# Supplementary material for: Hepatic MIR20B promotes nonalcoholic fatty liver disease by suppressing PPARA
Source: eLife. 2021 Dec 29;10:e70472. doi: 10.7554/eLife.70472 (PMC8758141; doi:10.7554/eLife.70472)
Supplement: Figure 1—figure supplement 3—source data 1. [file elife-70472-fig1-figsupp3-data1.xlsx]

## Sheet: Figure 1 Supplement 3A
Source Data - Figure 1 Supplement
qPCR
figure	Gene		mean	SEM	p value	n				Ppara	Srebf1	Tnf	Il6	Acta2	Col1a1	TBP
					(t-test)				NCD	19.0944	24.8961	26.2169	23.1688	24.9229	26.7334	26.3021
1 Supplement 3A	Ppara	NCD	1	0.150042		5				19.0422	26.3373	25.7031	23.7099	24.5749	26.1329	26.2721
		HFD	0.4801	0.0709866	0.00698467	5				18.9777	25.6234	24.9622	23.6908	25.6349	25.6852	26.3091
										19.8891	26.0933	25.9016	23.8668	26.5711	25.625	28.0337
figure	Gene		mean	SEM	p value	n				18.3441	25.57	25.497	24.0544	26.4099	25.6947	25.5154
					(t-test)				HFD	21.3992	24.345	25.186	23.253	24.2205	25.2455	26.8339
1 Supplement 3A	Srebf1	NCD	1	0.276179		5				20.0725	24.9806	24.3513	23.3463	23.4776	24.5922	26.6158
		HFD	1.76773	0.275627	0.0423288	5				19.6811	24.2943	23.8202	22.6088	23.7908	24.1617	26.0535
										19.549	24.7415	24.383	22.5814	22.9154	24.1822	25.9467
figure	Gene		mean	SEM	p value	n				19.7619	24.9699	25.2438	22.4542	25.1729	24.1958	26.6895
					(t-test)
1 Supplement 3A	Tnf	NCD	1	0.302631		5
		HFD	1.74743	0.214489	0.0393324	5
figure	Gene		mean	SEM	p value	n
					(t-test)
1 Supplement 3A	Il6	NCD	1	0.312468		5
		HFD	1.48395	0.201118	0.114517	5
figure	Gene		mean	SEM	p value	n
					(t-test)
1 Supplement 3A	Acta2	NCD	1	0.225122		5
		HFD	2.86567	0.508056	0.00498554	5
figure	Gene		mean	SEM	p value	n
					(t-test)
1 Supplement 3A	Col1a1	NCD	1	0.448655		5
		HFD	2.06884	0.236178	0.0340387	5

## Sheet: Figure 1 Supplement 3B
Source Data - Figure 1 Supplement
qPCR
figure	Gene		mean	SEM	p value	n				Ppara	Srebf1	Tnf	Il6	Acta2	Col1a1	TBP
					(t-test)				NCD	20.1626	25.6028	24.2135	23.8303	22.5554	22.1732	26.3021
1 Supplement 3B	Ppara	NCD	1	0.245058		5				18.2514	25.3835	23.2798	23.885	22.9854	22.6522	26.2721
		MCD	0.487579	0.04761	0.0371017	5				17.6879	25.0764	24.06	23.4584	22.8355	21.2823	26.3091
										19.2256	25.9827	25.1229	24.1019	22.5246	20.3835	28.0337
figure	Gene		mean	SEM	p value	n				17.8373	24.5229	24.5898	24.3737	22.1683	20.422	25.5154
					(t-test)				MCD	19.9554	22.3888	21.1684	19.2468	21.0258	18.3261	26.8339
1 Supplement 3B	Srebf1	NCD	1	0.189675		5				19.7331	22.0517	20.9427	19.2142	20.2338	17.8931	26.6158
		MCD	9.66371	1.27767	7.57762e-05	5				19.1822	22.1894	21.1081	18.8333	20.8527	17.5169	26.0535
										18.8875	21.4904	21.3854	19.1957	22.1887	15.832	25.9467
figure	Gene		mean	SEM	p value	n				19.1559	21.6185	22.2609	18.7814	21.3709	15.9995	26.6895
					(t-test)
1 Supplement 3B	Tnf	NCD	1	0.211649		5
		MCD	6.73611	1.22226	0.000850421	5
figure	Gene		mean	SEM	p value	n
					(t-test)
1 Supplement 3B	Il6	NCD	1	0.309677		5
		MCD	24.2077	3.10984	3.71649e-05	5
figure	Gene		mean	SEM	p value	n
					(t-test)
1 Supplement 3B	Acta2	NCD	1	0.384086		5
		MCD	2.55129	0.642499	0.0359804	5
figure	Gene		mean	SEM	p value	n
					(t-test)
1 Supplement 3B	Col1a1	NCD	1	0.598512		5
		MCD	13.1756	4.34544	0.0120414	5

## Sheet: Figure 1 Supplement 3C
Source Data - Figure 1 Supplement
qPCR
figure	Gene		mean	SEM	p value	n				Ppara	Srebf1	Tnf	Il6	Acta2	Col1a1	TBP
					(t-test)				Lean	20.0037	25.4355	24.6096	24.9659	25.8892	23.4834	20.1626
1 Supplement 3C	Ppara	Lean	1	0.134388		4				19.6894	25.3196	24.9265	25.1002	25.9233	23.1361	19.7514
		ob/ob	0.671853	0.00746663	0.0470911	3				19.7079	24.9562	24.1808	25.1396	25.5069	22.4937	19.6879
										19.4686	25.2249	24.5283	24.8251	24.8602	23.3946	20.2256
figure	Gene		mean	SEM	p value	n			ob/ob	20.1383	22.938	23.9573	24.1123	22.9992	22.6813	19.8373
					(t-test)					20.227	23.1041	24.4653	23.9027	22.9663	22.4494	19.9554
1 Supplement 3C	Srebf1	Lean	1	0.0799273		4				20.0603	23.033	24.5203	23.3742	23.6678	22.432	19.7331
		ob/ob	4.23574	0.17322	4.02794e-06	3
figure	Gene		mean	SEM	p value	n
					(t-test)
1 Supplement 3C	Tnf	Lean	1	0.118784		4
		ob/ob	1.08828	0.147716	0.328502	3
figure	Gene		mean	SEM	p value	n
					(t-test)
1 Supplement 3C	Il6	Lean	1	0.142639		4
		ob/ob	2.10665	0.264698	0.00529463	3
figure	Gene		mean	SEM	p value	n
					(t-test)
1 Supplement 3C	Acta2	Lean	1	0.262593		4
		ob/ob	4.42614	0.787289	0.00265826	3
figure	Gene		mean	SEM	p value	n
					(t-test)
1 Supplement 3C	Col1a1	Lean	1	0.134075		4
		ob/ob	1.39493	0.170839	0.0183119	3
