# Supplementary material for: Hepatic MIR20B promotes nonalcoholic fatty liver disease by suppressing PPARA
Source: eLife. 2021 Dec 29;10:e70472. doi: 10.7554/eLife.70472 (PMC8758141; doi:10.7554/eLife.70472)
Supplement: Figure 1—figure supplement 4—source data 1. [file elife-70472-fig1-figsupp4-data1.xlsx]

## Sheet: Figure 1 Supplement 4A
Source Data - Figure 1 Supplement
qPCR
figure	Gene	HepG2	mean	SEM	p value	n													miR-20a	miR-129	miR-219a	miR-4782	miR-6766	miR-106a	miR-106b	miR-17	miR-519d	U6
					(t-test)													NT	30.44	20.67	33.03	33.86	28.43	27.07	27.53	28.05	23.48	28.2755
1 Supplement 4A	miR-20a	NT	1	0.480421		3													31.08	20.56	31.58	33.99	28.22	25.51	27.62	28.7	24.05	27.2141
		OA	1.59719	0.0929424	0.144663	3													31.77	21.19	36.86	33.47	27.15	21.03	27.43	29.75	24.42	27.4595
																		OA	31.02	20.06	33.46	32.64	27.82	24.81	27.18	27.66	22.53	28.7156
figure	Gene	HepG2	mean	SEM	p value	n													31.05	20.16	35.89	33.89	27.2	22.87	27.27	28	23.47	28.5527
					(t-test)														30.97	20.46	36.9	33.86	27.46	22.71	27.5	27.9	24.09	28.3859
1 Supplement 4A	miR-129	NT	1	0.289247		3
		OA	2.63688	0.373643	0.0128599	3
figure	Gene	HepG2	mean	SEM	p value	n
					(t-test)
1 Supplement 4A	miR-219a	NT	1	0.487986		3
		OA	0.531176	0.379002	0.245123	3
figure	Gene	HepG2	mean	SEM	p value	n
					(t-test)
1 Supplement 4A	miR-4782	NT	1	0.223394		3
		OA	2.48681	0.929907	0.0975005	3
figure	Gene	HepG2	mean	SEM	p value	n
					(t-test)
1 Supplement 4A	miR-6766	NT	1	0.243852		3
		OA	2.39561	0.255936	0.00842392	3
figure	Gene	HepG2	mean	SEM	p value	n
					(t-test)
1 Supplement 4A	miR-106a	NT	1	0.909082		3
		OA	1.28024	0.395143	0.395709	3
figure	Gene	HepG2	mean	SEM	p value	n
					(t-test)
1 Supplement 4A	miR-106b	NT	1	0.238064		3
		OA	2.07992	0.264254	0.0192717	3
figure	Gene	HepG2	mean	SEM	p value	n
					(t-test)
1 Supplement 4A	miR-17	NT	1	0.519039		3
		OA	2.85783	0.374121	0.0219776	3
figure	Gene	HepG2	mean	SEM	p value	n
					(t-test)
1 Supplement 4A	miR-519d	NT	1	0.426833		3
		OA	2.8097	1.0598	0.094189	3

## Sheet: Figure 1 Supplement 4B
Source Data - Figure 1 Supplement
qPCR
figure	Gene	Huh7	mean	SEM	p value	n			figure	Gene	Huh7	mean	SEM	p value	n				miR-20b	miR-20a	miR-129	miR-219a	miR-4782	miR-6766	miR-106a	miR-106b	miR-17	miR-519d	U6
					(t-test)									(t-test)				NT	26.7305	29.17	33.54	24.83	34.18	27.68	27.57	32.47	27.2198	27.0744	24.7473
1 Supplement 4B	miR-20b	NT	1	0.111419		3			1 Supplement 4B	miR-6766	NT	1	0.17413		3				26.2117	29.02	33.69	25.32	33.98	28.3	28.58	36.18	27.5722	27.405	24.767
		OA	4.23858	0.53107	0.00197932	3					OA	2.04594	0.179858	0.00696997	3				26.2964	28.54	33.02	24.9	33.76	28.53	28.68	33.95	27.5987	27.861	24.8005
																		OA	24.8805	29.07	31.77	23.5	33.81	27.75	28.76	34.9	27.897	26.9896	25.6545
figure	Gene	Huh7	mean	SEM	p value	n			figure	Gene	Huh7	mean	SEM	p value	n				24.7572	29.31	31.74	23.53	33.56	27.44	28.68	35.25	27.5075	28.0723	24.9349
					(t-test)									(t-test)					24.3765	29.12	31.11	23.6	35.46	27.15	28.72	34.94	27.3918	27.9534	24.7451
1 Supplement 4B	miR-20a	NT	1	0.14849		3			1 Supplement 4B	miR-106a	NT	1	0.256207		3
		OA	1.09291	0.261723	0.386462	3					OA	0.906982	0.171329	0.388923	3
figure	Gene	Huh7	mean	SEM	p value	n			figure	Gene	Huh7	mean	SEM	p value	n
					(t-test)									(t-test)
1 Supplement 4B	miR-129	NT	1	0.157652		3			1 Supplement 4B	miR-106b	NT	1	0.56309		3
		OA	4.62805	0.621525	0.00240434	3					OA	0.478825	0.12104	0.208348	3
figure	Gene	Huh7	mean	SEM	p value	n			figure	Gene	Huh7	mean	SEM	p value	n
					(t-test)									(t-test)
1 Supplement 4B	miR-219a	NT	1	0.100572		3			1 Supplement 4B	miR-17	NT	1	0.0787302		3
		OA	3.63837	0.80387	0.0155889	3					OA	1.15432	0.102737	0.14953	3
figure	Gene	Huh7	mean	SEM	p value	n			figure	Gene	Huh7	mean	SEM	p value	n
					(t-test)									(t-test)
1 Supplement 4B	miR-4782	NT	1	0.0949967		3			1 Supplement 4B	miR-519d	NT	1	0.143368		3
		OA	1.29058	0.49944	0.299098	3					OA	1.28839	0.59497	0.331014	3

## Sheet: Figure 1 Supplement 4C
Source Data - Figure 1 Supplement
qPCR																	miR-20b	miR-20a	miR-129	miR-219a	miR-106a	miR-106b	miR-17	miR-519d	U6
figure	Gene		mean	SEM	p value	n			figure	Gene		mean	SEM	p value	n		22.5887	26.24	25.6	33.47	29.73	27.54	28.61	30.62	26.5671
					(t-test)									(t-test)			22.6536	26.21	25.31	34.18	32.02	28.77	28.9	30.27	26.0474
1 Supplement 4C	miR-20b	NCD	1	0.112669		5			1 Supplement 4C	miR-106b	NCD	1	0.309337		5		22.7523	26.51	24.22	33.95	29.59	29.02	28.5	30.37	26.4146
		HFD	1.68743	0.141333	0.00260618	5					HFD	1.03144	0.179236	0.466039	5		22.6619	25.02	24.31	34.9	28	28.75	28.97	30.58	25.6498
																	22.9023	26.08	25.58	35.25	31.11	28.97	29.43	30.48	26.7269
figure	Gene		mean	SEM	p value	n			figure	Gene		mean	SEM	p value	n		23.5085	26.29	25.04	33.94	33.67	29.44	29.95	30.8	28.0599
					(t-test)									(t-test)			22.4017	26.54	24.54	33.72	33.04	28.93	29.19	30.8	26.9895
1 Supplement 4C	miR-20a	NCD	1	0.115997		5			1 Supplement 4C	miR-17	NCD	1	0.160709		5		22.434	25.17	24.51	34.03	33.73	29.02	29.25	30.56	26.2846
		HFD	1.74468	0.280109	0.0197747	5					HFD	1.28476	0.173955	0.131792	5		22.5035	26.16	25.26	33.71	32.54	29.09	28.64	30.66	26.9214
																	22.1015	25.28	24.32	33.34	32.44	28.94	28.73	30.59	26.4015
figure	Gene		mean	SEM	p value	n			figure	Gene		mean	SEM	p value	n
					(t-test)									(t-test)
1 Supplement 4C	miR-129	NCD	1	0.199766		5			1 Supplement 4C	miR-519d	NCD	1	0.121341		5
		HFD	1.8841	0.348393	0.0294307	5					HFD	1.41053	0.313379	0.128311	5
figure	Gene		mean	SEM	p value	n
					(t-test)
1 Supplement 4C	miR-219a	NCD	1	0.271767		5
		HFD	2.22671	0.465108	0.0261487	5
figure	Gene		mean	SEM	p value	n
					(t-test)
1 Supplement 4C	miR-106a	NCD	1	0.321264		5
		HFD	0.159365	0.0277939	0.0156401	5
