# Supplementary material for: Hepatic MIR20B promotes nonalcoholic fatty liver disease by suppressing PPARA
Source: eLife. 2021 Dec 29;10:e70472. doi: 10.7554/eLife.70472 (PMC8758141; doi:10.7554/eLife.70472)
Supplement: Figure 1—source data 1. [file elife-70472-fig1-data1.xlsx]

## Sheet: Figure 1B
Source Data - Figure 1
					vs. Normal	vs. Steatosis									vs. Normal	vs. Steatosis
figure	Gene	Patients	mean	SEM	p value	p value	n			figure	Gene	Patients	mean	SEM	p value	p value	n			miR-20b	miR-20a	miR-129	miR-219a	miR-4782	miR-6766	miR-106a	miR-106b	miR-17	miR-519d	U6
					(t-test)	(t-test)									(t-test)	(t-test)			Normal	23.9617	25.9251	22.7135	28.8726	24.3223	28.5701	18.6166	26.4097	24.8498	25.5778	27.1491
1B	miR-20b	Normal	1	0.204937			11			1B	miR-6766	Normal	1	0.225451			11			25.1731	28.9179	22.9156	29.4534	24.2014	30.0068	18.3377	27.2016	25.0694	24.5301	26.4174
		Steatosis	3.27123	0.495666	0.000190342		4					Steatosis	0.148522	0.08482	0.0273817		4			24.0462	26.9183	23.8401	31.0296	24.3096	29.7846	19.9912	26.5373	22.9771	21.1653	27.4237
		NASH	8.31258	1.40519	2.28629e-06	0.0118736	6					NASH	0.812336	0.337436	0.324563	0.0799283	6			25.2861	28.9449	21.4243	29.7905	24.3821	28.2597	20.9364	25.7442	24.272	25.3037	27.6411
																				25.768	25.6788	23.8699	30.6376	23.4528	29.8716	21.6172	26.6735	20.311	24.8916	29.0044
					vs. Normal	vs. Steatosis									vs. Normal	vs. Steatosis				25.3451	28.2683	22.1287	31.4485	24.4127	30.048	21.178	27.0722	20.0187	24.7634	25.8077
figure	Gene	Patients	mean	SEM	p value	p value	n			figure	Gene	Patients	mean	SEM	p value	p value	n			24.4756	29.0126	23.5427	29.7634	24.022	29.7176	21.9216	26.3263	27.2524	22.7546	26.7857
					(t-test)	(t-test)									(t-test)	(t-test)				25.6859	27.8153	24.0757	31.5196	24.6353	29.9657	21.9422	26.5199	21.5211	25.1386	28.557
1B	miR-20a	Normal	1	0.395334			11			1B	miR-106a	Normal	1	0.270898			11			24.5421	28.6837	24.0665	31.7882	25.1834	29.7439	22.0568	27.2312	19.8496	21.7953	27.038
		Steatosis	1.75593	0.248148	0.155915		4					Steatosis	0.239431	0.14424	0.0719297		4			26.6595	28.6388	24.9757	31.9284	25.9547	30.6304	21.7013	24.8107	28.0757	25.3904	29.715
		NASH	4.18433	0.709196	0.000404758	0.0144217	6					NASH	0.722607	0.340993	0.277527	0.154551	6			26.5807	28.6086	26.1368	32.1365	25.2555	31.0636	21.7263	26.6917	25.1337	25.8615	31.0533
																			Steatosis	24.7845	27.202	23.0279	30.4589	26.0583	36.0619	24.8803	29.0424	23.2959	23.4202	28.4937
					vs. Normal	vs. Steatosis									vs. Normal	vs. Steatosis				24.6722	27.3301	23.1201	30.8895	27.86	34.3833	25.6298	25.785	27.7209	24.1785	29.4038
figure	Gene	Patients	mean	SEM	p value	p value	n			figure	Gene	Patients	mean	SEM	p value	p value	n			24.8373	27.9991	23.4809	31.2044	26.8104	32.4523	25.4484	27.6898	23.7011	23.4654	29.8047
					(t-test)	(t-test)									(t-test)	(t-test)				24.1636	26.7238	23.1529	31.1783	28.9321	34.5151	21.9924	25.5617	21.5057	21.7145	29.1471
1B	miR-129	Normal	1	0.228949			11			1B	miR-106b	Normal	1	0.438468			11		NASH	23.6942	27.0071	23.8509	30.5127	24.9684	33.628	21.3766	27.6615	26.163	23.6769	30.2002
		Steatosis	2.77208	0.308327	0.000847472		4					Steatosis	1.1491	0.404099	0.429094		4			23.0762	25.1344	22.0824	29.4331	24.7978	32.4285	21.8141	27.9638	23.9892	25.7099	29.0468
		NASH	3.86446	0.555047	2.79849e-05	0.0904786	6					NASH	0.684986	0.102222	0.313155	0.127982	6			21.9243	25.9175	23.1384	32.6355	22.4207	31.3363	23.2478	25.8249	25.2777	23.352	28.3034
																				25.2685	26.8369	22.6611	31.7195	24.9247	31.678	25.7136	27.3169	24.889	25.751	29.0954
					vs. Normal	vs. Steatosis									vs. Normal	vs. Steatosis				24.1825	26.8889	23.441	31.6882	24.7688	30.5268	22.9536	27.7396	24.5698	24.3088	30.2965
figure	Gene	Patients	mean	SEM	p value	p value	n			figure	Gene	Patients	mean	SEM	p value	p value	n			24.2682	26.9998	23.6095	30.6487	24.9347	31.4676	24.9004	28.6523	27.0219	23.5402	30.4111
					(t-test)	(t-test)									(t-test)	(t-test)
1B	miR-219a	Normal	1	0.211824			11			1B	miR-17	Normal	1	0.45961			11
		Steatosis	1.65542	0.164427	0.0582044		4					Steatosis	0.997181	0.497463	0.498736		4
		NASH	2.68703	0.766945	0.0085205	0.159212	6					NASH	0.301333	0.0897673	0.154292	0.0818583	6
					vs. Normal	vs. Steatosis									vs. Normal	vs. Steatosis
figure	Gene	Patients	mean	SEM	p value	p value	n			figure	Gene	Patients	mean	SEM	p value	p value	n
					(t-test)	(t-test)									(t-test)	(t-test)
1B	miR-4782	Normal	1	0.328642			11			1B	miR-519d	Normal	1	0.309638			11
		Steatosis	0.275456	0.0838172	0.118843		4					Steatosis	3.89828	1.38917	0.00731617		4
		NASH	2.35951	0.416795	0.0139595	0.00208759	6					NASH	2.58984	0.871512	0.0279676	0.224197	6

## Sheet: Figure 1C
Source Data - Figure 1
										miR-20b	U6
figure	Gene	HepG2	mean	SEM	p value	n			NT	25.9863	28.2755
					(t-test)					24.8485	27.2141
1C	miR-20b	NT	1	0.155996		3				24.4973	27.4595
		OA	9.62582	1.29482	0.00135464	3			OA	22.9341	28.7156
										22.3922	28.5527
										22.8896	28.3859

## Sheet: Figure 1D
Source Data - Figure 1
figure	Gene	Huh7	mean	SEM	p value	n			miR-20b	U6
					(t-test)			NT	26.7395	27.9238
1D	miR-20b	NT	1	0.268133		3			26.9482	28.6273
		OA	5.83816	1.2582	0.00988005	3			27.305	27.236
									27.2823	27.1922
									26.5512	27.3653
									26.1968	27.5538
								OA	24.4925	28.7645
									24.933	28.6667
									25.241	28.5094
									25.4467	28.596
									25.3472	28.4025
									25.289	28.3694

## Sheet: Figure 1E
Source Data - Figure 1
									miR-20b	U6
figure	Gene		mean	SEM	p value	n		NCD	22.5887	26.5671
					(t-test)				22.6536	26.0474
1E	miR-20b	NCD	1	0.112669		5			22.7523	26.4146
		HFD	2.24676	0.406384	0.00912305	5			22.6619	25.6498
									22.9023	26.7269
								HFD	22.5085	28.0599
									22.4017	26.9895
									21.634	26.2846
									22.5035	26.9214
									22.1015	26.4015

## Sheet: Figure 1F
Source Data - Figure 1
figure	Gene		mean	SEM	p value	n			miR-20b	U6
					(t-test)			NCD	18.9213	21.0958
1F	miR-20b	NCD	1	0.297003		5			18.5893	20.6604
		MCD	2.65915	0.735264	0.0348849	5			18.4637	20.4753
									19.1524	20.6246
									17.2674	19.6619
								MCD	18.076	21.2185
									17.7981	20.966
									17.4693	21.1915
									17.0753	20.9035
									17.3354	20.46

## Sheet: Figure 1G
Source Data - Figure 1
figure	Gene		mean	SEM	p value	n			miR-20b	universe
					(t-test)			Lean	29.5047	26.8422
1G	miR-20b	Lean	1	0.170903		4			30.1345	26.4569
		ob/ob	1.77316	0.360477	0.0432423	3			28.9697	26.1335
									28.7748	25.2333
								ob/ob	28.8283	26.4096
									29.4033	26.5998
									28.6851	26.8698
