# Supplementary material for: Hepatic MIR20B promotes nonalcoholic fatty liver disease by suppressing PPARA
Source: eLife. 2021 Dec 29;10:e70472. doi: 10.7554/eLife.70472 (PMC8758141; doi:10.7554/eLife.70472)
Supplement: Figure 2—figure supplement 2—source data 1. [file elife-70472-fig2-figsupp2-data1.xlsx]

## Sheet: Figure 2 Supplement 2
Source Data - Figure 2 Supplement
qPCR
figure	Gene	HepG2	mean	SEM	p value	n				PPARA	NAGK	USP46	ZNFX1	ITGB8	EPHA5	BMPR2	TBP
					(t-test)				miR-NC	27.8383	25.7932	25.5925	26.1882	30.4438	29.2872	25.4492	26.3284
Supplement 2	PPARA	miR-NC	1	0.0565689		3				27.0367	25.3428	25.105	25.9187	29.7585	28.3793	24.6226	25.5175
		miR-20b	0.386183	0.0121618	0.000223472	3				27.1818	25.462	24.9429	25.6912	29.8697	28.4432	24.7857	25.4148
									miR-20b	28.643	25.3521	24.7833	26.0759	29.7736	28.3777	24.9222	25.6344
figure	Gene	HepG2	mean	SEM	p value	n				28.4679	25.2178	24.9106	26.098	30.3647	28.6599	24.994	25.4512
					(t-test)					28.6103	25.4079	24.6532	26.5127	30.4719	28.8328	25.1922	25.7318
Supplement 2	NAGK	miR-NC	1	0.119693		3
		miR-20b	1.02757	0.018593	0.41556	3
figure	Gene	HepG2	mean	SEM	p value	n
					(t-test)
Supplement 2	USP46	miR-NC	1	0.0707628		3
		miR-20b	1.2252	0.129968	0.101358	3
figure	Gene	HepG2	mean	SEM	p value	n
					(t-test)
Supplement 2	ZNFX1	miR-NC	1	0.117061		3
		miR-20b	0.676831	0.0467769	0.0390667	3
figure	Gene	HepG2	mean	SEM	p value	n
					(t-test)
Supplement 2	ITGB8	miR-NC	1	0.0675453		3
		miR-20b	0.815429	0.139357	0.149602	3
figure	Gene	HepG2	mean	SEM	p value	n
					(t-test)
Supplement 2	EPHA5	miR-NC	1	0.0336116		3
		miR-20b	0.867047	0.0264009	0.0375702	3
figure	Gene	HepG2	mean	SEM	p value	n
					(t-test)
Supplement 2	BMPR2	miR-NC	1	0.00444905		3
		miR-20b	0.804734	0.0424937	0.0190496	3
