# Supplementary material for: Hepatic MIR20B promotes nonalcoholic fatty liver disease by suppressing PPARA
Source: eLife. 2021 Dec 29;10:e70472. doi: 10.7554/eLife.70472 (PMC8758141; doi:10.7554/eLife.70472)
Supplement: Figure 2—figure supplement 3—source data 1. [file elife-70472-fig2-figsupp3-data1.xlsx]

## Sheet: Figure 2 Supplement 3A
Source Data - Figure 2 Supplement
qPCR					vs. Normal	vs. Steatosis					PPARA	RORA	RORC	THRB	TBP
figure	Gene	Patients	mean	SEM	p value	p value	n			Normal	27.2899	25.09	26.12	27.64	28.6359
					(t-test)	(t-test)					26.8898	24.94	25.35	28	28.3843
2 Supplement 3A	PPARA	Normal	1	0.168582			11				25.8097	23.32	26.9	28.98	26.9026
		Steatosis	0.459884	0.0913113	0.0497487		4				26.577	24	26.49	26.98	27.2531
		NASH	0.108722	0.0452824	0.00118429	0.00368826	6				28.086	23.7	29.1	29.92	27.5575
											26.6445	24.05	27.06	27.55	28.152
					vs. Normal	vs. Steatosis					27.7634	23.96	27.17	29.81	25.6161
figure	Gene	Patients	mean	SEM	p value	p value	n				27.3754	23.15	28.52	30.04	27.6758
					(t-test)	(t-test)					27.9612	23.12	26.09	31.82	29.2712
2 Supplement 3A	RORA	Normal	1	0.32748			11				29.6068	23.86	31.17	33.6	30.3001
		Steatosis	0.706619	0.0953652	0.311906		4				29.0173	23.95	27.48	29.21	27.0256
		NASH	0.440826	0.113156	0.129711	0.0725705	6			Steatosis	26.6729	22.61	26.29	29.32	26.2618
											26.4932	23.11	26.21	28.14	26.8239
					vs. Normal	vs. Steatosis					27.8115	22.69	25.94	27.51	27.027
figure	Gene	Patients	mean	SEM	p value	p value	n				29.0983	23.55	25.24	30.18	28.0755
					(t-test)	(t-test)				NASH	28.5128	19.46	22.84	24.68	23.2596
2 Supplement 3A	RORC	Normal	1	0.344493			11				26.9553	19.81	21.75	24.16	22.7157
		Steatosis	1.06743	0.459831	0.461019		4				24.7036	19	23.23	24.15	21.174
		NASH	0.443144	0.0973905	0.141202	0.0896952	6				25.2472	20.16	22.08	23.8	22.3745
											26.9828	21.56	25.14	28.46	26.0309
					vs. Normal	vs. Steatosis					26.9739	21.55	25.58	27.77	25.1053
figure	Gene	Patients	mean	SEM	p value	p value	n
					(t-test)	(t-test)
2 Supplement 3A	THRB	Normal	1	0.310573			11
		Steatosis	0.561455	0.177195	0.2246		4
		NASH	0.403387	0.0741436	0.101887	0.20519	6
