# Supplementary material for: Hepatic MIR20B promotes nonalcoholic fatty liver disease by suppressing PPARA
Source: eLife. 2021 Dec 29;10:e70472. doi: 10.7554/eLife.70472 (PMC8758141; doi:10.7554/eLife.70472)
Supplement: Figure 2—figure supplement 4—source data 1. [file elife-70472-fig2-figsupp4-data1.xlsx]

## Sheet: Figure 2 Supplement 4A
Source Data - Figure 2 Supplement
qPCR					vs. Normal	vs. Steatosis
figure	Gene	HepG2	mean	SEM	p value	p value	n				PPARA	TBP
					(t-test)	(t-test)				NT	24.5837	27.9403
2 Supplement 4A	PPARA	NT	1	0.0829023			3				24.2778	27.286
		OA	0.558611	0.0617085	0.00647037		3				24.5234	27.536
										OA	25.55	27.4862
											24.4373	26.8641
											25.0181	27.483

## Sheet: Figure 2 Supplement 4B
Source Data - Figure 2 Supplement
qPCR					vs. Normal	vs. Steatosis
figure	Gene	Huh7	mean	SEM	p value	p value	n				PPARA	TBP
					(t-test)	(t-test)				NT	26.809	28.8257
2 Supplement 4B	PPARA	NT	1	0.146513			3				26.0702	28.275
		OA	0.602007	0.0706867	0.0353528		3				26.1063	27.5567
										OA	26.083	26.9273
											26.5008	27.9444
											27.1412	28.3685

## Sheet: Figure 2 Supplement 4C
Source Data - Figure 2 Supplement
qPCR					vs. Normal	vs. Steatosis				Ppara	TBP
figure	Gene		mean	SEM	p value	p value	n		NCD	19.0944	26.3021
					(t-test)	(t-test)				19.0422	26.2721
2 Supplement 4C	Ppara	NCD	1	0.0215752			5			18.9777	26.3091
		HFD	0.503532	0.066028	0.000344947		5			19.8891	28.0337
										18.3441	25.5154
									HFD	21.3992	26.8339
										20.0725	26.6158
										19.6811	26.0535
										19.549	25.9467
										19.7619	26.6895
