# Supplementary material for: Hepatic MIR20B promotes nonalcoholic fatty liver disease by suppressing PPARA
Source: eLife. 2021 Dec 29;10:e70472. doi: 10.7554/eLife.70472 (PMC8758141; doi:10.7554/eLife.70472)
Supplement: Figure 2—figure supplement 5—source data 1. [file elife-70472-fig2-figsupp5-data1.xlsx]

## Sheet: Figure 2 Supplement 5B
Source Data - Figure 2 Supplement
		miR-NC			miR-NC OA			miR-20b			miR-20b OA
	Vector	1.16557	0.847537	0.986898	5.59848	5.96979	5.68977	1.16849	1.67558	2.08078	9.20498	9.59805	10.0882
	PPARA – 3’UTR WT	0.823173	0.896589	0.855658	2.30482	2.90937	3.2066	1.09475	1.02361	0.868002	4.75517	5.61732	6.45804
	PPARA – 3’UTR Mut	0.680888	1.00704	0.703627	2.41559	2.73395	2.74759	0.817975	0.799134	0.715972	3.13936	2.84959	2.32236

## Sheet: Figure 2 Supplement 5CD
Source Data - Figure 2 Supplement
qPCR					vs. miR-NC	vs. miR-NC + WT	vs. miR-NC + Mut
figure	Gene	HepG2	mean	SEM	p value	p value	p value	n					PPARA	CPT1A	ACOX1	CD36	FABP1	TBP
					(t-test)	(t-test)	(t-test)					miR-NC	21.5993	22.3549	20.808	19.749	19.8231	23.8548
2 Supplement 5	PPARA	miR-NC	1	0.0461788				3					21.577	22.3562	20.902	19.8249	19.817	23.9956
		miR-NC + OA	0.583247	0.0262561	0.000712922			3					21.4226	22.5059	20.8194	19.8534	19.9746	23.9059
		miR-20b	0.621349	0.0316663	0.0012471			3				miR-NC + OA	21.9193	22.5404	20.8001	20.172	19.7578	23.566
		miR-20b + OA	0.32516	0.106904	0.00220419			3					22.1032	22.5635	21.4351	19.7967	20.8363	23.8017
		miR-NC + WT	3.17024	0.205075				3					22.2577	22.5126	21.449	19.8909	20.8358	23.7369
		miR-NC + WT + OA	2.04991	0.173396		0.00700607		3				miR-20b	21.8699	23.1872	21.2126	20.0914	20.1058	23.5316
		miR-20b + WT	2.28135	0.129462		0.0107406		3					21.9508	23.1961	21.1715	20.0853	20.1664	23.547
		miR-20b + WT + OA	1.53554	0.155573		0.00157498		3					22.4168	23.1527	21.3215	20.3166	20.7553	24.2551
		miR-NC + Mut	3.3823	0.428083				3				miR-20b + OA	23.1152	24.1402	21.7181	21.3237	20.7512	24.6111
		miR-NC + Mut + OA	2.9146	0.147049			0.179923	3					23.5207	23.8669	21.9862	20.9878	20.9008	23.7954
		miR-20b + Mut	3.05252	0.55975			0.332078	3					23.4569	23.9788	21.1924	21.29	20.9629	23.5668
		miR-20b + Mut + OA	2.41729	0.200877			0.0554246	3				miR-NC + WT	19.5865	21.3848	19.7407	18.836	19.2297	23.4593
													19.9386	21.4707	19.8387	19.0299	19.4637	24.01
					vs. miR-NC	vs. miR-NC + OA	vs. anti-miR-20b + OA						19.3729	21.2352	19.5645	18.7024	19.1531	23.5709
figure	Gene	HepG2	mean	SEM	p value	p value	p value	n				miR-NC + WT + OA	20.4426	21.8868	20.1899	19.2628	19.5876	23.8161
					(t-test)	(t-test)	(t-test)						19.9798	22.4602	20.3638	18.8293	19.3987	23.6194
2 Supplement 5	CPT1A	miR-NC	1	0.0484151				3					20.2995	21.3595	20.1217	19.1346	19.4739	23.5297
		miR-NC + OA	0.784307	0.0364234	0.011792			3				miR-20b + WT	19.773	21.6449	20.422	19.0598	18.8393	23.4602
		miR-20b	0.546697	0.10191	0.00794712			3					19.9704	21.612	20.4913	19.1652	19.2029	23.5952
		miR-20b + OA	0.359938	0.0654548	0.000707284			3					19.8631	21.4123	19.8621	18.781	19.1661	23.2731
		miR-NC + WT	1.75622	0.16162				3				miR-20b + WT + OA	20.6621	22.4244	20.8224	20.4768	21.0201	23.8076
		miR-NC + WT + OA	1.22835	0.234496		0.0687158		3					21.0414	22.3889	21.3782	20.3205	20.2673	23.7224
		miR-20b + WT	1.29388	0.0454749		0.025588		3					20.7908	22.8523	21.401	20.3028	20.1643	23.9391
		miR-20b + WT + OA	0.845044	0.0520713		0.00291111		3				miR-NC + Mut	20.2816	21.9907	20.2308	19.089	19.5124	24.2184
		miR-NC + Mut	1.54561	0.208669				3					20.0072	22.0735	20.3003	19.4095	19.4623	24.4794
		miR-NC + Mut + OA	1.08764	0.0962607			0.0585308	3					19.997	22.2493	20.975	19.1333	19.6094	23.9639
		miR-20b + Mut	1.49252	0.148677			0.422987	3				miR-NC + Mut + OA	20.0698	22.2833	20.4878	19.3293	19.4183	24.1358
		miR-20b + Mut + OA	1.17451	0.17068			0.120339	3					19.8992	22.3114	20.3137	19.4169	19.5353	23.7236
													19.8712	22.1523	20.1841	18.9138	19.5012	23.7667
					vs. miR-NC	vs. miR-NC + OA	vs. anti-miR-20b + OA					miR-20b + Mut	19.8537	22.0653	19.9338	19.2455	18.9503	24.0064
figure	Gene	HepG2	mean	SEM	p value	p value	p value	n					19.8015	21.7616	20.1151	19.0681	19.2281	24.1179
					(t-test)	(t-test)	(t-test)						20.2493	21.6631	20.2771	18.8836	19.027	23.6077
2 Supplement 5	ACOX1	miR-NC	1	0.0100436				3				miR-20b + Mut + OA	20.1259	22.0971	20.1609	19.1497	19.4483	23.5865
		miR-NC + OA	0.665835	0.0710387	0.00480312			3					20.1891	22.2612	20.355	18.9366	18.8781	23.8165
		miR-20b	0.704447	0.101065	0.0218381			3					19.9567	21.7105	20.2915	18.9945	19.1035	23.8261
		miR-20b + OA	0.637195	0.134796	0.0274976			3
		miR-NC + WT	1.86807	0.167211				3
		miR-NC + WT + OA	1.28532	0.0966736		0.0196365		3
		miR-20b + WT	1.08514	0.0891736		0.00723819		3
		miR-20b + WT + OA	0.743398	0.101008		0.00225743		3
		miR-NC + Mut	1.65714	0.366027				3
		miR-NC + Mut + OA	1.38944	0.0671892			0.255854	3
		miR-20b + Mut	1.69662	0.253228			0.466796	3
		miR-20b + Mut + OA	1.31839	0.0294721			0.20424	3
					vs. miR-NC	vs. miR-NC + OA	vs. anti-miR-20b + OA
figure	Gene	HepG2	mean	SEM	p value	p value	p value	n
					(t-test)	(t-test)	(t-test)
2 Supplement 5	CD36	miR-NC	1	0.0237467				3
		miR-NC + OA	0.790174	0.0950403	0.0494377			3
		miR-20b	0.717937	0.0848985	0.0164575			3
		miR-20b + OA	0.417016	0.0823828	0.00122181			3
		miR-NC + WT	1.64837	0.117566				3
		miR-NC + WT + OA	1.39297	0.112016		0.0954331		3
		miR-20b + WT	1.2577	0.0236755		0.0155758		3
		miR-20b + WT + OA	0.63808	0.0417446		0.00063196		3
		miR-NC + Mut	1.87273	0.115127				3
		miR-NC + Mut + OA	1.47956	0.167638			0.0626681	3
		miR-20b + Mut	1.67233	0.123107			0.150107	3
		miR-20b + Mut + OA	1.5356	0.141869			0.0693788	3
					vs. miR-NC	vs. miR-NC + OA	vs. anti-miR-20b + OA
figure	Gene	HepG2	mean	SEM	p value	p value	p value	n
					(t-test)	(t-test)	(t-test)
2 Supplement 5	FABP1	miR-NC	1	0.0501361				3
		miR-NC + OA	0.589058	0.128214	0.0202684			3
		miR-20b	0.653124	0.0157983	0.00136623			3
		miR-20b + OA	0.563846	0.157879	0.0290015			3
		miR-NC + WT	1.27714	0.0804648				3
		miR-NC + WT + OA	1.08646	0.0415606		0.0515082		3
		miR-20b + WT	1.26378	0.128422		0.467001		3
		miR-20b + WT + OA	0.634732	0.118914		0.00551948		3
		miR-NC + Mut	1.58767	0.207838				3
		miR-NC + Mut + OA	1.28265	0.153415			0.151553	3
		miR-20b + Mut	1.74664	0.164022			0.290293	3
		miR-20b + Mut + OA	1.50188	0.231914			0.398293	3
