# Supplementary material for: Hepatic MIR20B promotes nonalcoholic fatty liver disease by suppressing PPARA
Source: eLife. 2021 Dec 29;10:e70472. doi: 10.7554/eLife.70472 (PMC8758141; doi:10.7554/eLife.70472)
Supplement: Figure 2—source data 1. [file elife-70472-fig2-data1.xlsx]

## Sheet: Figure 2B
Source Data - Figure 2
					vs. miR-NC	vs. miR-NC + OA
figure		HepG2	Average	SEM	p value	p value	n
					(t-test)	(t-test)				miR-NC	miR-NC + OA	miR-20b	miR-20b + OA
2C	Triglyceride	miR-NC	45.5031	3.24386			3			51.3178	108.99	73.9238	127.68
		miR-NC + OA	104.658	2.41961	0.0219029		3			40.1038	100.624	63.9558	134.622
		miR-20b	64.1931	5.55076	6.37074e-05		3			45.0878	104.362	54.6998	117.178
		miR-20b + OA	126.493	5.07048	8.82601e-05	0.00887227	3

## Sheet: Figure 2I
		HepG2					Huh7					Primary Hepatocytes
		miR-NC	miR-20b				miR-NC	miR-20b				miR-NC	miR-20b
		4.1233	2.02532				1.936	1.11017				1.64902	0.785433
		2.73336	1.43771				2.87407	1.1708				2.03264	1.10848
		3.19926	1.50965				3.53857	2.07547				1.96552	1.13038
	Average	3.35197	1.65756			Average	2.78288	1.45215			Average	1.88239	1.0081
	SEM	0.408441	0.185047			SEM	0.464863	0.312154			SEM	0.118284	0.111512
	T.TEST		0.00972829			T.TEST		0.0381376			T.TEST		0.00288771

## Sheet: Figure 2H
Source Data - Figure 2
qPCR								qPCR								qPCR
figure	Gene	HepG2	mean	SEM	p value	n		figure	Gene	Huh7	mean	SEM	p value	n		figure	Gene	Primary Hepatocytes	mean	SEM	p value	n
					(t-test)								(t-test)								(t-test)
2H	PPARA	miR-NC	1	0.166067		3		2H	PPARA	miR-NC	1	0.323399		3		2H	Ppara	miR-NC	1	0.116393		3
		miR-20b	0.217465	0.0978887	0.00767811	3				miR-20b	0.208187	0.0561915	0.0366874	3				miR-20b	0.51427	0.134881	0.0263188	3
figure	Gene	HepG2	mean	SEM	p value	n		figure	Gene	Huh7	mean	SEM	p value	n		figure	Gene	Primary Hepatocytes	mean	SEM	p value	n
					(t-test)								(t-test)								(t-test)
2H	RORA	miR-NC	1	0.132102		3		2H	RORA	miR-NC	1	0.162663		3		2H	Rora	miR-NC	1	0.0954455		3
		miR-20b	0.535505	0.267645	0.0973167	3				miR-20b	0.645718	0.0877221	0.0638547	3				miR-20b	0.584183	0.111864	0.0237267	3
figure	Gene	HepG2	mean	SEM	p value	n		figure	Gene	Huh7	mean	SEM	p value	n		figure	Gene	Primary Hepatocytes	mean	SEM	p value	n
					(t-test)								(t-test)								(t-test)
2H	RORC	miR-NC	1	0.195146		3		2H	RORC	miR-NC	1	0.209029		3		2H	Rorc	miR-NC	1	0.0672985		3
		miR-20b	0.495089	0.0996693	0.0412778	3				miR-20b	0.476127	0.0765651	0.0391156	3				miR-20b	0.603461	0.100559	0.0152913	3
figure	Gene	HepG2	mean	SEM	p value	n		figure	Gene	Huh7	mean	SEM	p value	n		figure	Gene	Primary Hepatocytes	mean	SEM	p value	n
					(t-test)								(t-test)								(t-test)
2H	THRB	miR-NC	1	0.198255		3		2H	THRB	miR-NC	1	0.244287		3		2H	Thrb	miR-NC	1	0.026792		3
		miR-20b	0.414243	0.174009	0.0452781	3				miR-20b	0.438487	0.01844	0.0418338	3				miR-20b	0.631929	0.159192	0.0423909	3
figure	Gene	HepG2	mean	SEM	p value	n		figure	Gene	Huh7	mean	SEM	p value	n		figure	Gene	Primary Hepatocytes	mean	SEM	p value	n
					(t-test)								(t-test)								(t-test)
2H	NRBP1	miR-NC	1	0.24051		3		2H	NRBP1	miR-NC	1	0.200761		3		2H	Nrbp1	miR-NC	1	0.229771		3
		miR-20b	0.391912	0.115664	0.0424618	3				miR-20b	0.552148	0.0155563	0.0450997	3				miR-20b	0.836669	0.218967	0.316982	3
	PPARA	RORA	RORC	THRB	NRBP1	TBP			PPARA	RORA	RORC	THRB	NRBP1	TBP			Ppara	Rora	Rorc	Thrb	Nrbp1	Tbp
miR-NC	25.9691	28.6868	22.2647	25.2056	17.9431	19.9953		miR-NC	22.9092	28.5428	25.7415	24.4337	22.7569	19.8768		miR-NC	25.2827	24.3043	25.3043	28.5862	25.718	25.2417
	26.0217	29.0506	23.2185	25.7771	18.2319	20.906			21.6362	28.3052	25.6205	24.3804	22.2892	20.4794			24.8908	24.2981	25.1058	28.4673	26.4244	25.1045
	26.6592	29.4121	22.8887	25.6459	18.1023	21.386			22.4122	28.8596	25.4551	23.9967	22.7968	20.6999			24.6819	24.7601	24.9706	28.4578	26.6896	25.2177
miR-20b	28.4525	29.934	24.3121	26.8936	19.709	21.7653		miR-20b	23.6489	28.629	25.729	24.7643	22.8204	19.8467		miR-20b	25.7923	25.5533	25.7816	29.3045	26.9479	25.1596
	27.9228	29.4656	23.2224	26.7756	18.4817	19.6434			23.396	28.3042	26.096	24.8054	22.8806	19.7901			26.2425	24.8766	25.7811	29.2478	26.2432	24.6023
	28.6169	30.4942	22.9658	26.4081	19.3042	19.9338			24.6167	28.6964	26.173	24.6136	22.5825	19.4854			25.691	25.0621	25.8121	28.9106	26.1711	25.5

## Sheet: Figure 2C
Source Data - Figure 2
					vs. miR-NC	vs. miR-NC + OA
figure		HepG2	Average	SEM	p value	p value	n
					(t-test)	(t-test)
2C	Cholesterol	miR-NC	53.6667	5.5054			3
		miR-NC + OA	123.753	8.11192	0.0498921		3			miR-NC	miR-NC + OA	miR-20b	miR-20b + OA
		miR-20b	75.7533	8.76551	0.00101277		3			63.58	126.04	59.84	143.56
		miR-20b + OA	144.113	4.69048	0.000117606	0.0477549	3			44.56	108.7	90.08	136.28
										52.86	136.52	77.34	152.5

## Sheet: Figure 2L
Source Data - Figure 2
Target assay					vs. miR-NC	vs. miR-20b (30pmol/ml)
figure		HepG2	Average	SEM	p value	p value	n		WT
					(t-test)	(t-test)			miR-NC	0.970835	0.985814	0.949972	1.03161	1.04393	1.01784
2L	WT	miR-NC	1	0.0150576			3		miR-20b (30pmol/ml)	0.612924	0.59168	0.633247	0.640489	0.684859	0.713231
		miR-20b (30pmol/ml)	0.646072	0.0185002	1.94084e-08		3		miR-20b (50pmol/ml)	0.51723	0.485326	0.487875	0.538838	0.530478	0.596725
		miR-20b (50pmol/ml)	0.526079	0.0167049	6.43445e-10	0.000354316	3
									Mut
2L	Mut	miR-NC	1	0.0328618			3		miR-NC	0.939784	0.944918	1.09186	1.11255	0.973599	0.937285
		miR-20b (30pmol/ml)	0.945329	0.0108815	0.0726689		3		miR-20b (30pmol/ml)	0.979625	0.901117	0.939403	0.950782	0.938223	0.962822
		miR-20b (50pmol/ml)	0.958032	0.0130627	0.131369	0.236078	3		miR-20b (50pmol/ml)	0.910169	0.963389	0.956405	0.983399	0.935972	0.998856

## Sheet: Figure 2M
Source Data - Figure 2
Target assay					vs. miR-NC	vs. miR-20b (30pmol/ml)
figure		Huh7	Average	SEM	p value	p value	n		WT
					(t-test)	(t-test)			miR-NC	0.920147	1.00373	0.940232	0.93925	1.08781	1.10883
2M	WT	miR-NC	1	0.0174151			3		miR-20b (30pmol/ml)	0.727283	0.766312	0.666635	0.670762	0.66326	0.671015
		miR-20b (30pmol/ml)	0.694211	0.0174151	5.04058e-06		3		miR-20b (50pmol/ml)	0.590783	0.599624	0.561749	0.569511	0.607447	0.604339
		miR-20b (50pmol/ml)	0.588909	0.00777603	1.42504e-07	0.000127059	3
									Mut
2M	Mut	miR-NC	1	0.059462			3		miR-NC	1.12244	0.967208	1.13695	1.10933	0.869952	0.794123
		miR-20b (30pmol/ml)	1.01554	0.0587874	0.428122		3		miR-20b (30pmol/ml)	0.957614	0.985349	1.20843	1.16958	0.936086	0.8362
		miR-20b (50pmol/ml)	0.954643	0.0442607	0.277133	0.213599	3		miR-20b (50pmol/ml)	1.08273	1.00904	0.79678	0.851253	1.01263	0.97542
