# Supplementary material for: Hepatic MIR20B promotes nonalcoholic fatty liver disease by suppressing PPARA
Source: eLife. 2021 Dec 29;10:e70472. doi: 10.7554/eLife.70472 (PMC8758141; doi:10.7554/eLife.70472)
Supplement: Figure 3—source data 1. [file elife-70472-fig3-data1.xlsx]

## Sheet: Figure 3A
		miR-NC	miR-20b	miR-20b + PPARA
		4.31548	2.47018	4.24209
		4.92799	1.79904	4.59426
		5.88652	2.94844	5.23842
	Average	5.04333	2.40588	4.69159
	SEM	0.457175	0.333357	0.291701
	T.TEST		0.00478976	0.275977
			vs miR-20b	0.00334892

## Sheet: Figure 3B
Source Data - Figure 3
					vs. miR-NC	vs. miR-20b
figure	Luciferase		mean	SEM	p value	p value	n
					(t-test)	(t-test)
3B		miR-NC	1	0.0358894			3
		miR-20b	0.742252	0.0142755	2.77328e-05		3
		miR-20b + PPARα	1.24189	0.0363675	0.000399531	8.01034e-08	3
			miR-NC	miR-20b	miR-20b + PPARα
			1.10469	0.785874	1.33596
			1.11306	0.763224	1.37313
			0.915775	0.718786	1.16727
			0.943213	0.740338	1.18953
			0.933037	0.757632	1.20797
			0.990222	0.687661	1.1775

## Sheet: Figure 3C
Source Data - Figure 3
qPCR					vs. miR-NC	vs. miR-20b
figure	Gene		mean	SEM	p value	p value	n				PPARA	CPT1A	ACOX1	SREBF1	FASN	CD36	FABP1	TBP
					(t-test)	(t-test)				miR-NC	20.7706	22.7621	24.6533	23.8386	24.5319	29.5788	23.9348	26.6145
3C	PPARA	miR-NC	1	0.175702			3				20.3803	21.742	24.5823	24.5888	24.276	29.5605	24.2351	25.351
		miR-20b	0.441657	0.0357714	0.0178683		3				20.295	21.7293	24.2024	24.7542	23.5961	29.2872	24.148	25.6561
		miR-20b + PPARα	1.1497	0.135559	0.268466	0.00361497	3			miR-20b	20.7691	22.0627	24.605	24.828	24.1229	29.5462	24.9889	25.1674
											20.3417	22.4967	24.0079	23.8508	22.7231	29.8096	25.8985	24.679
					vs. miR-NC	vs. miR-20b					19.5274	21.9544	23.4653	23.0776	22.9717	29.8157	25.6275	23.5334
figure	Gene		mean	SEM	p value	p value	n			miR-20b + PPARα	20.1486	21.9608	23.8325	25.2112	24.9925	29.1	23.6554	26.0907
					(t-test)	(t-test)					20.4454	21.3232	24.4335	26.139	25.0364	29.4957	23.3643	25.8765
3C	CPT1A	miR-NC	1	0.0646639			3				19.7164	21.4797	23.4465	25.4051	23.5807	29.6095	23.702	25.199
		miR-20b	0.385352	0.119993	0.00537298		3
		miR-20b + PPARα	1.29395	0.214169	0.129577	0.0104074	3
					vs. miR-NC	vs. miR-20b
figure	Gene		mean	SEM	p value	p value	n
					(t-test)	(t-test)
3C	ACOX1	miR-NC	1	0.227597			3
		miR-20b	0.493896	0.0595481	0.0489209		3
		miR-20b + PPARα	1.30413	0.219373	0.195236	0.0117461	3
					vs. miR-NC	vs. miR-20b
figure	Gene		mean	SEM	p value	p value	n
					(t-test)	(t-test)
3C	SREBF1	miR-NC	1	0.0394996			3
		miR-20b	0.825178	0.087219	0.117888		3
		miR-20b + PPARα	0.662097	0.18514	0.128285	0.235078	3
					vs. miR-NC	vs. miR-20b
figure	Gene		mean	SEM	p value	p value	n
					(t-test)	(t-test)
3C	FASN	miR-NC	1	0.199456			3
		miR-20b	0.705673	0.206493	0.181609		3
		miR-20b + PPARα	0.665992	0.108956	0.107802	0.436647	3
					vs. miR-NC	vs. miR-20b
figure	Gene		mean	SEM	p value	p value	n
					(t-test)	(t-test)
3C	CD36	miR-NC	1	0.247193			3
		miR-20b	0.340293	0.116244	0.0365756		3
		miR-20b + PPARα	0.96082	0.25474	0.458713	0.0455034	3
					vs. miR-NC	vs. miR-20b
figure	Gene		mean	SEM	p value	p value	n
					(t-test)	(t-test)
3C	FABP1	miR-NC	1	0.110295			3
		miR-20b	0.238818	0.108754	0.0108438		3
		miR-20b + PPARα	1.85373	0.36532	0.0874083	0.00664887	3

## Sheet: Figure 3D
		miR-NC	miR-NC + siPPARA	anti-miR-20b	anti-miR-20b + siPPARA
		3.53234	1.32231	4.66981	1.15572
		4.33898	1.67266	4.29412	1.49573
		3.45269	2.17899	4.54006	1.67919
	Average	3.77467	1.72465	4.50133	1.44355
	SEM	0.283092	0.248663	0.110169	0.153349
	T.TEST		0.00277031	0.0374978	0.000965508
				vs anti-miR-20b	4.25334e-05
				vs siPPARA	0.195214

## Sheet: Figure 3E
Source Data - Figure 3
					vs. miR-NC	vs. miR-NC + siPPARA	vs. anti-miR-20b					miR-NC	miR-NC + siPPARA	anti-miR-20b	anti-miR-20b + siPPARA
figure	Luciferase		mean	SEM	p value	p value	p value	n				0.931787	0.755581	1.2064	0.824667
					(t-test)	(t-test)	(t-test)					0.789921	0.967859	1.11684	0.748183
3E		miR-NC	1	0.0502483				3				1.02236	0.990594	1.16705	0.903932
		miR-NC + siPPARA	0.870303	0.0380874	0.0333619			3				1.04163	0.793413	1.19559	0.920431
		anti-miR-20b	1.19628	0.0208286	0.00238982			3				1.13686	0.849594	1.26616	0.824649
		anti-miR-20b + siPPARA	0.853105	0.0268636	0.0137532	0.359907	7.2825e-07	3				1.07744	0.864778	1.22568	0.896765

## Sheet: Figure 3F
Source Data - Figure 3
qPCR					vs. miR-NC	vs. miR-NC + siPPARA	vs. anti-miR-20b
figure	Gene		mean	SEM	p value	p value	p value	n			PPARA	CPT1A	ACOX1	SREBF1	FASN	CD36	FABP1	TBP
					(t-test)	(t-test)	(t-test)			miR-NC	22.3076	28.5841	21.7318	22.5033	18.942	22.0818	14.1109	26.5177
3F	PPARA	miR-NC	1	0.19661				3			22.305	28.3889	20.9384	21.9081	18.3128	21.8029	13.3332	25.9859
		miR-NC + siPPARA	0.452502	0.115628	0.037164			3			22.472	28.5608	21.1572	21.8109	18.5186	22.2198	13.4084	25.6985
		anti-miR-20b	1.4469	0.0481819	0.0459305			3		miR-NC + siPPARA	22.5059	28.7218	21.6168	21.3182	18.8835	21.9553	13.7829	25.0349
		anti-miR-20b + siPPARA	0.554027	0.0454329	0.0458096	0.229842	8.75522e-05	3			23.1104	28.7954	21.0419	21.361	18.1653	21.7196	13.8154	24.9676
											22.48	28.506	23.1284	20.9933	17.9135	22.6061	13.8999	25.653
					vs. miR-NC	vs. miR-NC + siPPARA	vs. anti-miR-20b			anti-miR-20b	21.4846	27.3319	20.1634	21.7934	18.7548	21.2758	12.7916	25.7282
figure	Gene		mean	SEM	p value	p value	p value	n			21.8353	27.9547	20.6523	22.3072	18.2443	21.1599	13.2146	26.223
					(t-test)	(t-test)	(t-test)				21.1494	27.0357	20.4675	21.6498	19.3767	20.7117	12.7726	25.3976
3F	CPT1A	miR-NC	1	0.155086				3		anti-miR-20b + siPPARA	22.458	28.7962	22.0617	22.0857	17.999	22.3069	15.9459	25.5245
		miR-NC + siPPARA	0.506718	0.114398	0.0313302			3			22.6968	29.2475	21.748	21.6419	17.8331	22.3515	14.7918	25.6688
		anti-miR-20b	1.68286	0.0441799	0.00666028			3			22.8855	28.9941	23.3865	21.5632	18.1103	22.0561	14.3282	25.5457
		anti-miR-20b + siPPARA	0.493248	0.0306193	0.0163617	0.45746	1.23375e-05	3
					vs. miR-NC	vs. miR-NC + siPPARA	vs. anti-miR-20b
figure	Gene		mean	SEM	p value	p value	p value	n
					(t-test)	(t-test)	(t-test)
3F	ACOX1	miR-NC	1	0.101226				3
		miR-NC + siPPARA	0.376924	0.0974515	0.00569184			3
		anti-miR-20b	1.49327	0.201849	0.0471376			3
		anti-miR-20b + siPPARA	0.364993	0.111128	0.00671522	0.46977	0.0040317	3
					vs. miR-NC	vs. miR-NC + siPPARA	vs. anti-miR-20b
figure	Gene		mean	SEM	p value	p value	p value	n
					(t-test)	(t-test)	(t-test)
3F	SREBF1	miR-NC	1	0.0383264				3
		miR-NC + siPPARA	1.05759	0.264161	0.419872			3
		anti-miR-20b	0.915813	0.0369442	0.0944642			3
		anti-miR-20b + siPPARA	0.8977	0.10925	0.213414	0.30289	0.441405	3
					vs. miR-NC	vs. miR-NC + siPPARA	vs. anti-miR-20b
figure	Gene		mean	SEM	p value	p value	p value	n
					(t-test)	(t-test)	(t-test)
3F	FASN	miR-NC	1	0.0994521				3
		miR-NC + siPPARA	0.734241	0.235783	0.178838			3
		anti-miR-20b	0.820305	0.306615	0.303465			3
		anti-miR-20b + siPPARA	1.08508	0.0939029	0.283806	0.119513	0.227688	3
					vs. miR-NC	vs. miR-NC + siPPARA	vs. anti-miR-20b
figure	Gene		mean	SEM	p value	p value	p value	n
					(t-test)	(t-test)	(t-test)
3F	CD36	miR-NC	1	0.181737				3
		miR-NC + siPPARA	0.514522	0.0226322	0.0284659			3
		anti-miR-20b	1.59087	0.199695	0.046934			3
		anti-miR-20b + siPPARA	0.598637	0.0333273	0.0477843	0.0525359	0.00401918	3
					vs. miR-NC	vs. miR-NC + siPPARA	vs. anti-miR-20b
figure	Gene		mean	SEM	p value	p value	p value	n
					(t-test)	(t-test)	(t-test)
3F	FABP1	miR-NC	1	0.0754696				3
		miR-NC + siPPARA	0.483828	0.0653669	0.00332628			3
		anti-miR-20b	1.32696	0.104116	0.0319002			3
		anti-miR-20b + siPPARA	0.29782	0.0849324	0.00174134	0.0788272	0.000780796	3

## Sheet: Figure 3G
		miR-NC	miR-NC + Feno	miR-20b	miR-20b + Feno
		1.79048	2.47561	0.967949	1.12536
		2.12667	2.31164	0.821656	0.954802
		1.99541	2.38251	0.595989	0.718213
	Average	1.97085	2.38992	0.795198	0.932793
	SEM	0.0978237	0.0474776	0.108188	0.118049
	T.TEST		0.0091201	0.000643283	0.00124135
				vs miR-20b	0.219312
				vs. miR-NC + Feno	0.000165897

## Sheet: Figure 3H
Source Data - Figure 3
					vs. miR-NC	vs. miR-NC + Fenofibrate	vs. miR-20b				miR-NC	miR-NC + Fenofibrate	miR-20b	miR-20b + Fenofibrate
figure	Luciferase		mean	SEM	p value	p value	p value	n			1.00083	1.405	0.725528	0.937509
					(t-test)	(t-test)	(t-test)				1.01861	1.46473	0.707058	1.00164
3H		miR-NC	1	0.036948				3			0.963293	1.33428	0.699515	0.948625
		miR-NC + Fenofibrate	1.35248	0.0317731	1.40688e-05			3			0.996255	1.34158	0.825418	0.899476
		miR-20b	0.749436	0.0245081	0.000106035			3			0.870818	1.23329	0.712202	0.918677
		miR-20b + Fenofibrate	0.939727	0.0141823	0.0793732	1.62784e-07	2.6155e-05	3			1.15019	1.33599	0.826897	0.932433

## Sheet: Figure 3I
Source Data - Figure 3
qPCR					vs. miR-NC	vs. miR-NC + Fenofibrate	vs. miR-20b
figure	Gene		mean	SEM	p value	p value	p value	n				PPARA	CPT1A	ACOX1	SREBF1	FASN	CD36	FABP1	TBP
					(t-test)	(t-test)	(t-test)				miR-NC	27.0174	24.2172	23.9658	25.6264	23.383	21.8148	26.1807	21.8093
3I	PPARA	miR-NC	1	0.0304932				3				26.8516	23.9609	23.9436	25.2071	22.9457	22.0442	25.7136	21.5888
		miR-NC + Fenofibrate	2.02631	0.237675	0.00640843			3				26.6088	23.8437	23.6249	24.913	22.5732	21.493	25.1541	21.4956
		miR-20b	0.344502	0.0328436	6.35596e-05			3			miR-NC + Fenofibrate	26.0687	23.1791	23.0157	26.1904	23.619	21.7065	25.9828	22.1653
		miR-20b + Fenofibrate	0.816901	0.0743977	0.042523	0.00415118	0.00218523	3				26.3102	23.359	23.457	25.7624	22.8658	21.7864	25.9799	21.8149
												25.8503	23.0767	22.9805	26.0795	23.7735	21.1706	24.9361	21.6652
					vs. miR-NC	vs. miR-NC + Fenofibrate	vs. miR-20b				miR-20b	27.7105	23.4284	23.1446	24.0349	22.1833	21.2437	25.3655	20.751
figure	Gene		mean	SEM	p value	p value	p value	n				27.2252	23.7	23.7497	24.5771	22.6381	22.1496	25.633	20.7318
					(t-test)	(t-test)	(t-test)					27.2473	23.9119	23.9255	24.8855	22.5874	21.7473	25.5007	20.4692
3I	CPT1A	miR-NC	1	0.0120352				3			miR-20b + Fenofibrate	26.7699	23.5315	23.4603	25.4725	23.5217	22.6197	25.4414	21.0892
		miR-NC + Fenofibrate	2.10052	0.240139	0.00510285			3				26.6796	23.6953	23.8425	25.1893	23.2751	22.0101	24.8211	21.4292
		miR-20b	0.650672	0.0966321	0.0115084			3				26.5145	24.1549	23.9128	24.9516	23.0434	21.922	24.2282	20.9555
		miR-20b + Fenofibrate	0.866384	0.154859	0.219083	0.00622821	0.151379	3
					vs. miR-NC	vs. miR-NC + Fenofibrate	vs. miR-20b
figure	Gene		mean	SEM	p value	p value	p value	n
					(t-test)	(t-test)	(t-test)
3I	ACOX1	miR-NC	1	0.0480592				3
		miR-NC + Fenofibrate	1.96935	0.317695	0.0196417			3
		miR-20b	0.624473	0.135151	0.0294623			3
		miR-20b + Fenofibrate	0.786257	0.0955481	0.0581605	0.0117277	0.191844	3
					vs. miR-NC	vs. miR-NC + Fenofibrate	vs. miR-20b
figure	Gene		mean	SEM	p value	p value	p value	n
					(t-test)	(t-test)	(t-test)
3I	SREBF1	miR-NC	1	0.0798121				3
		miR-NC + Fenofibrate	0.703879	0.0670087	0.0233977			3
		miR-20b	0.89068	0.197715	0.317582			3
		miR-20b + Fenofibrate	0.74967	0.091452	0.0540826	0.353475	0.276355	3
					vs. miR-NC	vs. miR-NC + Fenofibrate	vs. miR-20b
figure	Gene		mean	SEM	p value	p value	p value	n
					(t-test)	(t-test)	(t-test)
3I	FASN	miR-NC	1	0.100219				3
		miR-NC + Fenofibrate	0.899576	0.181043	0.326422			3
		miR-20b	0.722944	0.104994	0.064462			3
		miR-20b + Fenofibrate	0.582108	0.0671115	0.0128537	0.0877388	0.160783	3
					vs. miR-NC	vs. miR-NC + Fenofibrate	vs. miR-20b
figure	Gene		mean	SEM	p value	p value	p value	n
					(t-test)	(t-test)	(t-test)
3I	CD36	miR-NC	1	0.0988822				3
		miR-NC + Fenofibrate	1.39452	0.136755	0.0397873			3
		miR-20b	0.54903	0.117006	0.0211145			3
		miR-20b + Fenofibrate	0.559695	0.102383	0.0182272	0.00406056	0.4743	3
					vs. miR-NC	vs. miR-NC + Fenofibrate	vs. miR-20b
figure	Gene		mean	SEM	p value	p value	p value	n
					(t-test)	(t-test)	(t-test)
3I	FABP1	miR-NC	1	0.148822				3
		miR-NC + Fenofibrate	1.24586	0.229158	0.20955			3
		miR-20b	0.567352	0.0495086	0.0254635			3
		miR-20b + Fenofibrate	1.34013	0.275416	0.169176	0.402733	0.0253833	3
