# Supplementary material for: Hepatic MIR20B promotes nonalcoholic fatty liver disease by suppressing PPARA
Source: eLife. 2021 Dec 29;10:e70472. doi: 10.7554/eLife.70472 (PMC8758141; doi:10.7554/eLife.70472)
Supplement: Figure 4—figure supplement 1—source data 1. [file elife-70472-fig4-figsupp1-data1.xlsx]

## Sheet: Figure 4 Supplement 1A
Source Data - Figure 4 Supplement
qPCR					vs. miR-NC	vs. miR-NC + OA
figure	Gene	HepG2	mean	SEM	p value	p value	n				CPT1b	CPT2	ACADM	ANGPTL4	FATP1	ACAA1	ACSL1	TBP
					(t-test)	(t-test)				miR-NC	24.5956	23.3945	25.4684	29.6357	27.0776	20.9811	21.0393	19.9953
4 Supplement 1A	CPT1B	miR-NC	1	0.197754			3				24.9943	24.4593	25.9904	28.0304	28.4518	21.3249	22.0714	20.906
		miR-NC + OA	0.377015	0.111835	0.0258947		3				24.9802	24.856	26.3793	28.2053	28.3292	21.7032	21.6225	21.386
		miR-20b	0.425778	0.09064	0.0288006		3			miR-NC OA	25.59	24.89	26.31	26.59	28.23	21.75	21.6	20.808
		miR-20b + OA	0.112723	0.0463591	0.00599181	0.0472082	3				25.74	25.22	26.28	25.87	28.32	21.54	20.97	19.9895
											26.02	24.66	26.12	26.47	28	21.36	21.11	19.8619
					vs. miR-NC	vs. miR-NC + OA				miR-20b-5p	26.9789	25.3068	27.5464	27.8287	29.7987	22.7886	23.4215	21.7653
figure	Gene	HepG2	mean	SEM	p value	p value	n				25.6166	24.078	27.1848	27.4004	28.1134	22.9077	21.3243	19.6434
					(t-test)	(t-test)					24.7714	24.8461	27.44	27.8436	28.502	22.0284	21.9044	19.9338
4 Supplement 1A	CPT2	miR-NC	1	0.0307886			3			miR-20b-5p OA	28.2	24.45	26.25	25.21	27.08	21.25	20.63	18.5641
		miR-NC + OA	0.45012	0.106968	0.00390823		3				25.61	24.2	26.43	25.29	27.69	21.49	20.75	19.0004
		miR-20b	0.611862	0.17585	0.0476838		3				26.06	25.26	26.01	24.89	27.64	21.66	20.98	19.2817
		miR-20b + OA	0.221998	0.0402072	5.23668e-05	0.0583072	3
					vs. miR-NC	vs. miR-NC + OA
figure	Gene	HepG2	mean	SEM	p value	p value	n
					(t-test)	(t-test)
4 Supplement 1A	ACADM	miR-NC	1	0.0970767			3
		miR-NC + OA	0.574555	0.109731	0.0219732		3
		miR-20b	0.348447	0.15293	0.0114098		3
		miR-20b + OA	0.240927	0.0501801	0.00112821	0.0252946	3
					vs. miR-NC	vs. miR-NC + OA
figure	Gene	HepG2	mean	SEM	p value	p value	n
					(t-test)	(t-test)
4 Supplement 1A	FATP1	miR-NC	1	0.11925			3
		miR-NC + OA	0.598711	0.121414	0.0389163		3
		miR-20b	0.444522	0.0527968	0.00653032		3
		miR-20b + OA	0.393209	0.0259638	0.00382052	0.0866182	3
					vs. miR-NC	vs. miR-NC + OA
figure	Gene	HepG2	mean	SEM	p value	p value	n
					(t-test)	(t-test)
4 Supplement 1A	ACAA1	miR-NC	1	0.133528			3
		miR-NC + OA	0.591523	0.0842346	0.0304283		3
		miR-20b	0.403877	0.166364	0.0245441		3
		miR-20b + OA	0.255794	0.0156967	0.00260326	0.00863698	3
					vs. miR-NC	vs. miR-NC + OA
figure	Gene	HepG2	mean	SEM	p value	p value	n
					(t-test)	(t-test)
4 Supplement 1A	ACSL1	miR-NC	1	0.216283			3
		miR-NC + OA	0.845876	0.0762993	0.269197		3
		miR-20b	0.496898	0.0334958	0.0415276		3
		miR-20b + OA	0.474471	0.036311	0.0373281	0.00586665	3

## Sheet: Figure 4 Supplement 1B
Source Data - Figure 4 Supplement
qPCR					vs. miR-NC	vs. miR-NC + OA
figure	Gene	HepG2	mean	SEM	p value	p value	n				CPT1b	CPT2	ACADM	ANGPTL4	FATP1	ACAA1	ACSL1	TBP
					(t-test)	(t-test)				miR-NC	27.28	25.95	20.84	32.02	24.39	24.38	26	19.9953
4 Supplement 1B	CPT1B	miR-NC	1	0.152626			3				27.66	26.18	21.14	31.83	24.66	24.73	26.25	20.906
		miR-NC + OA	0.541468	0.108389	0.0352434		3				27.88	26.72	21.35	32.47	25.5	25.27	26.8	21.386
		anti-miR-20b	1.43286	0.0991566	0.0380659		3			miR-NC OA	28.02	26.73	22.03	30.62	25.37	26.11	26.92	20.808
		anti-miR-20b + OA	1.01675	0.119966	0.467701	0.0212021	3				27.91	27.27	21.94	30.79	25.62	25.45	25.71	19.9895
											27.97	27.89	22.08	31.48	26.17	25.75	25.87	19.8619
					vs. miR-NC	vs. miR-NC + OA				anti-miR-20b	27.04	24.93	20.54	31.42	24.22	23.9	25.84	20.7944
figure	Gene	HepG2	mean	SEM	p value	p value	n				27.42	25.74	20.39	31.64	24.45	24.14	26.09	20.9262
					(t-test)	(t-test)					26.98	25.74	20.79	31.11	24.31	24	25.61	20.8304
4 Supplement 1B	CPT2	miR-NC	1	0.138403			3			anti-miR-20b OA	27.92	26.33	21.91	30.64	26.16	24.9	26.49	21.3827
		miR-NC + OA	0.400784	0.1735	0.0270501		3				27.65	25.94	21.44	30.79	25.85	24.21	26.31	20.9111
		anti-miR-20b	1.88321	0.338062	0.0364683		3				28.04	25.88	21.29	30.46	25.49	24.27	26.53	20.9004
		anti-miR-20b + OA	1.41911	0.0232565	0.0202429	0.00217364	3
					vs. miR-NC	vs. miR-NC + OA
figure	Gene	HepG2	mean	SEM	p value	p value	n
					(t-test)	(t-test)
4 Supplement 1B	ACADM	miR-NC	1	0.168557			3
		miR-NC + OA	0.370973	0.0804066	0.0140449		3
		anti-miR-20b	1.50943	0.151395	0.0438971		3
		anti-miR-20b + OA	0.884034	0.0287176	0.267421	0.00193054	3
					vs. miR-NC	vs. miR-NC + OA
figure	Gene	HepG2	mean	SEM	p value	p value	n
					(t-test)	(t-test)
4 Supplement 1B	FATP1	miR-NC	1	0.129434			3
		miR-NC + OA	0.418825	0.149082	0.0211168		3
		anti-miR-20b	1.50304	0.0296278	0.00964745		3
		anti-miR-20b + OA	0.616472	0.0432327	0.0241467	0.135939	3
					vs. miR-NC	vs. miR-NC + OA
figure	Gene	HepG2	mean	SEM	p value	p value	n
					(t-test)	(t-test)
4 Supplement 1B	ACAA1	miR-NC	1	0.115163			3
		miR-NC + OA	0.34876	0.0402794	0.00296689		3
		anti-miR-20b	1.79957	0.0393043	0.00138801		3
		anti-miR-20b + OA	1.53425	0.0675116	0.00805123	5.63536e-05	3
					vs. miR-NC	vs. miR-NC + OA
figure	Gene	HepG2	mean	SEM	p value	p value	n
					(t-test)	(t-test)
4 Supplement 1B	ACSL1	miR-NC	1	0.133909			3
		miR-NC + OA	0.769233	0.0640487	0.0975025		3
		anti-miR-20b	1.48602	0.119477	0.0268181		3
		anti-miR-20b + OA	1.14551	0.120735	0.232442	0.0256034	3
