# Supplementary material for: Hepatic MIR20B promotes nonalcoholic fatty liver disease by suppressing PPARA
Source: eLife. 2021 Dec 29;10:e70472. doi: 10.7554/eLife.70472 (PMC8758141; doi:10.7554/eLife.70472)
Supplement: Figure 4—figure supplement 2—source data 1. [file elife-70472-fig4-figsupp2-data1.xlsx]

## Sheet: Figure 4 Supplement 2B
Source Data - Figure 4 Supplement
					vs. miR-NC	vs. miR-NC + OA				miR-NC	miR-NC + OA	miR-20b	miR-20b + OA
figure		Primary Hepatoyctes	mean	SEM	p value	p value	n			45.8077	96.4435	50.206	119.594
					(t-test)	(t-test)				44.4883	95.7238	44.4963	106.352
4 Supplement B	Cholesterol	miR-NC	44.9974	0.409593			3			44.6962	81.6894	44.7921	141.617
		miR-NC + OA	91.2855	4.80258	0.000328605		3
		miR-20b	46.4981	1.85589	0.236959		3
		miR-20b + OA	122.521	10.285	0.000832129	0.0256406	3

## Sheet: Figure 4 Supplement 2C
Source Data - Figure 4 Supplement
					vs. miR-NC	vs. miR-NC + OA
figure		Primary Hepatocytes	Average	SEM	p value	p value	n			miR-NC	miR-NC + OA	miR-20b	miR-20b + OA
					(t-test)	(t-test)				51.8328	211.699	65.0328	229.653
4 Supplement C	Triglyceride	miR-NC	59.6995	3.93338			3			63.6662	155.133	52.6662	208.573
		miR-NC + OA	171.605	20.1532	0.0027534		3			63.5995	147.983	52.8328	213.533
		miR-20b	56.8439	4.09473	0.320723		3
		miR-20b + OA	217.253	6.36319	1.50208e-05	0.0484482	3

## Sheet: Figure 4 Supplement 2D
Source Data - Figure 4 Supplement
qPCR					vs. miR-NC	vs. miR-NC + OA	vs. miR-20b					miR-20b	U6
figure	Gene	Primary Hepatocytes	Average	SEM	p value	p value	p value	n			miR-NC	28.4308	25.6048
					(t-test)	(t-test)	(t-test)					28.4213	26.193
4 Supplement D	miR-20b	miR-NC	1	0.232824				3				27.7712	26.1345
		miR-NC + OA	4.18631	0.274981	0.000451353			3			miR-NC + OA	25.902	25.6178
		miR-20b	2.75281	0.644257	0.0313617			3				26.3173	26.2974
		miR-20b + OA	5.62532	0.198772	5.59263e-05	0.0066259	0.00652433	3				25.9091	25.9414
											miR-20b	27.0747	26.9387
												26.935	25.9139
												26.9209	25.7951
											miR-20b + OA	26.1137	26.3501
												25.9495	26.3396
												26.0969	26.4913

## Sheet: Figure 4 Supplement 2E
Source Data - Figure 4 Supplement
qPCR					vs. miR-NC	vs. miR-NC + OA
figure	Gene	Primary Hepatocytes	mean	SEM	p value	p value	n				Ppara	Cpt1a	Acox1	Srebf1	fasn	Cd36	Fabp1	Tbp
					(t-test)	(t-test)				miR-NC	25.0383	22.584	24.1997	23.3249	27.8479	22.8765	19.8504	25.733
4 Supplement E	Ppara	miR-NC	1	0.0516219			3				24.9006	22.4578	23.9088	23.8392	26.7892	23.4495	19.3243	25.7989
		miR-NC + OA	0.492548	0.0156298	0.000355665		3				24.6449	22.5593	24.3533	23.5921	27.1645	22.8616	19.4438	25.5876
		miR-20b	0.56251	0.159019	0.0295003		3			miR-NC + OA	25.4472	23.1906	24.159	22.4417	25.894	23.0035	19.8799	25.3105
		miR-20b + OA	0.355523	0.0310818	0.000216483	0.00848989	3				25.2958	22.9817	24.1371	22.2375	26.0979	22.9264	19.9707	25.0294
											24.9641	22.3319	24.0799	21.8688	25.662	22.4677	19.9235	24.8453
					vs. miR-NC	vs. miR-NC + OA				miR-20b	24.8056	22.1431	23.6016	22.5283	26.1265	22.0674	19.2304	24.1501
figure	Gene	Primary Hepatocytes	mean	SEM	p value	p value	n				24.7808	22.4949	24.295	22.6587	26.6511	23.032	19.7178	25.4362
					(t-test)	(t-test)					24.9642	22.3788	24.1886	22.871	26.2003	22.8307	19.8436	24.6956
4 Supplement E	Cpt1a	miR-NC	1	0.0637733			3			miR-20b + OA	25.9127	23.1165	25.522	21.9737	25.4983	23.205	20.4153	25.0122
		miR-NC + OA	0.522445	0.0545221	0.0023532		3				25.5075	22.8748	25.2545	22.6948	26.1029	23.6991	20.5926	25.0477
		miR-20b	0.614194	0.121042	0.0239158		3				26.1359	23.5904	24.9004	22.5457	25.9357	23.5538	20.8363	25.5336
		miR-20b + OA	0.444573	0.0270199	0.000655907	0.134913	3
					vs. miR-NC	vs. miR-NC + OA
figure	Gene	Primary Hepatocytes	mean	SEM	p value	p value	n
					(t-test)	(t-test)
4 Supplement E	Acox1	miR-NC	1	0.13181			3
		miR-NC + OA	0.645257	0.051778	0.0332058		3
		miR-20b	0.56839	0.0853936	0.0257355		3
		miR-20b + OA	0.348418	0.0870735	0.00727868	0.0214039	3
					vs. miR-NC	vs. miR-NC + OA
figure	Gene	Primary Hepatocytes	mean	SEM	p value	p value	n
					(t-test)	(t-test)
4 Supplement E	Srebf1	miR-NC	1	0.104029			3
		miR-NC + OA	1.6762	0.0625194	0.00254277		3
		miR-20b	1.0221	0.270705	0.47146		3
		miR-20b + OA	1.61229	0.225743	0.0347199	0.399246	3
					vs. miR-NC	vs. miR-NC + OA
figure	Gene	Primary Hepatocytes	mean	SEM	p value	p value	n
					(t-test)	(t-test)
4 Supplement E	Fasn	miR-NC	1	0.222685			3
		miR-NC + OA	1.60073	0.154348	0.0454494		3
		miR-20b	0.969963	0.143385	0.457585		3
		miR-20b + OA	1.82512	0.240138	0.0326967	0.237894	3
					vs. miR-NC	vs. miR-NC + OA
figure	Gene	Primary Hepatocytes	mean	SEM	p value	p value	n
					(t-test)	(t-test)
4 Supplement E	Cd36	miR-NC	1	0.100874			3
		miR-NC + OA	0.761876	0.0425313	0.0476282		3
		miR-20b	0.694921	0.0764224	0.036751		3
		miR-20b + OA	0.52707	0.0652563	0.00850522	0.0196885	3
					vs. miR-NC	vs. miR-NC + OA
figure	Gene	Primary Hepatocytes	mean	SEM	p value	p value	n
					(t-test)	(t-test)
4 Supplement E	Fabp1	miR-NC	1	0.119491			3
		miR-NC + OA	0.488333	0.0530759	0.00867211		3
		miR-20b	0.511334	0.105697	0.0187713		3
		miR-20b + OA	0.329652	0.0159299	0.00256025	0.0228835	3
