# Supplementary material for: Hepatic MIR20B promotes nonalcoholic fatty liver disease by suppressing PPARA
Source: eLife. 2021 Dec 29;10:e70472. doi: 10.7554/eLife.70472 (PMC8758141; doi:10.7554/eLife.70472)
Supplement: Figure 4—figure supplement 3—source data 1. [file elife-70472-fig4-figsupp3-data1.xlsx]

## Sheet: Figure 4 Supplement 3A
Source Data - Figure 4 Supplement
qPCR					vs. miR-NC
figure	Gene	HepG2	mean	SEM	p value	n
					(t-test)
4 Supplement A	HMGCL	miiR-NC	1	0.27448		3
		miR-20b	0.650019	0.061746	0.140713	3
					vs. miR-NC
figure	Gene	HepG2	mean	SEM	p value	n
					(t-test)
4 Supplement A	ACAT1	miiR-NC	1	0.25778		3
		miR-20b	0.858998	0.158762	0.332815	3
					vs. miR-NC
figure	Gene	HepG2	mean	SEM	p value	n
					(t-test)
4 Supplement A	ACAT2	miiR-NC	1	0.170265		3
		miR-20b	0.986409	0.111201	0.476412	3

## Sheet: Figure 4 Supplement 3B
Source Data - Figure 4 Supplement
					vs. miR-NC
figure	Gene	HepG2	Average	SEM	p value	n
					(t-test)
4 Supplement B	β-Hydroxy butyrate	miR-NC	1	0.0884929		3
		miR-20b	0.941176	0.0751372	0.319506	3

## Sheet: Figure 4 Supplement 3C
Source Data - Figure 4 Supplement
qPCR					vs. miR-NC
figure	Gene	HepG2	mean	SEM	p value	n
					(t-test)
4 Supplement C	HMGCL	miiR-NC	1	0.27448		3
		anti-miR-20b	2.26694	0.0408798	0.0051482	3
					vs. miR-NC
figure	Gene	HepG2	mean	SEM	p value	n
					(t-test)
4 Supplement C	ACAT1	miiR-NC	1	0.25778		3
		anti-miR-20b	0.87479	0.140939	0.345954	3
					vs. miR-NC
figure	Gene	HepG2	mean	SEM	p value	n
					(t-test)
4 Supplement C	ACAT2	miiR-NC	1	0.341042		3
		anti-miR-20b	0.830218	0.055542	0.324456	3

## Sheet: Figure 4 Supplement 3D
Source Data - Figure 4 Supplement
					vs. miR-NC
figure	Gene	HepG2	Average	SEM	p value	n
					(t-test)
4 Supplement D	β-Hydroxy butyrate	miR-NC	1	0.0884929		3
		anti-miR-20b	1.16409	0.0323229	0.0782645	3
