# Supplementary material for: Hepatic MIR20B promotes nonalcoholic fatty liver disease by suppressing PPARA
Source: eLife. 2021 Dec 29;10:e70472. doi: 10.7554/eLife.70472 (PMC8758141; doi:10.7554/eLife.70472)
Supplement: Figure 4—figure supplement 4—source data 1. [file elife-70472-fig4-figsupp4-data1.xlsx]

## Sheet: Figure 4 Supplement 4B
Source Data - Figure 4 Supplement
					vs. miR-NC	vs. miR-NC + OA	vs. anti-miR-20b + OA
figure	Gene	HepG2	Average	SEM	p value	p value	p value	n
					(t-test)	(t-test)	(t-test)
4 Supplement 4B	Triglyceride	miR-NC	45.5031	3.24386				3		miR-NC	miR-NC + OA	anti-miR-20b	anti-miR-20b + OA
		miR-NC + OA	104.658	2.41961	0.0219029			3		51.3178	108.99	36.7218	85.3158
		anti-miR-20b	36.9591	2.36665	0.0502284			3		40.1038	100.624	41.1718	89.7658
		anti-miR-20b + OA	92.0798	4.71728	0.000620895	0.0383016	0.000237434	3		45.0878	104.362	32.9838	101.158

## Sheet: Figure 4 Supplement 4C
Source Data - Figure 4 Supplement
					vs. miR-NC	vs. miR-NC + OA	vs. anti-miR-20b + OA
figure	Gene	HepG2	Average	SEM	p value	p value	p value	n
					(t-test)	(t-test)	(t-test)			miR-NC	miR-NC + OA	anti-miR-20b	anti-miR-20b + OA
4 Supplement 4C	Cholesterol	miR-NC	53.6667	5.5054				3		63.58	126.04	48.38	89.98
		miR-NC + OA	123.753	8.11192	0.0498921			3		44.56	108.7	41.9	113.6
		anti-miR-20b	42.4067	3.31215	0.0772777			3		52.86	136.52	36.94	98.54
		anti-miR-20b + OA	100.707	6.90403	0.00298849	0.0482515	0.000798744	3

## Sheet: Figure 4 Supplement 4E
Source Data - Figure 4 Supplement
					vs. miR-NC	vs. miR-NC + OA	vs. anti-miR-20b + OA
figure	Gene	Primary Hepatocytes	Average	SEM	p value	p value	p value	n
					(t-test)	(t-test)	(t-test)			miR-NC	miR-NC + OA	anti-miR-20b	anti-miR-20b + OA
4 Supplement 4E	Triglyceride	miR-NC	56.7106	1.86551				3		54.0328	153.6	51.9662	100.8
		miR-NC + OA	167.8	10.0419	0.000202809			3		60.2995	187.199	70.3662	151.199
		anti-miR-20b	57.1662	6.64931	0.475286			3		55.7995	162.599	49.1662	122.199
		anti-miR-20b + OA	124.733	14.6043	0.00493996	0.0359939	0.00678972	3

## Sheet: Figure 4 Supplement 4F
Source Data - Figure 4 Supplement
					vs. miR-NC	vs. miR-NC + OA	vs. anti-miR-20b + OA
figure	Gene	Primary Hepatocytes	Average	SEM	p value	p value	p value	n
					(t-test)	(t-test)	(t-test)				miR-NC	miR-NC + OA	anti-miR-20b	anti-miR-20b + OA
4 Supplement 4F	Cholesterol	miR-NC	45.7331	0.999358				3			44.5442	96.8513	44.4563	85.3199
		miR-NC + OA	108.159	8.22877	0.000832386			3			44.9361	103.457	48.8545	78.7146
		anti-miR-20b	46.3195	1.31334	0.370139			3			47.719	124.168	45.6478	73.9005
		anti-miR-20b + OA	79.3117	3.31	0.000314678	0.0156526	0.000377383	3

## Sheet: Figure 4 Supplement 4G
Source Data - Figure 4 Supplement
qPCR					vs. miR-NC	vs. miR-NC + OA	vs. anti-miR-20b
figure	Gene	Primary Hepatocytes	mean	SEM	p value	p value	p value	n			miR-20b	U6
					(t-test)	(t-test)	(t-test)			miR-NC	27.1446	24.8584
4 Supplement 4G	miR-20b	miR-NC	1	0.0324656				3			26.9698	24.8338
		miR-NC + OA	4.92168	0.440408	0.00044413			3			27.0277	24.8756
		anti-miR-20b	0.61111	0.0646676	0.00289512			3		miR-NC + OA	24.9535	25.0109
		anti-miR-20b + OA	2.43306	0.383755	0.0102282	0.00652539	0.00471797	3			25.5779	25.9132
											25.2527	25.154
										anti-miR-20b	27.6289	24.4532
											27.4478	24.8003
											27.9563	25.0301
										anti-miR-20b + OA	26.824	26.0813
											26.9097	26.2561
											27.1436	25.6955

## Sheet: Figure 4 Supplement 4H
Source Data - Figure 4 Supplement
qPCR					vs. miR-NC	vs. miR-NC + OA	vs. anti-miR-20b
figure	Gene	Primary Hepatocytes	mean	SEM	p value	p value	p value	n			Ppara	Cpt1a	Acox1	Srebf1	fasn	Cd36	Fabp1	TBP
					(t-test)	(t-test)	(t-test)			miR-NC	25.0429	23.5303	22.0231	26.5766	24.2392	24.0793	27.5375	25.0283
4 Supplement 4H	Ppara	miR-NC	1	0.0774182				3			24.6168	23.7724	22.2415	27.2144	24.1346	24.1388	27.1698	24.9448
		miR-NC + OA	0.524305	0.0951915	0.0089439			3			24.8777	23.5703	22.1508	27.1492	24.5568	24.2001	28.1351	25.2203
		anti-miR-20b	1.51654	0.120632	0.0113418			3		miR-NC + OA	25.9426	24.447	23.0768	25.9677	23.3907	25.2184	27.9121	24.6002
		anti-miR-20b + OA	0.906028	0.141737	0.295938	0.0445207	0.0152477	3			25.2453	23.5244	23.3536	26.124	23.349	24.4948	28.1443	24.7113
											25.6674	24.3798	22.8658	26.2839	23.5402	24.9431	28.0777	25.2658
					vs. miR-NC	vs. miR-NC + OA	vs. anti-miR-20b			anti-miR-20b	24.3702	23.1407	21.5707	27.1227	24.1869	23.6817	26.715	24.9492
figure	Gene	Primary Hepatocytes	mean	SEM	p value	p value	p value	n			24.2382	22.8742	21.946	26.9158	25.398	23.8554	27.1508	25.1677
					(t-test)	(t-test)	(t-test)				24.1987	23.1698	22.0262	26.5346	24.4778	23.4203	26.6886	25.1469
4 Supplement 4H	Cpt1a	miR-NC	1	0.0945372				3		anti-miR-20b +OA	24.9272	23.2441	22.0769	25.8736	23.6141	23.6852	26.9286	24.71
		miR-NC + OA	0.637317	0.124164	0.0403896			3			24.4635	23.3788	22.5767	26.3523	23.4004	24.4486	26.7055	24.9389
		anti-miR-20b	1.50209	0.151019	0.0239612			3			24.9508	24.1223	22.3243	26.4125	23.5236	23.2676	27.1244	24.8499
		anti-miR-20b + OA	0.896608	0.147313	0.293246	0.124787	0.0227342	3
					vs. miR-NC	vs. miR-NC + OA	vs. anti-miR-20b
figure	Gene	Primary Hepatocytes	mean	SEM	p value	p value	p value	n
					(t-test)	(t-test)	(t-test)
4 Supplement 4H	Acox1	miR-NC	1	0.0753451				3
		miR-NC + OA	0.467174	0.112195	0.00846158			3
		anti-miR-20b	1.23935	0.0649617	0.0369383			3
		anti-miR-20b + OA	0.745693	0.0402658	0.020434	0.0398401	0.00147924	3
					vs. miR-NC	vs. miR-NC + OA	vs. anti-miR-20b
figure	Gene	Primary Hepatocytes	mean	SEM	p value	p value	p value	n
					(t-test)	(t-test)	(t-test)
4 Supplement 4H	Srebf1	miR-NC	1	0.144229				3
		miR-NC + OA	1.5481	0.13876	0.0259914			3
		anti-miR-20b	1.11035	0.171252	0.323969			3
		anti-miR-20b + OA	1.42915	0.116931	0.0409565	0.273971	0.099506	3
					vs. miR-NC	vs. miR-NC + OA	vs. anti-miR-20b
figure	Gene	Primary Hepatocytes	mean	SEM	p value	p value	p value	n
					(t-test)	(t-test)	(t-test)
4 Supplement 4H	Fasn	miR-NC	1	0.0312529				3
		miR-NC + OA	1.61696	0.176478	0.0131179			3
		anti-miR-20b	0.817039	0.157138	0.158592			3
		anti-miR-20b + OA	1.49052	0.131243	0.0110233	0.29806	0.0151152	3
					vs. miR-NC	vs. miR-NC + OA	vs. anti-miR-20b
figure	Gene	Primary Hepatocytes	mean	SEM	p value	p value	p value	n
					(t-test)	(t-test)	(t-test)
4 Supplement 4H	Cd36	miR-NC	1	0.0431176				3
		miR-NC + OA	0.536865	0.0981338	0.00621999			3
		anti-miR-20b	1.43686	0.151853	0.0252319			3
		anti-miR-20b + OA	1.12736	0.242973	0.316501	0.0436566	0.170419	3
					vs. miR-NC	vs. miR-NC + OA	vs. anti-miR-20b
figure	Gene	Primary Hepatocytes	mean	SEM	p value	p value	p value	n
					(t-test)	(t-test)	(t-test)
4 Supplement 4H	Fabp1	miR-NC	1	0.134917				3
		miR-NC + OA	0.642882	0.0886547	0.0457059			3
		anti-miR-20b	1.7054	0.150374	0.0125428			3
		anti-miR-20b + OA	1.37015	0.159797	0.0757276	0.00820227	0.100633	3

## Sheet: Figure 4 Supplement 4I
Source Data - Figure 4 Supplement
qPCR					vs. miR-NC	vs. miR-NC + OA	vs. anti-miR-20b + OA					PPARA	FASN	TBP
figure	Gene	HepG2	mean	SEM	p value	p value	p value	n			shNC	28.73	25.56	26.85
					(t-test)	(t-test)	(t-test)					28.24	25.42	26.56
4 Supplement 4I	PPARA	shNC	1	0.0654541				3				27.65	24.02	25.65
		shNC OA	0.562458	0.0513461	0.00312827			3			shNC OA	27.96	22.81	25.01
		anti-miR-20b	1.679	0.291585	0.0427642			3				28.16	22.98	25.67
		anti-miR-20b OA	0.95767	0.0475607	0.314246	0.00242194		3				28.13	23.04	25.5
		shPPARA #1	0.563095	0.0868641	0.00795196			3			anti-miR-20b	27.1	24.51	25.94
		shPPARA #1 OA	0.335126	0.0131662	0.000285573	0.0063797	0.000113656	3				27.53	24.73	26.83
		anti-miR-20b + shPPARA #1	0.672774	0.0368231	0.0060446			3				27.32	24.69	25.75
		anti-miR-20b + shPPARA #1 OA	0.26651	0.0328021	0.000278996	0.00414796	0.000139899	3			anti-miR-20b OA	27.59	23.15	25.74
		shPPARA #3	0.580386	0.127732	0.0215439			3				27.7	23.28	25.64
		shPPARA #3 OA	0.383268	0.0654567	0.00131829	0.0487762	0.00103973	3				27.66	23.02	25.83
		anti-miR-20b + shPPARA #3	0.548251	0.0998462	0.00968548			3			shPPARA #1	28.65	24.46	26.05
		anti-miR-20b + shPPARA #3 OA	0.380558	0.0586758	0.00106901	0.0399964	0.000788021	3				28.51	24.58	26.14
												28.99	23.91	25.82
					vs. miR-NC	vs. miR-NC + OA	vs. anti-miR-20b + OA				shPPARA #1 OA	28.05	21.85	24.6
figure	Gene	HepG2	mean	SEM	p value	p value	p value	n				28.49	22.54	25.17
					(t-test)	(t-test)	(t-test)					28.5	22.13	24.99
4 Supplement 4I	FASN	shNC	1	0.103103				3			anti-miR-20b + shPPARA #1	27.55	23.64	25
		shNC OA	2.13709	0.207835	0.0040186			3				27	22.97	24.72
		anti-miR-20b	1.17074	0.254313	0.283761			3				27.63	23.48	25.19
		anti-miR-20b OA	2.34595	0.21025	0.00227095	0.259437		3			anti-miR-20b + shPPARA #1 OA	29.19	22.65	25.12
		shPPARA #1	1.25476	0.100775	0.0759826			3				29.34	23.26	25.54
		shPPARA #1 OA	2.6055	0.119645	0.000263718	0.0612503	0.171858	3				28.97	22.82	25.51
		anti-miR-20b + shPPARA #1	1.18825	0.0974868	0.127644			3			shPPARA #3	28.95	24.39	25.64
		anti-miR-20b + shPPARA #1 OA	2.17586	0.17913	0.00235703	0.447229	0.285675	3				28.59	24.63	26.43
		shPPARA #3	1.20642	0.142531	0.15286			3				28.94	24.49	26.29
		shPPARA #3 OA	1.97752	0.267598	0.0135302	0.331105	0.16994	3			shPPARA #3 OA	28.99	23.23	25.29
		anti-miR-20b + shPPARA #3	1.53639	0.448132	0.154114			3				29.37	23.4	26.09
		anti-miR-20b + shPPARA #3 OA	2.33659	0.222651	0.00275802	0.274109	0.488546	3				29.09	24.02	26.25
											anti-miR-20b + shPPARA #3	29.16	25.06	25.81
												28.88	24.22	26.48
												29.42	24.42	26.86
											anti-miR-20b + shPPARA #3 OA	28.97	23.57	26.07
												29.24	23.15	25.55
												29.91	23.83	26.67
