# Supplementary material for: Hepatic MIR20B promotes nonalcoholic fatty liver disease by suppressing PPARA
Source: eLife. 2021 Dec 29;10:e70472. doi: 10.7554/eLife.70472 (PMC8758141; doi:10.7554/eLife.70472)
Supplement: Figure 4—figure supplement 5—source data 1. [file elife-70472-fig4-figsupp5-data1.xlsx]

## Sheet: Figure 4 Supplement 5A
Source Data - Figure 4 Supplement
qPCR		Source Data - Figure 4 Supplement				vs. miR-NC + OA
figure	Gene	HepG2	mean	SEM	p value	p value	n
					(t-test)	(t-test)				FATP2	FATP3	FATP4	FATP5	FATP6	TBP
4 Supplement 5A	FATP2	miR-NC	1	0.288575			3			23.23	22.4026	21.31	21.7323	22.4001	19.9953
		miR-NC + OA	0.87205	0.317975	0.39028		3			22.71	23.4106	21.82	22.0542	23.3741	20.906
		miR-20b	1.02288	0.731973	0.489098		3			22.95	24.1378	21.57	22.9106	23.684	21.386
		miR-20b + OA	0.744407	0.189818	0.250196	0.373847	3			22.28	23.8768	20.95	21.6838	22.826	20.808
										22.48	22.5913	19.96	21.8133	23.1037	19.9895
					vs. miR-NC	vs. miR-NC + OA				23.2	22.9826	20.97	22.069	23.1289	19.8619
figure	Gene	HepG2	mean	SEM	p value	p value	n			22.49	24.2351	22.27	22.5088	23.8229	21.7653
					(t-test)	(t-test)				23.11	22.6998	21.29	21.6369	23.7406	19.6434
4 Supplement 5A	FATP3	miR-NC	1	0.0692389			3			24.2	22.7988	21.79	22.481	22.7385	19.9338
		miR-NC + OA	0.777262	0.093141	0.0636938		3			22.03	21.5822	19.27	20.1745	20.7674	18.5641
		miR-20b	0.853455	0.104921	0.154243		3			21.24	22.5605	20.67	20.057	21.3178	19.0004
		miR-20b + OA	0.664073	0.0856213	0.0190007	0.210769	3			21.33	22.197	21.13	20.872	21.6195	19.2817
					vs. miR-NC	vs. miR-NC + OA
figure	Gene	HepG2	mean	SEM	p value	p value	n
					(t-test)	(t-test)
4 Supplement 5A	FATP4	miR-NC	1	0.236439			3
		miR-NC + OA	1.31873	0.280922	0.21717		3
		miR-20b	0.717266	0.225441	0.217806		3
		miR-20b + OA	0.664722	0.175728	0.159307	0.0598281	3
					vs. miR-NC	vs. miR-NC + OA
figure	Gene	HepG2	mean	SEM	p value	p value	n
					(t-test)	(t-test)
4 Supplement 5A	FATP5	miR-NC	1	0.12186			3
		miR-NC + OA	0.950137	0.273835	0.437971		3
		miR-20b	0.927879	0.357097	0.428863		3
		miR-20b + OA	1.03787	0.13744	0.423355	0.394412	3
					vs. miR-NC	vs. miR-NC + OA
figure	Gene	HepG2	mean	SEM	p value	p value	n
					(t-test)	(t-test)
4 Supplement 5A	FATP6	miR-NC	1	0.0346632			3
		miR-NC + OA	0.813843	0.240148	0.242865		3
		miR-20b	0.771065	0.274996	0.227619		3
		miR-20b + OA	1.07449	0.0315528	0.0936043	0.171226	3

## Sheet: Figure 4 Supplement 5B
Source Data - Figure 4 Supplement
qPCR					vs. miR-NC	vs. miR-NC + OA
figure	Gene	HepG2	mean	SEM	p value	p value	n			FATP2	FATP3	FATP4	FATP5	FATP6	TBP
					(t-test)	(t-test)				23.23	22.4026	21.31	21.7323	22.4001	19.9953
4 Supplement 5B	FATP2	miR-NC	1	0.288575			3			22.71	23.4106	21.82	22.0542	23.3741	20.906
		miR-NC + OA	0.87205	0.317975	0.39028		3			22.95	24.1378	21.57	22.9106	23.684	21.386
		anti-miR-20b	1.02786	0.178573	0.469254		3			22.28	23.8768	20.95	21.6838	22.826	20.808
		anti-miR-20b + OA	1.18502	0.0515898	0.281104	0.193142	3			22.48	22.5913	19.96	21.8133	23.1037	19.9895
										23.2	22.9826	20.97	22.069	23.1289	19.8619
					vs. miR-NC	vs. miR-NC + OA				23.3	23.2296	20.73	22.9042	23.3597	20.7944
figure	Gene	HepG2	mean	SEM	p value	p value	n			22.54	23.4712	21.6	22.4042	23.1566	20.9262
					(t-test)	(t-test)				22.84	22.7807	22.35	22.5016	23.5435	20.8304
4 Supplement 5B	FATP3	miR-NC	1	0.0692389			3			23.09	22.8262	21.27	22.564	23.4945	21.3827
		miR-NC + OA	0.777262	0.093141	0.0636938		3			22.67	23.7533	21	23.3217	23.9166	20.9111
		anti-miR-20b	1.19843	0.158764	0.157917		3			22.82	23.6808	21.29	23.0494	24.0406	20.9004
		anti-miR-20b + OA	1.2718	0.438878	0.286883	0.1661	3
					vs. miR-NC	vs. miR-NC + OA
figure	Gene	HepG2	mean	SEM	p value	p value	n
					(t-test)	(t-test)
4 Supplement 5B	FATP4	miR-NC	1	0.236439			3
		miR-NC + OA	1.31873	0.280922	0.21717		3
		anti-miR-20b	1.11493	0.335154	0.396608		3
		anti-miR-20b + OA	1.53607	0.152192	0.0646371	0.266846	3
					vs. miR-NC	vs. miR-NC + OA
figure	Gene	HepG2	mean	SEM	p value	p value	n
					(t-test)	(t-test)
4 Supplement 5B	FATP5	miR-NC	1	0.12186			3
		miR-NC + OA	0.950137	0.273835	0.437971		3
		anti-miR-20b	0.823376	0.101773	0.164145		3
		anti-miR-20b + OA	0.777715	0.215166	0.209756	0.323246	3
					vs. miR-NC	vs. miR-NC + OA
figure	Gene	HepG2	mean	SEM	p value	p value	n
					(t-test)	(t-test)
4 Supplement 5B	FATP6	miR-NC	1	0.0346632			3
		miR-NC + OA	0.813843	0.240148	0.242865		3
		anti-miR-20b	0.933083	0.0947568	0.271732		3
		anti-miR-20b + OA	0.819168	0.196879	0.208422	0.493571	3
