# Supplementary material for: Hepatic MIR20B promotes nonalcoholic fatty liver disease by suppressing PPARA
Source: eLife. 2021 Dec 29;10:e70472. doi: 10.7554/eLife.70472 (PMC8758141; doi:10.7554/eLife.70472)
Supplement: Figure 4—figure supplement 6—source data 1. [file elife-70472-fig4-figsupp6-data1.xlsx]

## Sheet: Figure 4 Supplement 6
Source Data - Figure 4 Supplement
qPCR
figure	Gene	HepG2	mean	SEM	p value	n					miR-20b	U6
					(t-test)					NT	21.6918	24.3068
4 Supplement 6	miR-20b	miR-NC	1	0.0523371		3					21.9247	24.629
		miR-NC + OA	1.58079	0.114543	0.00497075	3					21.9953	24.4385
		miR-20b	5.93305	0.383692	0.000109388	3				OA 12h	20.7285	24.1442
		miR-20b + OA	4.74197	0.397764	0.000367757	3					20.6467	23.9136
		miR-20b	3.81793	0.555116	0.00360573	3					20.8091	23.8599
		miR-20b + OA	3.8142	0.61485	0.00516724	3				OA 24h	19.8378	24.9352
											19.1937	24.5265
											19.4112	24.4442
										OA 36h	19.5361	24.5246
											19.6548	24.5673
											19.6455	24.2232
										OA 48h	20.4858	24.5968
											20.255	24.7715
											20.135	24.9864
										OA 72h	20.3248	25.1132
											20.9479	24.9173
											20.6432	25.3253
