# Supplementary material for: Hepatic MIR20B promotes nonalcoholic fatty liver disease by suppressing PPARA
Source: eLife. 2021 Dec 29;10:e70472. doi: 10.7554/eLife.70472 (PMC8758141; doi:10.7554/eLife.70472)
Supplement: Figure 4—source data 1. [file elife-70472-fig4-data1.xlsx]

## Sheet: Figure 4A
Source Data - Figure 4
qPCR					vs. miR-NC	vs. miR-NC + OA	vs. miR-20b
figure	Gene	HepG2	mean	SEM	p value	p value	p value	n			miR-20b	U6
					(t-test)	(t-test)	(t-test)			miR-NC	26.2769	27.9503
4A	miR-20b	miR-NC	1	0.0642087				3			25.8209	27.7939
		miR-NC + OA	4.36667	0.447625	0.000869277			3			25.9691	27.7116
		miR-20b	4.24739	0.553031	0.00215261			3		miR-NC + OA	24.0015	27.6671
		miR-20b + OA	6.17297	0.57755	0.000440055	0.0343996	0.00368534	3			23.6654	27.5646
											23.8247	28.0004
										miR-20b	23.919	28.1215
											24.4599	28.2889
											24.5344	28.0966
										miR-20b + OA	23.4947	28.1613
											24.12	28.4815
											23.7684	27.9876

## Sheet: Figure 4B
Source Data - Figure 4
qPCR					vs. miR-NC	vs. miR-NC + OA
figure	Gene	HepG2	mean	SEM	p value	p value	n
					(t-test)	(t-test)						PPARA	CPT1A	ACOX1	SREBF1	FASN	CD36	FABP1	TBP
4B	PPARA	miR-NC	1	0.246045			3				miR-NC	21.0268	19.8885	18.034	23.5151	23.2086	25.6312	21.9323	19.9953
		miR-NC + OA	0.316366	0.0626484	0.027256		3					20.9081	19.8614	18.0015	24.3098	24.2028	26.4076	22.3888	20.906
		miR-20b	0.415857	0.0909585	0.044963		3					21.059	19.8915	18.0626	24.6391	24.4611	26.3044	22.2085	21.386
		miR-20b + OA	0.156082	0.012096	0.013319	0.0329553	3				miR-NC OA	22.1251	20.3405	19.6019	22.9989	22.2656	26.8971	22.1866	20.808
												21.9718	22.0546	19.3568	22.4522	22.19	26.8781	22.9183	19.9895
					vs. miR-NC	vs. miR-NC + OA						22.0924	21.789	19.6345	22.5859	22.2138	27.2238	22.5618	19.8619
figure	Gene	HepG2	mean	SEM	p value	p value	n				miR-20b-5p	22.6485	21.9556	19.8327	24.42	24.8544	27.3684	23.0862	21.7653
					(t-test)	(t-test)						21.5496	20.2207	18.4156	23.577	23.0597	27.4738	23.9354	19.6434
4B	CPT1A	miR-NC	1	0.253808			3					21.5273	20.7216	18.5298	23.8077	23.0247	27.3473	23.9608	19.9338
		miR-NC + OA	0.316373	0.19002	0.0486539		3				miR-20b-5p OA	21.5222	22.0391	20.0278	21.5322	20.9007	28.5361	24.4056	18.5641
		miR-20b	0.356851	0.0442726	0.0335154		3					21.8913	20.4374	19.2573	21.4895	21.3273	28.8377	24.8691	19.0004
		miR-20b + OA	0.151927	0.0544643	0.0154379	0.226118	3					21.8857	20.4474	19.0996	21.9283	21.3882	26.7465	22.7584	19.2817
					vs. miR-NC	vs. miR-NC + OA
figure	Gene	HepG2	mean	SEM	p value	p value	n
					(t-test)	(t-test)
4B	ACOX1	miR-NC	1	0.24888			3
		miR-NC + OA	0.235053	0.0468428	0.0195716		3
		miR-20b	0.411641	0.0630718	0.0418555		3
		miR-20b + OA	0.109106	0.0315246	0.0118861	0.0447742	3
					vs. miR-NC	vs. miR-NC + OA
figure	Gene	HepG2	mean	SEM	p value	p value	n
					(t-test)	(t-test)
4B	SREBF1	miR-NC	1	0.0537837			3
		miR-NC + OA	1.92557	0.204935	0.00599125		3
		miR-20b	1.02056	0.321071	0.476342		3
		miR-20b + OA	1.6249	0.15394	0.00929154	0.152929	3
					vs. miR-NC	vs. miR-NC + OA
figure	Gene	HepG2	mean	SEM	p value	p value	n
					(t-test)	(t-test)
4B	FASN	miR-NC	1	0.0451861			3
		miR-NC + OA	2.36885	0.482807	0.0238447		3
		miR-20b	1.00094	0.07242	0.495867		3
		miR-20b + OA	1.91783	0.102342	0.000601368	0.206246	3
					vs. miR-NC	vs. miR-NC + OA
figure	Gene	HepG2	mean	SEM	p value	p value	n
					(t-test)	(t-test)
4B	CD36	miR-NC	1	0.160747			3
		miR-NC + OA	0.388143	0.102408	0.016291		3
		miR-20b	0.409727	0.20593	0.0433641		3
		miR-20b + OA	0.102987	0.0613595	0.00322831	0.0376426	3
					vs. miR-NC	vs. miR-NC + OA
figure	Gene	HepG2	mean	SEM	p value	p value	n
					(t-test)	(t-test)
4B	FABP1	miR-NC	1	0.227379			3
		miR-NC + OA	0.565531	0.204973	0.114419		3
		miR-20b	0.432841	0.290607	0.0995463		3
		miR-20b + OA	0.105018	0.0612585	0.00954713	0.0488469	3

## Sheet: Figure 4C
Source Data - Figure 4
qPCR					vs. miR-NC	vs. miR-NC + OA
figure	Gene	HepG2	mean	SEM	p value	p value	n			GPAT1	GPAT2	AGPAT1	AGPAT2	DGAT1	DGAT2	TBP
					(t-test)	(t-test)				21.7187	22.098	20.5404	15.8759	14.9928	15.0474	19.9953
4C	GPAT1	miR-NC	1	0.241694			3			22.0298	22.9082	21.4669	16.3548	15.4017	15.4997	20.906
		miR-NC + OA	2.38997	0.334518	0.0140477		3			21.8804	22.2384	21.3408	15.8271	15.9597	15.9265	21.386
		miR-20b	1.43899	0.258766	0.141407		3			20.2285	21.0138	20.304	15.2938	14.211	15.1741	20.808
		miR-20b + OA	2.50931	0.352846	0.0121261	0.409092	3			19.8973	20.5972	19.0748	14.2894	13.81	13.6197	19.9895
										19.9259	20.8479	20.0774	14.7678	13.8313	13.9682	19.8619
					vs. miR-NC	vs. miR-NC + OA				22.2403	22.4066	21.5137	16.3742	15.9328	15.3929	21.7653
figure	Gene	HepG2	mean	SEM	p value	p value	n			20.7037	21.2892	19.8887	14.4178	14.0269	14.4474	19.6434
					(t-test)	(t-test)				20.0563	20.8484	19.921	14.6975	14.4299	14.7349	19.9338
4C	GPAT2	miR-NC	1	0.302033			3			18.5027	19.0275	18.7869	13.404	12.0469	12.3933	18.5641
		miR-NC + OA	1.95707	0.304005	0.0446387		3			18.3436	18.9191	18.8099	13.7721	12.2411	12.4449	19.0004
		miR-20b	1.43895	0.273059	0.170842		3			19.1808	20.0073	18.5099	13.9384	12.511	12.8792	19.2817
		miR-20b + OA	2.30434	0.392375	0.0289658	0.261357	3
					vs. miR-NC	vs. miR-NC + OA
figure	Gene	HepG2	mean	SEM	p value	p value	n
					(t-test)	(t-test)
4C	AGPAT1	miR-NC	1	0.146273			3
		miR-NC + OA	1.73884	0.370759	0.0686973		3
		miR-20b	1.27056	0.125478	0.116508		3
		miR-20b + OA	1.54716	0.313155	0.0942861	0.356516	3
					vs. miR-NC	vs. miR-NC + OA
figure	Gene	HepG2	mean	SEM	p value	p value	n
					(t-test)	(t-test)
4C	AGPAT2	miR-NC	1	0.309652			3
		miR-NC + OA	1.49885	0.178079	0.117531		3
		miR-20b	1.33091	0.0501911	0.175493		3
		miR-20b + OA	1.29414	0.0483299	0.200549	0.164731	3
					vs. miR-NC	vs. miR-NC + OA
figure	Gene	HepG2	mean	SEM	p value	p value	n
					(t-test)	(t-test)
4C	DGAT1	miR-NC	1	0.102227			3
		miR-NC + OA	1.94823	0.237028	0.0106634		3
		miR-20b	1.25718	0.0852804	0.0627774		3
		miR-20b + OA	2.56651	0.142697	0.000435855	0.0445703	3
					vs. miR-NC	vs. miR-NC + OA
figure	Gene	HepG2	mean	SEM	p value	p value	n
					(t-test)	(t-test)
4C	DGAT2	miR-NC	1	0.105889			3
		miR-NC + OA	1.63554	0.250641	0.039874		3
		miR-20b	1.3322	0.393571	0.230385		3
		miR-20b + OA	2.13772	0.163152	0.00213043	0.0842088	3

## Sheet: Figure 4E
Source Data - Figure 4
qPCR					vs. miR-NC	vs. miR-NC + OA					PPARGC1A	SIRT1	TBP
figure	Gene	HepG2	mean	SEM	p value	p value	n				22.4211	26.3627	19.9953
					(t-test)	(t-test)					22.7827	26.9555	20.906
4E	PPARGC1A	miR-NC	1	0.194422			3				22.8109	26.8284	21.386
		miR-NC + OA	0.364665	0.099364	0.021843		3				23.4925	27.1694	20.808
		miR-20b	0.532201	0.0977283	0.0490023		3				23.6341	28.1155	19.9895
		miR-20b + OA	0.123744	0.0370286	0.00572252	0.0427696	3				23.7515	28.4516	19.8619
											24.0804	29.1442	21.7653
					vs. miR-NC	vs. miR-NC + OA					22.779	26.8286	19.6434
figure	Gene	HepG2	mean	SEM	p value	p value	n				22.9058	27.2201	19.9338
					(t-test)	(t-test)					24.6921	29.1155	18.5641
4E	SIRT1	miR-NC	1	0.19404			3				23.6364	27.9468	19.0004
		miR-NC + OA	0.365242	0.181546	0.0376344		3				23.6537	27.9676	19.2817
		miR-20b	0.384109	0.0149045	0.0170148		3
		miR-20b + OA	0.10201	0.0318575	0.00514315	0.113222	3

## Sheet: Figure 4F
Source Data - Figure 4
qPCR					vs. miR-NC	vs. miR-NC + OA
figure	Gene	HepG2	mean	SEM	p value	p value	n					VIPR1	MT-ATP6	globulin
					(t-test)	(t-test)						10.9382	11.7273	17.2536
4F	VIPR1	miR-NC	1	0.0620685			3					10.9077	11.3137	16.7983
		miR-NC + OA	0.714708	0.0215449	0.00611564		3					10.9377	11.3391	17.2
		miR-20b	0.767225	0.0355842	0.0156356		3					10.8805	10.9829	17.4412
		miR-20b + OA	0.468941	0.0134084	0.000558921	0.000318058	3					10.885	11.3942	17.3564
												10.8979	10.9541	17.0696
					vs. miR-NC	vs. miR-NC + OA						11.9965	14.2114	17.9397
figure	Gene	HepG2	mean	SEM	p value	p value	n					12.0002	14.2362	17.5728
					(t-test)	(t-test)						11.9879	14.3095	18.1251
4F	MT-ATP6	miR-NC	1	0.0341538			3					12.1616	13.839	17.7929
		miR-NC + OA	0.218878	0.015388	0.00197255		3					12.178	14.1159	18.0156
		miR-20b	0.857174	0.0561271	0.184886		3					12.0351	14.0652	17.7045
		miR-20b + OA	0.167608	0.00553503	0.00152631	0.0175054	3					11.2566	11.3591	17.0941
												11.42	11.2214	17.2396
												11.2366	11.7117	17.2452
												11.1571	11.4217	17.2085
												11.0086	11.3455	16.8494
												11.4849	11.7011	17.3218
												12.9728	14.9812	18.0602
												12.9482	14.8224	18.2864
												13.03	14.8382	18.1403
												12.9892	14.7171	18.0988
												13.0521	14.7383	18.3255
												12.857	14.7983	18.0821

## Sheet: Figure 4J
Source Data - Figure 4
	CPMA 1	CPMA 2	CPMA 3
miR-NC	22.1628	22.3674	21.5695
miR-NC	30.2957	29.5569	30.2443
miR-20b	22.0138	21.3715	22.3836
miR-20b	22.5225	23.0982	23.647
miR-NC + OA	21.7109	22.1548	23.4282
miR-NC + OA	20.0987	19.8093	18.0438
miR-20b + OA	19.6439	20.259	21.1675
miR-20b + OA	17.1832	18.3721	17.2244

## Sheet: Figure 4K
Source Data - Figure 4
		CPMA 1	CPMA 2	CPMA 3
	miR-NC	3493.3	3513.13	3545.43
	miR-20b	1947.01	1955.51	1972.28
	miR-NC + OA	2024.15	2024.16	2032.39
	miR-20b + OA	1366.92	1372.51	1374.65

## Sheet: Figure 4L
Source Data - Figure 4
qPCR					vs. miR-NC	vs. miR-NC + OA	vs. anti-miR-20b
figure	Gene	HepG2	mean	SEM	p value	p value	p value	n			miR-20b	U6
					(t-test)	(t-test)	(t-test)			miR-NC	25.6924	27.2501
4L	miR-20b	miR-NC	1	0.162786				3			26.1359	26.9424
		miR-NC + OA	4.76854	0.739672	0.00381			3			25.643	27.2623
		anti-miR-20b	0.617233	0.0536753	0.0446519			3		miR-NC + OA	24.8898	27.9837
		anti-miR-20b + OA	2.18875	0.373437	0.0216634	0.0178761	0.00704151	3			24.2855	28.0796
											23.767	27.6367
										anti-miR-20b	27.1759	28.0272
											27.476	28.2031
											26.9008	27.3159
										anti-miR-20b + OA	26.3026	28.4046
											25.7535	28.1242
											24.9778	27.8906

## Sheet: Figure 4M
Source Data - Figure 4
qPCR					vs. miR-NC	vs. miR-NC + OA					PPARa	CPT1a	Acox1	SREBP-1c	FASN	FATP1	CD36	L-FABP	TBP
figure	Gene	HepG2	mean	SEM	p value	p value	n			miR-NC	20.7481	19.8697	17.4751	23.465	23.2008	22.4802	24.0337	22.1305	19.8592
					(t-test)	(t-test)					21.3054	19.9073	17.293	23.5652	23.2163	24.8056	24.452	22.1321	20.1314
4M	PPARA	miR-NC	1	0.246045			3				20.8871	19.9618	18.0307	24.3004	24.2089	22.2456	25.2989	22.4207	20.3679
		miR-NC + OA	0.297193	0.072212	0.025931		3				20.9292	19.761	17.9723	24.3191	24.1966	23.6736	26.1101	22.7487	21.444
		anti-miR-20b	1.55411	0.0645931	0.0474656		3				21.1962	19.8864	18.7536	24.5677	24.5172	21.8003	24.823	22.6746	21.2961
		anti-miR-20b + OA	0.710048	0.0344149	0.154001	0.00334647	3				20.9218	19.8966	17.8715	24.7105	24.405	22.7309	25.0268	23.6648	21.476
										miR-NC OA	22.1442	20.6731	18.4444	22.2977	22.372	21.9788	26.5474	23.6863	21.6313
					vs. miR-NC	vs. miR-NC + OA					22.106	20.7078	18.7594	22.7	22.1593	22.4404	25.8081	23.5178	19.9847
figure	Gene	HepG2	mean	SEM	p value	p value	n				22.3083	21.5733	19.3764	22.1874	22.1895	23.3178	25.6208	22.8712	19.9775
					(t-test)	(t-test)					21.9353	21.7358	19.3372	23.217	22.1904	24.1808	26.9304	22.8248	20.0015
4M	CPT1A	miR-NC	1	0.253808			3				22.3597	21.653	19.735	22.7681	22.2323	22.7631	24.5165	21.9947	20.0052
		miR-NC + OA	0.279189	0.133795	0.0329481		3				22.2251	21.925	19.5341	23.1038	22.1952	22.778	25.0093	21.8756	19.7186
		anti-miR-20b	2.97129	0.697639	0.0283312		3			miR-20b-5p Inh	20.2103	19.0383	17.5195	23.8614	22.8259	22.2178	22.8847	21.3501	20.608
		anti-miR-20b + OA	2.20626	0.599211	0.0687039	0.0174454	3				20.1497	19.2517	17.2541	24.0554	22.8478	23.5793	24.189	22.2087	20.9809
											20.4143	17.8597	17.9645	24.3315	23.5026	21.9052	23.5851	22.5602	20.9156
					vs. miR-NC	vs. miR-NC + OA					20.4644	18.3358	17.8606	24.5264	23.5271	23.5988	24.5993	22.5114	20.9369
figure	Gene	HepG2	mean	SEM	p value	p value	n				20.2942	18.0632	17.4556	24.46	23.561	21.7945	24.5836	21.8013	20.7373
					(t-test)	(t-test)					20.5457	17.7992	17.1124	23.7296	23.6144	22.9956	24.0813	21.4093	20.9234
4M	ACOX1	miR-NC	1	0.0913341			3			miR-20b-5p Inh OA	21.8844	18.5065	18.4244	23.3241	22.9464	22.3839	24.6048	22.9116	21.2955
		miR-NC + OA	0.333189	0.148542	0.00935691		3				22.0481	18.7506	19.0592	23.5294	22.8123	23.7268	24.5719	22.6051	21.4699
		anti-miR-20b	1.37954	0.145739	0.0459806		3				21.4215	18.9728	18.2688	23.2997	22.3352	21.4397	24.5842	21.8936	20.8234
		anti-miR-20b + OA	0.724023	0.107176	0.0607864	0.0498948	3				21.4632	19.3	18.4058	23.482	22.4463	23.4214	24.5776	23.2147	20.9989
											21.7686	19.3874	18.8523	23.138	23.4016	21.9803	24.5371	22.3265	20.8145
					vs. miR-NC	vs. miR-NC + OA					21.5657	19.268	19.1356	23.4261	23.5434	23.6932	23.9308	22.6293	20.9862
figure	Gene	HepG2	mean	SEM	p value	p value	n
					(t-test)	(t-test)
4M	SREBF1	miR-NC	1	0.0537837			3
		miR-NC + OA	2.02766	0.61606	0.0859451		3
		anti-miR-20b	1.06041	0.0720483	0.269234		3
		anti-miR-20b + OA	2.14147	0.202177	0.0027421	0.434594	3
					vs. miR-NC	vs. miR-NC + OA
figure	Gene	HepG2	mean	SEM	p value	p value	n
					(t-test)	(t-test)
4M	FASN	miR-NC	1	0.0451861			3
		miR-NC + OA	2.36885	0.482807	0.0238447		3
		anti-miR-20b	1.69666	0.265509	0.030449		3
		anti-miR-20b + OA	2.68441	0.573859	0.0214889	0.347773	3
					vs. miR-NC	vs. miR-NC + OA
figure	Gene	HepG2	mean	SEM	p value	p value	n
					(t-test)	(t-test)
4M	CD36	miR-NC	1	0.253034			3
		miR-NC + OA	0.403564	0.10261	0.0471416		3
		anti-miR-20b	1.99934	0.306389	0.0328564		3
		anti-miR-20b + OA	1.63884	0.151446	0.0481008	0.0012539	3
					vs. miR-NC	vs. miR-NC + OA
figure	Gene	HepG2	mean	SEM	p value	p value	n
					(t-test)	(t-test)
4M	FABP1	miR-NC	1	0.091892			3
		miR-NC + OA	0.625884	0.11651	0.0326363		3
		anti-miR-20b	1.70706	0.274228	0.0354222		3
		anti-miR-20b + OA	1.25331	0.0712686	0.0474624	0.00503861	3

## Sheet: Figure 4N
Source Data - Figure 4
qPCR					vs. miR-NC	vs. miR-NC + OA
figure	Gene	HepG2	mean	SEM	p value	p value	n				GPAT1	GPAT2	AGPAT1	AGPAT2	DGAT1	DGAT2	TBP
					(t-test)	(t-test)				miR-NC	21.7187	22.098	20.5404	15.8759	14.9928	15.0474	19.9953
4N	GPAT1	miR-NC	1	0.241694			3				22.0298	22.9082	21.4669	16.3548	15.4017	15.4997	20.906
		miR-NC + OA	2.38997	0.334518	0.0140477		3				21.8804	22.2384	21.3408	15.8271	15.9597	15.9265	21.386
		anti-miR-20b	0.850582	0.0822709	0.294906		3			miR-NC OA	20.2285	21.0138	20.304	15.2938	14.211	15.1741	20.808
		anti-miR-20b + OA	0.678753	0.20012	0.181909	0.00589183	3				19.8973	20.5972	19.0748	14.2894	13.81	13.6197	19.9895
											19.9259	20.8479	20.0774	14.7678	13.8313	13.9682	19.8619
					vs. miR-NC	vs. miR-NC + OA				anti-miR-20b	22.3517	21.9032	21.9036	17.062	16.6548	16.8559	20.7944
figure	Gene	HepG2	mean	SEM	p value	p value	n				22.123	21.7957	22.2347	17.1799	16.6805	17.359	20.9262
					(t-test)	(t-test)					21.9024	24.2314	21.3749	16.1831	17.0194	17.3046	20.8304
4N	GPAT2	miR-NC	1	0.302033			3			anti-miR-20b OA	22.3176	24.2777	21.4562	16.2462	16.0883	16.2236	21.3827
		miR-NC + OA	1.95707	0.304005	0.0446387		3				22.7468	22.0533	21.3695	16.9423	15.5441	16.8996	20.9111
		anti-miR-20b	1.06696	0.402573	0.450294		3				23.2547	22.0105	21.8434	16.8992	16.0897	15.8284	20.9004
		anti-miR-20b + OA	1.01398	0.312511	0.487936	0.0482751	3
					vs. miR-NC	vs. miR-NC + OA
figure	Gene	HepG2	mean	SEM	p value	p value	n
					(t-test)	(t-test)
4N	AGPAT1	miR-NC	1	0.146273			3
		miR-NC + OA	1.73884	0.370759	0.0686973		3
		anti-miR-20b	0.648404	0.107392	0.0623634		3
		anti-miR-20b + OA	0.917837	0.155582	0.360001	0.0553526	3
					vs. miR-NC	vs. miR-NC + OA
figure	Gene	HepG2	mean	SEM	p value	p value	n
					(t-test)	(t-test)
4N	AGPAT2	miR-NC	1	0.309652			3
		miR-NC + OA	1.49885	0.178079	0.117531		3
		anti-miR-20b	0.588541	0.133061	0.144595		3
		anti-miR-20b + OA	0.75992	0.219886	0.280809	0.0296632	3
					vs. miR-NC	vs. miR-NC + OA
figure	Gene	HepG2	mean	SEM	p value	p value	n
					(t-test)	(t-test)
4N	DGAT1	miR-NC	1	0.102227			3
		miR-NC + OA	1.94823	0.237028	0.0106634		3
		anti-miR-20b	0.420378	0.0366964	0.00296955		3
		anti-miR-20b + OA	0.901478	0.10227	0.26653	0.00770708	3
					vs. miR-NC	vs. miR-NC + OA
figure	Gene	HepG2	mean	SEM	p value	p value	n
					(t-test)	(t-test)
4N	DGAT2	miR-NC	1	0.105889			3
		miR-NC + OA	1.63554	0.250641	0.039874		3
		anti-miR-20b	0.330024	0.0312026	0.00186138		3
		anti-miR-20b + OA	0.729019	0.158976	0.114497	0.0189355	3

[truncated: 4 more sheets: Figure 4P, Figure 4Q, Figure 4U, Figure 4V]
