# Supplementary material for: Hepatic MIR20B promotes nonalcoholic fatty liver disease by suppressing PPARA
Source: eLife. 2021 Dec 29;10:e70472. doi: 10.7554/eLife.70472 (PMC8758141; doi:10.7554/eLife.70472)
Supplement: Figure 5—figure supplement 1—source data 1. [file elife-70472-fig5-figsupp1-data1.xlsx]

## Sheet: Figure 5 Supplement 1A
Source Data - Figure 5 Supplement
qPCR					vs. AAV-Control NCD	vs. AAV-Control HFD					miR-20b	U6
figure	Gene		mean	SEM	p value	p value	n			AAV-Control NCD	27.218	23.9311
					(t-test)	(t-test)					26.9391	24.0767
5 Supplement A	miR-20b	AAV-Control NCD	1	0.141851			10				26.8176	23.0077
		AAV-miR-20b NCD	1.03437	0.155171	0.435983		10				26.7531	23.9549
		AAV-Control HFD	1.32178	0.246424	0.136308		10				26.9923	24.0947
		AAV-miR-20b HFD	1.47637	0.131921	0.0121405	0.293517	10				26.5607	23.5089
											27.0509	24.3063
											25.7278	23.8725
											27.3924	23.7423
											27.4293	23.9103
										AAV-miR-20b NCD	27.643	24.5996
											27.0194	23.6168
											26.9906	24.1757
											27.1237	23.7232
											26.2776	24.5223
											26.9187	24.1501
											26.7111	23.237
											26.4846	23.9706
											27.1213	23.7136
											26.3869	22.9472
										AAV-Control HFD	27.0255	23.315
											26.9301	23.3541
											27.9146	24.0321
											26.6831	23.2303
											26.2522	23.9843
											25.8664	24.3833
											26.3942	23.3052
											26.4591	23.9636
											26.0882	24.2407
											25.5539	23.632
										AAV-miR-20b HFD	26.7315	24.4368
											25.8809	24.0077
											26.4491	24.3379
											26.5916	24.2669
											26.9323	23.9348
											25.8972	23.91
											26.0441	23.7231
											26.2268	23.6801
											26.4405	23.0627
											25.9204	23.3631

## Sheet: Figure 5 Supplement 1B
Source Data - Figure 5 Supplement
qPCR					vs. AAV-Control NCD	vs. AAV-Control HFD					miR-20b	U6
figure	Gene		mean	SEM	p value	p value	n			AAV-Control NCD	22.0675	20.9187
					(t-test)	(t-test)					22.3099	21.0006
5 Supplement B	miR-20b	AAV-Control NCD	1	0.0905726			10				21.1501	20.4967
		AAV-miR-20b NCD	1.02644	0.331662	0.469778		10				22.0697	20.7515
		AAV-Control HFD	1.10412	0.200303	0.320731		10				22.4527	21.3927
		AAV-miR-20b HFD	1.04909	0.227774	0.421754	0.429038	10				21.6379	20.7144
											22.3883	21.6372
											21.8793	20.5668
											21.9962	21.643
											21.9297	21.666
										AAV-miR-20b NCD	24.8346	25.9352
											23.8253	20.4288
											22.961	21.3955
											23.2992	21.0145
											22.5321	21.8242
											22.927	21.3052
											23.0377	21.7781
											22.7124	21.953
											23.194	22.2626
											22.9453	21.6378
										AAV-Control HFD	22.5092	20.9755
											21.2038	21.5053
											21.9493	21.8653
											23.0081	20.8071
											22.3037	20.9362
											22.3401	21.8959
											22.5404	20.8961
											23.0401	21.162
											21.4764	21.3709
											21.9448	21.4341
										AAV-miR-20b HFD	23.6509	22.1827
											23.0521	22.9545
											23.3816	21.819
											23.5542	21.7492
											22.6859	20.5818
											23.0782	20.7182
											21.6693	21.7575
											21.823	20.5091
											20.9579	21.3693
											21.6708	21.0222

## Sheet: Figure 5 Supplement 1C
Source Data - Figure 5 Supplement
qPCR					vs. AAV-Control NCD	vs. AAV-Control HFD					miR-20b	U6
figure	Gene		mean	SEM	p value	p value	n			AAV-Control NCD	20.9551	20.6931
					(t-test)	(t-test)					20.8001	21.4849
5 Supplement C	miR-20b	AAV-Control NCD	1	0.18795			10				20.3276	21.0112
		AAV-miR-20b NCD	0.941994	0.184245	0.414023		10				20.3199	20.934
		AAV-Control HFD	1.23577	0.334828	0.273437		10				19.6921	20.9517
		AAV-miR-20b HFD	1.31369	0.197954	0.132763	0.421744	10				20.4062	20.5667
											21.0928	20.7256
											18.541	20.4037
											20.9336	20.4719
											21.0096	20.9924
										AAV-miR-20b NCD	21.5754	20.9857
											19.7753	20.3677
											19.869	20.5458
											20.8541	20.4164
											20.1363	20.9912
											20.9209	20.235
											21.2166	21.2374
											20.057	21.8442
											21.0721	20.7268
											20.5147	21.6133
										AAV-Control HFD	21.9224	21.8042
											22.2247	21.0823
											22.0955	22.132
											22.2884	21.5699
											21.0494	21.9712
											21.1072	21.6449
											20.2973	22.8658
											20.4703	21.1649
											20.9196	21.8008
											20.4657	22.0786
										AAV-miR-20b HFD	21.2657	21.4153
											20.9425	21.566
											21.2185	22.3142
											21.2649	21.2204
											21.7338	22.1067
											20.744	21.451
											20.7961	22.3008
											21.1239	22.1726
											20.8698	22.9281
											20.7481	21.908
