# Supplementary material for: Hepatic MIR20B promotes nonalcoholic fatty liver disease by suppressing PPARA
Source: eLife. 2021 Dec 29;10:e70472. doi: 10.7554/eLife.70472 (PMC8758141; doi:10.7554/eLife.70472)
Supplement: Figure 5—figure supplement 2—source data 1. [file elife-70472-fig5-figsupp2-data1.xlsx]

## Sheet: Figure 5 Supplement 2
Source Data - Figure 5 Supplement
qPCR					vs. AAV-Control NCD	vs. AAV-Control HFD
figure	Gene		mean	SEM	p value	p value	n				Ppara	Rora	Rorc	Thrb	TBP
					(t-test)	(t-test)				AAV-Control NCD	24.012	24.9214	22.0963	24.5195	24.5946
5 Supplement 2	Ppara	AAV-Control NCD	1	0.21691			10				23.9095	25.5316	21.2193	24.3463	24.5551
		AAV-miR-20b NCD	0.466599	0.0500668	0.0138239		10				23.2781	25.1444	21.1617	24.9022	24.446
		AAV-Control HFD	0.489837	0.0589606	0.0178784		10				22.5242	25.3886	20.9248	24.7895	24.7332
		AAV-miR-20b HFD	0.283967	0.030888	0.00213582	0.00313779	10				24.1863	24.4638	20.6121	24.6625	25.5066
											24.2738	24.9587	20.7255	24.6091	24.5929
					vs. AAV-Control NCD	vs. AAV-Control HFD					23.264	26.5277	21.9895	24.4574	24.2915
figure	Gene		mean	SEM	p value	p value	n				23.1928	26.413	21.9383	24.3771	23.7898
					(t-test)	(t-test)					21.8023	25.9192	21.742	25.7317	24.6687
5 Supplement 2	Rora	AAV-Control NCD	1	0.263476			10				21.8144	25.881	21.711	25.6341	24.2154
		AAV-miR-20b NCD	0.508113	0.0707971	0.044081		10			AAV-miR-20b NCD	23.4496	26.9044	21.5079	25.8379	24.5829
		AAV-Control HFD	0.566792	0.0807934	0.0666862		10				23.2856	26.9201	21.5752	25.6256	24.3088
		AAV-miR-20b HFD	0.507439	0.0656384	0.0431893	0.287801	10				24.831	26.967	22.3007	25.5693	24.7732
											24.8619	26.5067	22.3305	24.5179	25.5641
					vs. AAV-Control NCD	vs. AAV-Control HFD					25.0105	26.7125	21.9727	26.6529	24.8995
figure	Gene		mean	SEM	p value	p value	n				25.0348	26.7722	22.1592	26.4257	24.7776
					(t-test)	(t-test)					23.8955	26.184	21.7946	26.4356	24.2165
5 Supplement 2	Rorc	AAV-Control NCD	1	0.230495			10				24.0691	25.5347	22.2306	26.8098	24.4319
		AAV-miR-20b NCD	0.633484	0.0470801	0.0683256		10				24.2664	25.9004	22.0202	26.4894	24.431
		AAV-Control HFD	0.684912	0.0669087	0.102869		10				24.207	25.7264	21.9721	25.6422	24.9498
		AAV-miR-20b HFD	0.531246	0.0606887	0.0324175	0.0530654	10			AAV-Control HFD	23.4767	24.8586	21.0212	23.9082	24.306
											24.119	24.8029	20.7095	23.5555	24.1943
					vs. AAV-Control NCD	vs. AAV-Control HFD					23.7773	26.5622	22.2155	25.2221	24.9818
figure	Gene		mean	SEM	p value	p value	n				23.8693	26.4227	22.2411	24.7807	24.8472
					(t-test)	(t-test)					24.1132	26.614	22.0733	25.1097	24.2616
5 Supplement 2	Thrb	AAV-Control NCD	1	0.139082			10				24.0429	26.4918	21.9422	25.7939	25.0953
		AAV-miR-20b NCD	0.587572	0.193662	0.0503908		10				24.3754	26.8022	22.3841	25.1406	25.0217
		AAV-Control HFD	0.982105	0.117973	0.46146		10				25.2337	26.4856	22.2309	25.1721	24.5927
		AAV-miR-20b HFD	0.799804	0.153953	0.173685	0.179854	10				24.5949	26.6003	21.7183	24.983	24.8177
											24.4853	26.3831	22.03	25.3671	24.3929
										AAV-miR-20b HFD	23.6532	27.1614	20.8824	27.4533	24.1654
											23.66	27.2363	20.8931	26.1937	24.0165
											25.1736	26.2051	22.5446	26.5222	24.7421
											25.2917	26.4469	22.8811	25.7126	25.0318
											25.236	26.3065	22.4315	24.5052	25.0566
											25.3173	26.5797	22.5419	24.6002	24.5846
											25.198	26.0495	22.5525	24.9892	24.6719
											25.2306	26.041	22.5889	24.5859	24.9315
											25.4975	25.9026	22.5694	25.3194	24.9368
											25.6672	26.442	22.7741	25.1304	24.6949
