# Supplementary material for: Hepatic MIR20B promotes nonalcoholic fatty liver disease by suppressing PPARA
Source: eLife. 2021 Dec 29;10:e70472. doi: 10.7554/eLife.70472 (PMC8758141; doi:10.7554/eLife.70472)
Supplement: Figure 5—figure supplement 3—source data 1. [file elife-70472-fig5-figsupp3-data1.xlsx]

## Sheet: Figure 5 Supplement 3
Source Data - Figure 5 Supplement
	Epi	AAV-Control NCD	AAV-miR-20b NCD	AAV-Control HFD	AAV-miR-20b HFD		Ing	AAV-Control NCD	AAV-miR-20b NCD	AAV-Control HFD	AAV-miR-20b HFD		BAT	AAV-Control NCD	AAV-miR-20b NCD	AAV-Control HFD	AAV-miR-20b HFD
		0.673	0.455	1.566	2.318			0.461	0.326	0.683	2.037			0.131	0.127	0.173	0.285
		0.5	0.797	1.847	1.898			0.277	0.42	1.417	1.028			0.142	0.156	0.117	0.104
		0.333	0.665	2.56	1.747			0.313	0.379	1.783	1.218			0.108	0.166	0.195	0.101
		0.648	0.6	2.1	2.266			0.454	0.365	1.264	1.247			0.175	0.189	0.157	0.118
		0.72	0.518	2.122	1.995			0.454	0.386	1.784	1.922			0.195	0.171	0.222	0.159
		0.423	0.609	1.587	1.981			0.305	0.414	1.204	1.922			0.142	0.149	0.127	0.196
		0.555	0.393	2.247	2.111			0.415	0.125	1.741	0.957			0.184	0.198	0.164	0.118
		0.4	0.369	1.466	2.381			0.108	0.314	0.838	2.006			0.068	0.143	0.157	0.222
		0.413	0.314	1.693	2.312			0.313	0.232	0.562	0.878			0.122	0.12	0.101	0.088
		0.391	0.407	1.64	2.221			0.308	0.261	1.151	1.904			0.132	0.091	0.135	0.209
