# Supplementary material for: Hepatic MIR20B promotes nonalcoholic fatty liver disease by suppressing PPARA
Source: eLife. 2021 Dec 29;10:e70472. doi: 10.7554/eLife.70472 (PMC8758141; doi:10.7554/eLife.70472)
Supplement: Figure 5—figure supplement 4—source data 1. [file elife-70472-fig5-figsupp4-data1.xlsx]

## Sheet: Figure 5 Supplement 4A
Source Data - Figure 5 Supplement
qPCR					vs. AAV-Control NCD	vs. AAV-Control HFD
figure	Gene		mean	SEM	p value	p value	n				Atgl	Hsl	Mgl	TBP
					(t-test)	(t-test)				AAV-Control NCD	24.4161	23.2772	21.6649	25.4821
5 Supplement 4A	Atgl	AAV-Control NCD	1	0.147385			10				24.5903	23.6613	21.9089	25.407
		AAV-miR-20b NCD	0.741232	0.0906094	0.0760317		10				24.9354	23.764	22.0364	25.524
		AAV-Control HFD	0.737996	0.0910164	0.0738808		10				24.8128	24.3028	21.9634	25.5035
		AAV-miR-20b HFD	0.738164	0.060398	0.0587785	0.499394	10				24.1251	23.0773	21.9822	25.9587
											24.2815	22.7967	22.5338	25.9585
qPCR					vs. AAV-Control NCD	vs. AAV-Control HFD					24.4908	23.0651	22.152	25.485
figure	Gene		mean	SEM	p value	p value	n				24.9574	24.0654	22.1652	26.215
					(t-test)	(t-test)					23.6451	23.2716	22.4327	26.126
5 Supplement 4A	Hsl	AAV-Control NCD	1	0.125027			10				24.8773	23.7917	22.037	26.3728
		AAV-miR-20b NCD	0.961979	0.0384545	0.387316		10			AAV-miR-20b NCD	24.9333	23.9812	21.5482	26.4238
		AAV-Control HFD	0.825704	0.0973518	0.142925		10				24.8324	24.1479	22.538	26.5289
		AAV-miR-20b HFD	0.761794	0.0775364	0.0614012	0.306918	10				25.0507	24.033	21.8671	26.3753
											24.7981	23.5044	22.8606	25.7953
qPCR					vs. AAV-Control NCD	vs. AAV-Control HFD					25.1832	22.8802	22.1242	25.2187
figure	Gene		mean	SEM	p value	p value	n				25.4145	22.8514	22.7192	25.2898
					(t-test)	(t-test)					24.7757	23.273	22.3455	25.9744
5 Supplement 4A	Mgl	AAV-Control NCD	1	0.0754781			10				24.9248	23.5451	23.1351	25.6706
		AAV-miR-20b NCD	1.05215	0.183048	0.397622		10				25.3174	23.6988	21.9232	25.7559
		AAV-Control HFD	0.619782	0.0819314	0.00155004		10				25.2082	23.8096	21.8407	26.0848
		AAV-miR-20b HFD	0.740349	0.134645	0.054904	0.227106	10			AAV-Control HFD	25.7423	22.9611	23.2027	25.6911
											25.0903	24.6282	22.9019	25.8803
											24.3438	24.3089	23.1692	26.2402
											25.3506	23.9809	22.6242	26.607
											25.39	23.2507	23.7284	25.9713
											25.0913	23.9191	22.686	26.1657
											24.7039	24.1398	22.7607	25.2704
											24.9811	23.7238	23.0163	25.5391
											24.4734	23.9065	22.223	25.7306
											25.162	23.9733	23.2302	26.0259
										AAV-miR-20b HFD	24.9288	24.1917	22.5337	26.0906
											24.7618	23.6225	22.8511	25.4781
											25.1087	24.0195	22.826	25.4465
											25.3657	23.9642	23.1472	25.6745
											24.5515	23.51	23.655	25.5635
											24.7846	24.1459	22.4267	25.5959
											24.6602	23.534	21.7848	26.1725
											25.0497	24.1253	22.1262	26.3586
											24.7921	23.1769	22.9512	25.8042
											24.4023	23.8447	22.1324	25.455

## Sheet: Figure 5 Supplement 4B
Source Data - Figure 5 Supplement
					vs. AAV-Control NCD	vs. AAV-Control HFD
figure			mean	SEM	p value	p value	n
					(t-test)	(t-test)
5 Supplement 4B	Serum FFA	AAV-Control NCD	0.787527	0.036713			10
		AAV-miR-20b NCD	0.808705	0.0541872	0.374996		10
		AAV-Control HFD	1.1366	0.0320641	5.71368e-07		10
		AAV-miR-20b HFD	1.16154	0.0584538	1.89432e-05	0.356365	10
		AAV-Control NCD	AAV-miR-20b NCD	AAV-Control HFD	AAV-miR-20b HFD
		0.915553	0.871287	1.35406	1.0763
		0.61262	0.365953	1.02115	0.771073
		0.763393	1.00857	1.21315	1.32569
		0.7355	0.944673	1.16115	0.919607
		0.717207	0.802593	1.21401	1.29651
		0.670487	0.793527	1.05769	1.2875
		0.80734	0.7707	1.07427	1.26313
		0.770487	0.83598	1.11305	1.26243
		0.988193	0.862913	1.11107	1.24942
		0.894487	0.83086	1.04638	1.16371
