# Supplementary material for: Hepatic MIR20B promotes nonalcoholic fatty liver disease by suppressing PPARA
Source: eLife. 2021 Dec 29;10:e70472. doi: 10.7554/eLife.70472 (PMC8758141; doi:10.7554/eLife.70472)
Supplement: Figure 5—source data 1. [file elife-70472-fig5-data1.xlsx]

## Sheet: Figure 5A
Source Data - Figure 5
qPCR					vs. AAV-Control NCD	vs. AAV-Control HFD	vs. AAV-miR-20b NCD				miR-20b	U6
figure	Gene		mean	SEM	p value	p value	p value	n		AAV-Control NCD	23.3068	25.9857
					(t-test)	(t-test)	(t-test)				23.629	25.9779
5A	miR-20b	AAV-Control NCD	1	0.145463				10			23.4385	26.2675
		AAV-miR-20b NCD	9.97637	0.623611	1.99022e-11			10			23.6442	26.0327
		AAV-Control HFD	3.28534	0.395342	1.86745e-05			10			23.9136	25.5716
		AAV-miR-20b HFD	17.4058	1.17234	2.32303e-11	5.63149e-10	1.30526e-05	10			23.8599	26.1306
											24.9352	25.3054
											24.5265	25.7714
											24.4442	25.8357
											24.5246	26.1253
										AAV-miR-20b NCD	20.5467	25.9842
											21.2091	25.7273
											20.4563	25.9886
											20.8234	26.0031
											21.0441	26.3376
											21.1899	26.3892
											20.9854	26.5622
											20.8118	26.5318
											21.0142	26.4414
											20.9812	26.3813
										AAV-Control HFD	22.5673	25.9491
											22.2232	25.6885
											22.5968	26.3789
											22.7715	25.7031
											22.9864	25.585
											22.1132	26.4993
											21.6918	25.7428
											21.9247	25.6326
											21.9953	26.4376
											22.1285	25.9311
										AAV-miR-20b HFD	20.8085	26.7713
											21.0012	26.6795
											20.0963	25.9214
											20.2193	26.5316
											20.1617	26.1444
											19.9248	26.3886
											20.6121	26.4638
											19.7255	25.9587
											19.9895	26.5277
											19.9383	26.413

## Sheet: Figure 5B
Source Data - Figure 5
		AAV-Control NCD	AAV-miR-20b NCD	AAV-Control HFD	AAV-miR-20b HFD
		0.074256	0.0359469	0.0439181	0.0213376
		0.0888736	0.0423989	0.0559177	0.0259442
		0.0829231	0.0483771	0.0676568	0.0327373
	Average	0.0820176	0.042241	0.0558308	0.026673
	SEM	0.00424398	0.00358916	0.00685291	0.00331093
	T.TEST		0.00100884	0.0157069	0.000252304
				vs AAV-miR-20b NCD	0.0166374
				vs AAV-Control HFD	0.0093003

## Sheet: Figure 5DEF
Source Data - Figure 5					Fat/B.W	Lean/B.W		Liver (g)
				NCD Control 1	0.0887372	0.912628		1.31
				NCD Control 2	0.0628483	0.922601		1.419
				NCD Control 3	0.075	0.931875		1.277
				NCD Control 4	0.123746	0.859532		1.115
				NCD Control 5	0.09375	0.889583		1.21
				NCD Control 6	0.0743902	0.909756		1.359
				NCD Control 7	0.101695	0.912881		1.133
				NCD Control 8	0.0762376	0.923432		1.111
				NCD Control 9	0.0931408	0.895307		1.329
				NCD Control 10	0.093787	0.914201		1.172
				NCD miR20b 1	0.0804598	0.909483		1.039
				NCD miR20b 2	0.127329	0.864286		1.522
				NCD miR20b 3	0.085755	0.916524		1.374
				NCD miR20b 4	0.115556	0.877143		1.36
				NCD miR20b 5	0.0986755	0.900993		1.147
				NCD miR20b 6	0.0934579	0.906854		1.29
				NCD miR20b 7	0.0961538	0.89359		1.334
				NCD miR20b 8	0.0869718	0.905634		1.071
				NCD miR20b 9	0.0776358	0.896166		1.235
				NCD miR20b 10	0.0953947	0.899671		1.175
				HFD Control 1	0.346234	0.64961		1.478
				HFD Control 2	0.353927	0.645288		1.942
				HFD Control 3	0.366518	0.632143		2.265
				HFD Control 4	0.307254	0.688342		1.909
				HFD Control 5	0.341935	0.655991		2.272
				HFD Control 6	0.291919	0.708333		2.081
				HFD Control 7	0.266402	0.73254		1.438
				HFD Control 8	0.297949	0.698205		2.03
				HFD Control 9	0.249235	0.751276		1.577
				HFD Control 10	0.312981	0.685096		1.809
				HFD miR20b 1	0.393644	0.598729		2.435
				HFD miR20b 2	0.3798	0.618703		1.893
				HFD miR20b 3	0.39264	0.606345		2.364
				HFD miR20b 4	0.384826	0.611692		1.824
				HFD miR20b 5	0.376063	0.621924		2.154
				HFD miR20b 6	0.369953	0.628404		2.222
				HFD miR20b 7	0.321392	0.680155		2.31
				HFD miR20b 8	0.402455	0.593304		2.463
				HFD miR20b 9	0.374887	0.619231		2.512
				HFD miR20b 10	0.298485	0.701768		2.223

## Sheet: Figure 5H
steatosis
Mouse	#1	#2	#3	#4	#5	#6	#7	#8	#9	#10
AAV-Control NCD	0	0	0	0	0	0	0	0	1	0
AAV-miR-20b NCD	0	0	0	0	0	1	0	1	0	0
AAV-Control HFD	1	1	1	1	1	1	0	0	1	1
AAV-miR-20b HFD	2	2	2	1	1	1	2	2	1	1
imflammation
Mouse	#1	#2	#3	#4	#5	#6	#7	#8	#9	#10
AAV-Control NCD	0	0	0	1	0	0	1	1	1	0
AAV-miR-20b NCD	1	1	1	0	0	0	0	1	0	0
AAV-Control HFD	0	1	1	1	1	1	1	1	0	1
AAV-miR-20b HFD	1	0	0	1	1	2	2	2	0	1
ballooning
Mouse	#1	#2	#3	#4	#5	#6	#7	#8	#9	#10
AAV-Control NCD	0	0	0	0	0	0	0	0	0	0
AAV-miR-20b NCD	0	0	0	0	0	0	0	0	0	0
AAV-Control HFD	1	1	1	1	2	1	1	1	1	2
AAV-miR-20b HFD	2	2	2	1	1	2	2	2	2	1
NAS
Mouse	#1	#2	#3	#4	#5	#6	#7	#8	#9	#10
AAV-Control NCD	0	0	0	1	0	0	1	1	2	0
AAV-anti-miR-20b NCD	1	1	1	0	0	1	0	2	0	0
AAV-Control MCD	2	3	3	3	4	3	2	2	2	4
AAV-anti-miR-20b MCD	5	4	4	3	3	5	6	6	3	3

## Sheet: Figure 5I
Source Data - Figure 5
					vs. AAV-Control NCD	vs. AAV-Control HFD	vs. AAV-miR-20b NCD				AAV-Control NCD	AAV-miR-20b NCD	AAV-Control HFD	AAV-miR-20b HFD
figure	Gene		Average	SEM	p value	p value	p value	n			30.4107	37.5407	79.4907	94.6307
					(t-test)	(t-test)	(t-test)				24.1807	29.1407	89.6507	89.1107
5I	Triglyceride	AAV-Control NCD	28.7867	1.3089				10			23.6007	32.8307	94.5807	93.3907
		AAV-miR-20b NCD	31.5197	1.58029	0.0997574			10			29.5707	39.5007	88.4507	97.1507
		AAV-Control HFD	86.6017	2.05933	2.53569e-15			10			32.8307	25.2107	85.9907	97.0607
		AAV-miR-20b HFD	94.7857	1.26971	1.44189e-18	0.00165771	9.36657e-19	10			25.4907	28.0607	92.3007	87.4907
											35.2207	24.3507	92.6807	99.6507
											32.6707	32.9807	78.7707	98.3507
											29.4307	30.6807	75.6407	93.3307
											24.4607	34.9007	88.4607	97.6907

## Sheet: Figure 5J
Source Data - Figure 5
					vs. AAV-Control NCD	vs. AAV-Control HFD	vs. AAV-miR-20b NCD
figure			Average	SEM	p value	p value	p value	n			AAV-Control NCD	AAV-miR-20b NCD	AAV-Control HFD	AAV-miR-20b HFD
					(t-test)	(t-test)	(t-test)				40.5779	56.247	163.035	182.111
5J	Serum AST	AAV-Control NCD	62.2932	3.73994				10			64.4647	60.8881	181.174	138.978
		AAV-miR-20b NCD	71.2518	4.92818	0.0823963			10			45.0912	43.09	159.97	143.832
		AAV-Control HFD	190.337	10.3925	4.38881e-10			10			64.7628	60.9732	187.987	123.054
		AAV-miR-20b HFD	249.59	8.64379	5.31222e-14	0.000179164	1.19433e-13	10			58.0779	50.7968	176.107	114.155
											54.5012	43.3881	207.53	103.084
											63.0596	47.0499	184.665	141.32
											40.5353	44.1971	177.725	121.01
											83.5827	34.3613	201.612	99.8054
											38.4489	48.2847	212.981	109.599

## Sheet: Figure 5K
Source Data - Figure 5
					vs. AAV-Control NCD	vs. AAV-Control HFD	vs. AAV-miR-20b NCD
figure			Average	SEM	p value	p value	p value	n			AAV-Control NCD	AAV-miR-20b NCD	AAV-Control HFD	AAV-miR-20b HFD
					(t-test)	(t-test)	(t-test)				51.1375	61.0584	141.363	141.192
5K	Serum ALT	AAV-Control NCD	62.621	9.72985				10			74.5134	63.8686	166.271	142.427
		AAV-miR-20b NCD	65.0566	4.25806	0.410604			10			64.9757	54.6715	189.009	180.067
		AAV-Control HFD	180.825	10.97	1.09907e-07			10			70.7238	59.2275	152.646	117.901
		AAV-miR-20b HFD	237.14	13.3973	1.97586e-09	0.00221157	9.06288e-12	10			72.2567	63.2299	204.933	168.571
											43.3881	55.0973	224.818	124.97
											57.056	76.3869	164.015	142.895
											66.3808	52.5426	139.532	160.14
											54.7993	69.1058	202.762	105.979
											77.3236	58.4611	244.234	103.212

## Sheet: Figure 5N
Source Data - Figure 5
					vs. AAV-Control NCD	vs. AAV-Control HFD
figure			Average	SEM	p value	p value	n			Fasting Glucose
					(t-test)	(t-test)				88
5N	Fasting Glucose	AAV-Control NCD	93.4	3.66727			10			103
		AAV-miR-20b NCD	95.1	1.44222	0.36428		10			107
		AAV-Control HFD	112.333	6.8779	0.0114598		9			71
		AAV-miR-20b HFD	148.111	7.05227	9.02257e-07	0.00112135	9			106
										86
										103
										95
										84
										91
										92
										82
										86
										93
										90
										88
										103
										111
										110
										96
										106
										138
										149
										95
										104
										117
										92
										120
										90
										165
										185
										167
										132
										152
										137
										119
										130
										146

## Sheet: Figure 5O
Source Data - Figure 5
					vs. AAV-Control NCD	vs. AAV-Control HFD
figure			Average	SEM	p value	p value	n		AAV-Control NCD	AAV-miR-20b NCD	AAV-Control HFD	AAV-miR-20b HFD
					(t-test)	(t-test)			0.688633	0.628485	2.31198	2.74846
5O	Fasting Insulin	AAV-Control NCD	0.379659	0.050556			10		0.340289	0.65872	2.42791	2.87583
		AAV-miR-20b NCD	0.415683	0.043102	0.29715		10		0.647784	0.529739	1.95528	2.32389
		AAV-Control HFD	1.97463	0.104679	7.20486e-11		9		0.306517	0.307481	1.69571	2.27564
		AAV-miR-20b HFD	2.37388	0.141679	1.14511e-10	0.0235874	9		0.35412	0.331283	2.00449	1.89545
									0.257305	0.363126	1.55354	2.52138
									0.311663	0.349617	2.36506	2.20809
									0.378565	0.317774	1.61112	1.5886
									0.30523	0.361518	1.84656	2.92762
									0.206484	0.30909

## Sheet: Figure 5P
Source Data - Figure 5
					vs. AAV-Control NCD	vs. AAV-Control HFD				HOMA-IR
figure			Average	SEM	p value	p value	n			3.73698
					(t-test)	(t-test)				2.16141
5P	HOMA-IR	AAV-Control NCD	2.21312	0.327078			10			4.27429
		AAV-miR-20b NCD	2.39564	0.202979	0.320544		10			1.34203
		AAV-Control HFD	13.703	1.2071	1.3333e-08		9			2.31477
		AAV-miR-20b HFD	21.955	2.12474	1.23717e-08	0.0019215	9			1.36457
										1.97958
										2.21776
										1.58109
										1.15872
										3.5656
										3.33093
										2.80938
										1.76341
										1.83862
										1.97057
										2.22065
										2.17516
										2.4523
										1.82981
										15.1127
										20.6615
										17.9657
										9.93403
										12.8555
										11.2088
										13.4178
										11.9223
										10.2484
										27.9656
										32.8084
										23.9321
										18.5237
										17.7667
										21.3014
										16.2037
										12.7353
										26.3583

[truncated: 2 more sheets: Figure 5Q, Figure 5R]
