# Supplementary material for: Hepatic MIR20B promotes nonalcoholic fatty liver disease by suppressing PPARA
Source: eLife. 2021 Dec 29;10:e70472. doi: 10.7554/eLife.70472 (PMC8758141; doi:10.7554/eLife.70472)
Supplement: Figure 6—figure supplement 1—source data 1. [file elife-70472-fig6-figsupp1-data1.xlsx]

## Sheet: Figure 6 Supplement 1A
Source Data - Figure 6 Supplement
qPCR					vs. AAV-Control NCD	vs. AAV-Control HFD
figure	Gene		mean	SEM	p value	p value	n				miR-20b	U6
					(t-test)	(t-test)				AAV-Control NCD	23.9298	24.9211
6 Supplement A	miR-20b	AAV-Control NCD	1	0.19952			10				24.6061	24.2045
		AAV-anti-miR-20b NCD	0.878532	0.124234	0.305792		10				24.5123	24.3498
		AAV-Control HFD	1.11917	0.317136	0.377055		10				25.3464	24.4762
		AAV-anti-miR-20b HFD	1.09393	0.128407	0.348419	0.471013	10				25.2066	24.099
											24.942	24.0247
											24.9693	24.6954
											23.7319	24.78
											22.7727	23.9759
											22.8853	24.1627
										AAV-anti-miR-20b NCD	25.1285	24.8045
											25.2614	24.407
											24.3639	24.9295
											24.6623	24.228
											24.6053	24.4317
											24.6769	24.2814
											24.6195	24.5602
											24.649	24.9315
											23.9903	25.0613
											24.7744	25.5819
										AAV-Control HFD	23.9305	25.702
											23.8139	25.5832
											23.9584	25.441
											23.7137	24.1052
											23.8638	24.1769
											24.7751	23.8558
											24.6407	23.9761
											25.4975	23.9448
											25.4672	23.84
											25.3002	23.7035
										AAV-anti-miR-20b HFD	23.3308	24.4456
											23.8277	24.4619
											23.338	23.7804
											24.2307	23.9311
											23.4123	24.3722
											23.4002	24.2958
											23.3636	24.1331
											24.1878	23.9248
											23.8695	23.8556
											24.142	23.7836

## Sheet: Figure 6 Supplement 1B
Source Data - Figure 6 Supplement
qPCR					vs. AAV-Control NCD	vs. AAV-Control HFD					miR-20b	U6
figure	Gene		mean	SEM	p value	p value	n			AAV-Control NCD	23.2486	24.1413
					(t-test)	(t-test)					23.1602	24.3527
6 Supplement B	miR-20b	AAV-Control NCD	1	0.181067			10				23.3849	24.2876
		AAV-anti-miR-20b NCD	0.943066	0.202142	0.418091		10				23.0826	25.1887
		AAV-Control HFD	1.24562	0.283963	0.237593		10				23.6402	25.1112
		AAV-anti-miR-20b HFD	1.27169	0.139868	0.125235	0.467633	10				23.2401	24.9405
											23.2545	25.0866
											23.48	23.301
											23.1876	22.9366
											23.411	22.3966
										AAV-anti-miR-20b NCD	23.1734	23.6583
											22.8206	23.6868
											24.9274	23.3352
											24.71	23.363
											24.7351	24.2509
											23.1724	24.1341
											21.898	23.3815
											21.4231	23.2565
											21.7374	23.6911
											21.9277	23.9333
										AAV-Control HFD	23.3146	23.7687
											23.261	23.3995
											23.2057	23.3449
											22.9675	23.2671
											23.5623	23.2748
											23.3303	24.769
											22.848	24.7682
											22.899	25.2712
											22.7643	25.4683
											23.5195	25.4229
										AAV-anti-miR-20b HFD	21.4253	23.3317
											21.5074	23.3755
											21.413	23.2623
											21.6515	22.912
											21.5575	23.0997
											22.0639	23.0515
											22.1342	23.1593
											21.9602	22.8174
											21.9806	22.6617
											20.5538	22.6861

## Sheet: Figure 6 Supplement 1C
Source Data - Figure 6 Supplement
qPCR					vs. AAV-Control NCD	vs. AAV-Control HFD
figure	Gene		mean	SEM	p value	p value	n				miR-20b	U6
					(t-test)	(t-test)				AAV-Control NCD	24.6301	25.3149
6 Supplement C	miR-20b	AAV-Control NCD	1	0.132041			10				24.828	25.3279
		AAV-anti-miR-20b NCD	0.838617	0.0333215	0.125701		10				25.0837	24.6557
		AAV-Control HFD	1.04589	0.170078	0.416808		10				25.0273	24.5921
		AAV-anti-miR-20b HFD	1.2146	0.108118	0.112324	0.20675	10				24.8973	24.3546
											24.9516	24.2711
											25.7437	25.1607
											25.7693	25.153
											24.7978	24.2229
											24.8447	24.2761
										AAV-anti-miR-20b NCD	25.1081	24.7083
											24.7798	24.2433
											25.1998	24.9218
											24.8672	24.5041
											24.9333	24.2877
											24.834	24.4056
											24.9676	24.2395
											25.7294	25.406
											25.7099	25.2509
											25.8972	25.0333
										AAV-Control HFD	26.3565	25.0633
											26.3785	24.8064
											26.2108	24.9526
											24.7517	24.3637
											24.336	24.914
											25.3322	24.7498
											24.5353	25.1757
											24.5734	24.946
											25.208	24.8696
											25.1526	25.3392
										AAV-anti-miR-20b HFD	25.0174	25.3771
											24.9705	25.3657
											25.0239	24.8194
											25.1834	24.8423
											25.3692	25.062
											24.5177	25.0156
											24.5323	25.0437
											25.1751	25.0206
											25.3974	24.9284
											25.2179	24.8558
