# Supplementary material for: Hepatic MIR20B promotes nonalcoholic fatty liver disease by suppressing PPARA
Source: eLife. 2021 Dec 29;10:e70472. doi: 10.7554/eLife.70472 (PMC8758141; doi:10.7554/eLife.70472)
Supplement: Figure 6—figure supplement 2—source data 1. [file elife-70472-fig6-figsupp2-data1.xlsx]

## Sheet: Figure 6 Supplement 2
Source Data - Figure 6 Supplement
qPCR					vs. AAV-Control NCD	vs. AAV-Control HFD					Ppara	Rora	Rorc	Thrb	TBP
figure	Gene		mean	SEM	p value	p value	n			AAV-Control NCD	21.0975	29.1141	23.9007	26.0595	22.6194
					(t-test)	(t-test)					21.1578	28.7877	24.81	26.2885	22.4433
6 Supplement 2	Ppara	AAV-Control NCD	1	0.140494			10				20.5342	28.4498	24.9968	22.8631	23.0517
		AAV-anti-miR-20b NCD	1.94046	0.166116	0.000204964		10				20.1776	28.5763	25.5583	22.8493	22.8415
		AAV-Control HFD	0.429187	0.0491255	0.000606234		10				20.9768	28.2842	24.6295	22.7132	23.4283
		AAV-anti-miR-20b HFD	1.54785	0.241875	0.0329208	0.000128944	10				21.0692	28.6549	24.7057	22.3893	23.2084
											20.1119	28.9872	25.9303	23.7737	23.2505
					vs. AAV-Control NCD	vs. AAV-Control HFD					20.2241	28.725	25.8201	23.4659	22.1431
figure	Gene		mean	SEM	p value	p value	n				20.8324	29.0131	21.255	23.5053	22.2195
					(t-test)	(t-test)					20.8075	28.6933	22.228	23.4235	22.4828
6 Supplement 2	Rora	AAV-Control NCD	1	0.143419			10			AAV-anti-miR-20b NCD	19.7288	28.5459	24.1152	22.8893	22.8024
		AAV-anti-miR-20b NCD	1.30998	0.0843954	0.0394495		10				19.6384	28.2123	24.1035	22.7934	22.9057
		AAV-Control HFD	0.633729	0.0723879	0.0175111		10				20.3082	28.4204	24.466	23.5323	22.9294
		AAV-anti-miR-20b HFD	0.741944	0.0894447	0.072104	0.179718	10				20.3165	28.3545	24.9621	23.4888	23.2222
											20.0369	28.6125	23.1187	23.0932	22.8834
					vs. AAV-Control NCD	vs. AAV-Control HFD					20.0071	28.4409	23.6892	22.7878	22.9555
figure	Gene		mean	SEM	p value	p value	n				19.8027	28.8342	23.024	22.7895	23.4668
					(t-test)	(t-test)					19.8653	28.6235	23.6097	22.7948	23.4564
6 Supplement 2	Rorc	AAV-Control NCD	1	0.362844			10				19.9959	28.6664	23.4402	22.9763	23.4749
		AAV-anti-miR-20b NCD	1.28606	0.213881	0.252837		10				19.999	28.7581	23.7503	22.914	22.6051
		AAV-Control HFD	0.69895	0.07032	0.212991		10			AAV-Control HFD	21.0386	29.1449	24.8058	22.8182	22.6874
		AAV-anti-miR-20b HFD	0.924445	0.129771	0.423377	0.0719772	10				20.9929	29.4628	24.9123	22.4869	22.5957
											22.3188	29.2901	24.0394	22.8681	23.3765
					vs. AAV-Control NCD	vs. AAV-Control HFD					22.4516	29.1684	24.7872	22.8761	23.2122
figure	Gene		mean	SEM	p value	p value	n				21.4492	29.9763	23.8118	24.1932	22.5054
					(t-test)	(t-test)					21.3013	29.3168	23.9777	24.3941	22.5321
6 Supplement 2	Thrb	AAV-Control NCD	1	0.244721			10				22.7922	29.1395	24.5848	24.2702	23.1808
		AAV-anti-miR-20b NCD	1.41048	0.137235	0.0803534		10				22.6761	29.6609	24.5639	24.3593	23.1373
		AAV-Control HFD	0.883493	0.180525	0.35306		10				22.3285	29.2866	24.1382	24.1956	22.6989
		AAV-anti-miR-20b HFD	1.1067	0.226825	0.376414	0.225659	10				22.3226	29.9509	24.2037	24.3039	22.6287
										AAV-anti-miR-20b HFD	20.3526	28.9048	23.9408	21.5705	22.8342
											19.6789	28.8181	23.9787	23.8455	23.5439
											20.4922	29.5618	23.9824	23.3645	22.854
											20.1247	29.5363	25.0048	23.3696	22.9852
											21.0942	29.2215	25.4855	24.006	23.0092
											20.3617	29.2272	24.7549	23.9648	23.0872
											19.5883	29.6174	23.4192	23.3982	23.1779
											20.461	29.5477	23.689	23.2725	22.7491
											20.2696	29.3809	24.2594	23.5659	22.9009
											20.4241	29.3309	23.2814	23.2603	22.6226
