# Supplementary material for: Hepatic MIR20B promotes nonalcoholic fatty liver disease by suppressing PPARA
Source: eLife. 2021 Dec 29;10:e70472. doi: 10.7554/eLife.70472 (PMC8758141; doi:10.7554/eLife.70472)
Supplement: Figure 6—figure supplement 4—source data 1. [file elife-70472-fig6-figsupp4-data1.xlsx]

## Sheet: Figure 6 Supplement 4A
Source Data - Figure 6 Supplement
qPCR					vs. AAV-Control NCD	vs. AAV-Control HFD
figure	Gene		mean	SEM	p value	p value	n			Atgl	Hsl	Mgl	TBP
					(t-test)	(t-test)			AAV-Control NCD	18.3809	24.0445	21.8468	22.6642
6 Supplement 4A	Atgl	AAV-Control NCD	1	0.0849266			10			18.2078	24.0517	22.578	23.1128
		AAV-anti-miR-20b NCD	1.27411	0.212705	0.123448		10			18.1961	23.6715	22.1414	22.979
		AAV-Control HFD	0.699297	0.152665	0.0511711		10			18.2282	23.6368	21.4931	23.1998
		AAV-anti-miR-20b HFD	1.06099	0.117129	0.339165	0.0382178	10			18.213	23.6233	22.1772	22.6304
										18.2386	23.7378	22.0898	23.2889
qPCR					vs. AAV-Control NCD	vs. AAV-Control HFD				17.9433	23.3066	21.8819	23.5042
figure	Gene		mean	SEM	p value	p value	n			17.8995	23.2396	21.5923	22.9463
					(t-test)	(t-test)				18.1449	23.8489	21.6887	23.1053
6 Supplement 4A	Hsl	AAV-Control NCD	1	0.108434			10			18.2388	23.8984	21.6245	22.7079
		AAV-anti-miR-20b NCD	1.05432	0.107615	0.363141		10		AAV-anti-miR-20b NCD	18.3338	23.8949	21.5981	22.7039
		AAV-Control HFD	0.791509	0.0661787	0.0590532		10			18.1885	23.9158	21.7572	23.2999
		AAV-anti-miR-20b HFD	0.972224	0.1007	0.426606	0.0755112	10			17.8553	23.6394	21.7895	22.7675
										17.7254	23.727	21.6773	22.5404
qPCR					vs. AAV-Control NCD	vs. AAV-Control HFD				18.245	23.7238	21.483	23.1781
figure	Gene		mean	SEM	p value	p value	n			17.4824	23.9332	21.2077	23.6791
					(t-test)	(t-test)				17.5261	23.5307	21.8062	23.7783
6 Supplement 4A	Mgl	AAV-Control NCD	1	0.0928073			10			18.2026	23.4815	21.751	23.0967
		AAV-anti-miR-20b NCD	1.28052	0.164084	0.0770176		10			18.1025	23.4385	21.7685	22.6196
		AAV-Control HFD	0.847641	0.106593	0.147633		10			18.3336	23.7594	21.8643	23.3047
		AAV-anti-miR-20b HFD	1.03358	0.151034	0.425941	0.163914	10		AAV-Control HFD	18.9278	24.0881	21.9841	22.9359
										18.565	24.5415	21.9435	22.6719
										18.506	23.7913	21.9259	23.0456
										18.5487	23.6231	22.2235	22.8668
										17.8143	24.1377	21.589	22.987
										17.7646	23.9603	21.4818	23.3169
										18.7595	23.9949	23.0857	23.419
										18.6032	24.4928	23.083	23.0892
										28.4831	24.5177	22.8815	23.3003
										28.3464	24.0714	22.6133	23.4733
									AAV-anti-miR-20b HFD	18.1328	23.3113	21.9372	22.9231
										17.9706	23.2872	21.8614	22.7489
										18.168	23.5073	21.4377	23.2085
										17.8296	24.2708	21.4293	23.6485
										18.0024	23.8308	21.9322	22.6805
										18.0723	23.9803	21.9405	22.7547
										17.9534	24.2324	21.9071	23.0747
										18.2198	23.4938	21.9768	23.5341
										17.5722	23.0219	21.9857	22.4401
										18.5987	23.901	22.2295	22.4968

## Sheet: Figure 6 Supplement 4B
Source Data - Figure 6 Supplement
					vs. AAV-Control NCD	vs. AAV-Control HFD
figure			mean	SEM	p value	p value	n
					(t-test)	(t-test)
6 Supplement 4B	Serum FFA	AAV-Control NCD	0.786161	0.0284409			10
		AAV-anti-miR-20b NCD	0.736231	0.014197	0.0668242		10
		AAV-Control HFD	1.05257	0.0298551	2.22343e-06		10
		AAV-anti-miR-20b HFD	0.985697	0.0433524	0.000588643	0.110066	10
		AAV-Control NCD	AAV-anti-miR-20b NCD	AAV-Control HFD	AAV-anti-miR-20b HFD
		0.7587	0.736513	1.09305	0.980887
		0.733793	0.7987	1.04243	1.01267
		0.765153	0.710753	0.99518	1.13486
		0.89982	0.72926	0.872993	0.817473
		0.819713	0.69102	0.940727	0.980993
		0.859127	0.69438	1.08611	0.908407
		0.8915	0.79326	1.1419	0.87342
		0.60158	0.737527	1.09689	0.815927
		0.808087	0.678487	1.06526	1.11475
		0.72414	0.792407	1.19113	1.21758
