# Supplementary material for: Hepatic MIR20B promotes nonalcoholic fatty liver disease by suppressing PPARA
Source: eLife. 2021 Dec 29;10:e70472. doi: 10.7554/eLife.70472 (PMC8758141; doi:10.7554/eLife.70472)
Supplement: Figure 6—source data 1. [file elife-70472-fig6-data1.xlsx]

## Sheet: Figure 6A
Source Data - Figure 6
qPCR					vs. AAV-Control NCD	vs. AAV-Control HFD	vs. AAV-miR-20b NCD
figure	Gene		mean	SEM	p value	p value	p value	n			miR-20b	U6
					(t-test)	(t-test)	(t-test)			AAV-Control NCD	24.3694	24.9208
6A	miR-20b	AAV-Control NCD	1	0.0859218				10			24.2164	24.0934
		AAV-anti-miR-20b NCD	0.432488	0.0527044	1.21227e-05			10			23.5106	23.8733
		AAV-Control HFD	3.8109	0.393661	8.13037e-07			10			23.937	24.3905
		AAV-anti-miR-20b HFD	1.20387	0.100802	0.0705738	2.43338e-06	1.18405e-06	10			23.7897	23.3225
											23.3521	23.6895
											24.5544	23.8299
											23.5902	23.9385
											23.5803	24.1935
											24.0807	24.1692
										AAV-anti-miR-20b NCD	25.4919	23.9276
											25.6564	24.259
											25.4602	23.9442
											25.1769	24.4488
											24.8177	24.2834
											24.9465	23.9278
											24.9262	24.5061
											24.8439	24.4759
											25.5141	23.6376
											24.9722	23.3391
										AAV-Control HFD	21.751	24.1254
											22.2952	24.3012
											21.7038	24.4182
											21.9193	24.3038
											22.5649	24.2663
											22.4591	24.2417
											21.853	24.5561
											22.3225	23.7275
											22.2493	24.3025
											22.0266	23.5237
										AAV-anti-miR-20b HFD	24.2209	24.4226
											24.1904	24.3667
											22.9301	23.8118
											22.9541	23.845
											23.7733	23.8981
											23.7583	24.2011
											22.9796	23.9187
											23.9421	24.4999
											24.3252	24.3949
											23.9542	23.9179

## Sheet: Figure 6B
Source Data - Figure 6
		AAV-Control NCD	AAV-anti-miR-20b NCD	AAV-Control HFD	AAV-anti-miR-20b HFD
		0.0988658	0.282306	0.0649315	0.0943049
		0.0842759	0.157211	0.062254	0.115458
		0.120539	0.221441	0.0633763	0.166379
	Average	0.101227	0.220319	0.0635206	0.125381
	SEM	0.0105348	0.0361163	0.000776285	0.0213895
	T.TEST		0.0170013	0.0116924	0.184172
				vs AAV-anti-miR-20b NCD	0.0432544
				vs AAV-Control HFD	0.0222774

## Sheet: Figure 6DEF
Source Data - Figure 6					Fat/B.W	Lean/B.W		Liver (g)
				NCD Control 1	0.249693	0.745092		1.5
				NCD Control 2	0.287048	0.707229		1.414
				NCD Control 3	0.100592	0.900888		1.525
				NCD Control 4	0.26375	0.712812		1.459
				NCD Control 5	0.221739	0.775155		1.289
				NCD Control 6	0.254252	0.743109		1.211
				NCD Control 7	0.27439	0.719817		1.118
				NCD Control 8	0.333228	0.659177		0.987
				NCD Control 9	0.347205	0.657453		1.273
				NCD Control 10	0.356047	0.645428		1.145
				NCD antimiR20b 1	0.310542	0.683133		1.129
				NCD antimiR20b 2	0.354438	0.630473		1.309
				NCD antimiR20b 3	0.268471	0.730892		1.254
				NCD antimiR20b 4	0.227744	0.771951		1.216
				NCD antimiR20b 5	0.184615	0.817846		0.842
				NCD antimiR20b 6	0.179878	0.830793		1.307
				NCD antimiR20b 7	0.134731	0.821257		1.6
				NCD antimiR20b 8	0.187346	0.755864		0.968
				NCD antimiR20b 9	0.294817	0.705793		1.082
				NCD antimiR20b 10	0.204878	0.797561		1.04
				HFD Control 1	0.376327	0.623451		1.527
				HFD Control 2	0.318301	0.681917		1.948
				HFD Control 3	0.426141	0.569917		2.205
				HFD Control 4	0.395726	0.596581		1.73
				HFD Control 5	0.330872	0.666667		2.167
				HFD Control 6	0.37567	0.619196		1.267
				HFD Control 7	0.294243	0.691684		2.374
				HFD Control 8	0.437856	0.558206		1.418
				HFD Control 9	0.436929	0.550207		2.219
				HFD Control 10	0.390618	0.607036		2.086
				HFD antimiR20b 1	0.4125	0.58912		1.71
				HFD antimiR20b 2	0.324887	0.679412		1.49
				HFD antimiR20b 3	0.308467	0.692449		1.799
				HFD antimiR20b 4	0.261048	0.721412		1.105
				HFD antimiR20b 5	0.293512	0.696421		1.902
				HFD antimiR20b 6	0.331713	0.659954		1.073
				HFD antimiR20b 7	0.298861	0.709567		1.011
				HFD antimiR20b 8	0.326638	0.671397		1.362
				HFD antimiR20b 9	0.33136	0.647807		1.715
				HFD antimiR20b 10	0.299554	0.696429		1.653

## Sheet: Figure 6H
Source Data - Figure 6
steatosis
Mouse	#1	#2	#3	#4	#5	#6	#7	#8	#9	#10
AAV-Control NCD	0	0	0	0	0	0	0	0	0	0
AAV-anti-miR-20b NCD	0	0	0	0	0	0	0	0	0	0
AAV-Control HFD	1	2	1	1	1	1	2	1	1	1
AAV-anti-miR-20b HFD	0	0	0	0	0	1	0	1	0	1
imflammation
Mouse	#1	#2	#3	#4	#5	#6	#7	#8	#9	#10
AAV-Control NCD	0	0	1	0	1	1	0	0	0	0
AAV-anti-miR-20b NCD	0	1	0	0	0	0	0	1	0	0
AAV-Control HFD	0	2	1	2	1	1	1	2	1	1
AAV-anti-miR-20b HFD	1	0	1	1	2	0	2	1	1	1
ballooning
Mouse	#1	#2	#3	#4	#5	#6	#7	#8	#9	#10
AAV-Control NCD	0	0	0	0	0	0	0	0	0	0
AAV-anti-miR-20b NCD	0	0	0	0	0	0	0	0	0	0
AAV-Control HFD	1	2	2	2	2	1	1	1	0	1
AAV-anti-miR-20b HFD	1	0	1	1	1	0	1	0	0	0
NAS
Mouse	#1	#2	#3	#4	#5	#6	#7	#8	#9	#10
AAV-Control NCD	0	0	1	0	1	1	0	0	0	0
AAV-anti-miR-20b NCD	0	1	0	0	0	0	0	1	0	0
AAV-Control MCD	2	6	4	5	4	3	4	4	2	3
AAV-anti-miR-20b MCD	2	0	2	2	3	1	3	2	1	2

## Sheet: Figure 6I
Source Data - Figure 6
					vs. AAV-Control NCD	vs. AAV-Control HFD	vs. AAV-miR-20b NCD
figure	Gene		Average	SEM	p value	p value	p value	n			AAV-Control NCD	AAV-anti-miR-20b NCD	AAV-Control HFD	AAV-anti-miR-20b HFD
					(t-test)	(t-test)	(t-test)				37.6107	35.8307	88.2407	68.2007
6I	Triglyceride	AAV-Control NCD	34.1047	2.11278				10			45.2607	38.4507	97.6507	71.9407
		AAV-anti-miR-20b NCD	32.2797	2.41138	0.288114			10			36.8307	43.7707	84.4007	60.5207
		AAV-Control HFD	85.4577	2.77991	8.95833e-12			10			28.5007	41.2007	73.2607	54.5807
		AAV-anti-miR-20b HFD	58.2677	3.17184	2.82885e-06	2.28681e-06	6.42653e-07	10			34.5207	23.4407	94.2107	74.5707
											26.1407	25.2407	83.8607	53.2007
											37.9307	23.0107	95.7607	51.2807
											40.3507	35.3007	71.9307	53.3207
											25.1407	26.5107	84.2007	49.2407
											28.7607	30.0407	81.0607	45.8207

## Sheet: Figure 6J
Source Data - Figure 6
					vs. AAV-Control NCD	vs. AAV-Control HFD	vs. AAV-miR-20b NCD
figure			Average	SEM	p value	p value	p value	n			AAV-Control NCD	AAV-anti-miR-20b NCD	AAV-Control HFD	AAV-anti-miR-20b HFD
					(t-test)	(t-test)	(t-test)				40.5779	56.247	163.035	182.111
6J	Serum AST	AAV-Control NCD	55.3102	4.55208				10			64.4647	60.8881	181.174	138.978
		AAV-anti-miR-20b NCD	48.9276	2.68426	0.121381			10			45.0912	43.09	159.97	143.832
		AAV-Control HFD	185.279	5.60789	2.96128e-13			10			64.7628	60.9732	187.987	123.054
		AAV-anti-miR-20b HFD	127.695	7.81382	1.2158e-07	5.78525e-06	4.8884e-08	10			58.0779	50.7968	176.107	114.155
											54.5012	43.3881	207.53	103.084
											63.0596	47.0499	184.665	141.32
											40.5353	44.1971	177.725	121.01
											83.5827	34.3613	201.612	99.8054
											38.4489	48.2847	212.981	109.599

## Sheet: Figure 6K
Source Data - Figure 6
					vs. AAV-Control NCD	vs. AAV-Control HFD	vs. AAV-miR-20b NCD
figure			Average	SEM	p value	p value	p value	n
					(t-test)	(t-test)	(t-test)				AAV-Control NCD	AAV-anti-miR-20b NCD	AAV-Control HFD	AAV-anti-miR-20b HFD
6K	Serum ALT	AAV-Control NCD	63.2555	3.5366				10			51.1375	61.0584	141.363	141.192
		AAV-anti-miR-20b NCD	61.365	2.28604	0.329419			10			74.5134	63.8686	166.271	142.427
		AAV-Control HFD	182.958	11.3484	4.00873e-09			10			64.9757	54.6715	189.009	180.067
		AAV-anti-miR-20b HFD	138.735	8.20027	5.55299e-08	0.00271794	5.2394e-07	10			70.7238	59.2275	152.646	117.901
											72.2567	63.2299	204.933	168.571
											43.3881	55.0973	224.818	124.97
											57.056	76.3869	164.015	142.895
											66.3808	52.5426	139.532	160.14
											54.7993	69.1058	202.762	105.979
											77.3236	58.4611	244.234	103.212

## Sheet: Figure 6N
Source Data - Figure 6
					vs. AAV-Control NCD	vs. AAV-Control HFD				Fasting glucose
figure			Average	SEM	p value	p value	n			85
					(t-test)	(t-test)				111
6N	Fasting glucose	AAV-Control NCD	84.8	3.35923			10			82
		AAV-anti-miR-20b NCD	82.1	2.30193	0.257859		10			73
		AAV-Control HFD	137.9	5.56068	9.0147e-08		10			86
		AAV-anti-miR-20b HFD	111.9	3.82521	2.31834e-05	0.000583637	10			89
										73
										82
										81
										86
										81
										90
										70
										85
										81
										90
										82
										83
										70
										89
										112
										127
										163
										158
										132
										133
										123
										131
										163
										137
										109
										115
										93
										104
										134
										129
										112
										104
										113
										106

## Sheet: Figure 6O
Source Data - Figure 6
					vs. AAV-Control NCD	vs. AAV-Control HFD
figure			Average	SEM	p value	p value	n
					(t-test)	(t-test)
6O	Fasting Insulin	AAV-Control NCD	0.406384	0.0257809			10
		AAV-anti-miR-20b NCD	0.37085	0.0231227	0.159225		10
		AAV-Control HFD	2.11665	0.0809097	4.26885e-14		10
		AAV-anti-miR-20b HFD	1.38468	0.0487849	3.81293e-13	1.92927e-07	10
		AAV-Control NCD	AAV-anti-miR-20b NCD	AAV-Control HFD	AAV-anti-miR-20b HFD
		0.395065	0.456807	2.48208	1.59261
		0.548777	0.484463	2.53289	1.38326
		0.484141	0.392492	2.07529	1.57074
		0.345221	0.328499	1.77108	1.21283
		0.440085	0.298592	2.138	1.41831
		0.272545	0.365802	2.23318	1.58682
		0.328499	0.265792	1.80613	1.35046
		0.380272	0.338468	2.0277	1.20318
		0.468062	0.450376	1.91965	1.23502
		0.401175	0.327213	2.18045	1.29354

## Sheet: Figure 6P
Source Data - Figure 6
					vs. AAV-Control NCD	vs. AAV-Control HFD				HOMA-IR
figure			Average	SEM	p value	p value	n			2.07098
					(t-test)	(t-test)				3.75654
6P	HOMA-IR	AAV-Control NCD	2.15267	0.211639			10			2.44793
		AAV-anti-miR-20b NCD	1.87252	0.123307	0.133855		10			1.55398
		AAV-Control HFD	17.8611	0.633149	2.86146e-15		10			2.334
		AAV-anti-miR-20b HFD	9.57488	0.521552	5.45036e-11	3.82194e-09	10			1.49557
										1.4788
										1.92305
										2.33816
										2.1277
										2.28172
										2.68897
										1.69429
										1.72189
										1.49151
										2.03019
										1.34406
										1.73256
										1.94423
										1.79578
										17.143
										19.8368
										20.8602
										17.2564
										17.4033
										18.316
										13.6993
										16.3804
										19.2952
										18.4207
										10.7049
										9.8099
										9.00796
										7.77809
										11.7199
										12.623
										9.32745
										7.71652
										8.60589
										8.45518

[truncated: 2 more sheets: Figure 6Q, Figure 6R]
