# Supplementary material for: Hepatic MIR20B promotes nonalcoholic fatty liver disease by suppressing PPARA
Source: eLife. 2021 Dec 29;10:e70472. doi: 10.7554/eLife.70472 (PMC8758141; doi:10.7554/eLife.70472)
Supplement: Figure 7—source data 1. [file elife-70472-fig7-data1.xlsx]

## Sheet: Figure 7A
Source Data - Figure 7
qPCR					vs. AAV-Control HFD	vs. AAV-miR-20b HFD	vs. AAV-Control HFD + Fenofibrate				mIR-20b	U6
figure	Gene		mean	SEM	p value	p value	p value	n		AAV-Vector HFD	27.0027	26.5048
					(t-test)	(t-test)	(t-test)				27.4718	27.1974
7A	miR-20b	AAV-Control HFD	1	0.177392				3			27.5379	26.3326
		AAV-Control HFD + Fenofibrate	0.693223	0.0501813	0.0400172			5		AAV-Vector HFD + Fenofibrate	27.2645	26.4695
		AAV-miR-20b HFD	6.65177	0.425761	6.00495e-05			4			28.3249	27.005
		AAV-miR-20b HFD + Fenofibrate	5.01175	0.394369	0.000155472	0.0130086	2.28041e-06	5			27.6549	26.5531
											28.1197	26.9223
											28.803	27.4652
										AAV-miR-20b-5p HFD	25.7153	27.8229
											25.2974	27.6309
											24.8324	26.9806
											24.8127	26.6913
										AAV-miR-20b-5p HFD + Fenofibrate	25.2565	27.0453
											26.279	28.3248
											25.3383	26.7555
											25.2985	26.7954
											25.3125	27.0639

## Sheet: Figure 7B
Source Data - Figure 7
	AAV-Control	AAV-Control + Fenofibrate	AAV-miR-20b	AAV-miR-20b + Fenofibrate
	0.0273649	0.0571429	0.0113699	0.0158006
	0.0178276	0.0574194	0.0119685	0.0161922
	0.0170476	0.0232588	0.0154985	0.0352071
	AAV-Control	AAV-Control + Fenofibrate	AAV-miR-20b	AAV-miR-20b + Fenofibrate
Average	0.0207467	0.0459403	0.0129456	0.0224
SEM	0.00331674	0.0113411	0.00128808	0.00640457
T.TEST		0.0499832	0.0467157	0.414969
			vs. AAV-miR-20b	0.110696
			vs. AAV-Control HFD + Feno	0.0724934

## Sheet: Figure 7DEF
Source Data - Figure 7
					Fat/B.W	Lean/B.W	Liver/B.W
				HFD Control 1	0.227374	0.664525	0.037869
				HFD Control 2	0.254861	0.869907	0.038772
				HFD Control 3	0.253828	0.748804	0.035561
				HFD Control Fenofibrate 1	0.138926	0.837584	0.029745
				HFD Control Fenofibrate 2	0.187536	0.792464	0.035148
				HFD Control Fenofibrate 3	0.133628	0.850442	0.034077
				HFD Control Fenofibrate 4	0.146532	0.863584	0.029792
				HFD Control Fenofibrate 5	0.283582	0.816915	0.032217
				HFD miR20b 1	0.239252	0.618458	0.038629
				HFD miR20b 2	0.380376	0.541127	0.042375
				HFD miR20b 3	0.319778	0.557778	0.041083
				HFD miR20b 4	0.372345	0.503097	0.040115
				HFD miR20b Fenofibrate 1	0.279341	0.702994	0.029024
				HFD miR20b Fenofibrate 2	0.315336	0.573739	0.037405
				HFD miR20b Fenofibrate 3	0.296552	0.614589	0.037599
				HFD miR20b Fenofibrate 4	0.274442	0.715136	0.038092
				HFD miR20b Fenofibrate 5	0.299757	0.680535	0.040443

## Sheet: Figure 7H
steatosis	1	2	3	4	5
AAV-Control HFD	2	1	1	X	X		1.33333
AAV-Control HFD + Fenofibrate	1	0	1	1	X		0.75
AAV-miR-20b HFD	2	2	3	3	1		2.2
AAV-miR-20b HFD + Fenofibrate	2	2	2	2	2		2
imflammation	1	2	3	4	5
AAV-Control HFD	1	2	1	X	X		1.33333
AAV-Control HFD + Fenofibrate	0	1	1	0	0		0.4
AAV-miR-20b HFD	2	2	2	2	X		2
AAV-miR-20b HFD + Fenofibrate	2	2	2	1	1		1.6
ballooning	1	2	3	4	5
AAV-Control HFD	1	1	1	X	X		1
AAV-Control HFD + Fenofibrate	0	0	0	0	0		0
AAV-miR-20b HFD	2	1	2	1	X		1.5
AAV-miR-20b HFD + Fenofibrate	1	2	2	1	2		1.6
NAS	1	2	3	4	5
AAV-Control HFD	4	4	3	X	X
AAV-Control HFD + Fenofibrate	1	1	2	1	0
AAV-miR-20b HFD	6	5	7	6	X
AAV-miR-20b HFD + Fenofibrate	5	6	6	4	5

## Sheet: Figure 7I
Source Data - Figure 7
					vs. AAV-Control HFD	vs. AAV-miR-20b HFD	vs. AAV-Control HFD + Fenofibrate
figure			Average	SEM	p value	p value	p value	n			AAV-Control HFD	AAV-Control HFD + Fenofibrate	AAV-miR-20b HFD	AAV-miR-20b HFD + Fenofibrate
					(t-test)	(t-test)	(t-test)				78.1498	76.1998	115.35	70.3498
7I	Triglyceride	AAV-Control HFD	78.0998	2.2951				3			74.0998	71.3998	117.3	100.2
		AAV-Control HFD + Fenofibrate	63.1198	5.56304	0.048181			5			82.0498	51.8998	84.5998	110.55
		AAV-miR-20b HFD	110.287	8.75572	0.014133			4				47.9998	123.9	102.45
		AAV-miR-20b HFD + Fenofibrate	97.9798	7.12877	0.0425432	0.153225	0.00242111	5				68.0998		106.35

## Sheet: Figure 7J
Source Data - Figure 7
					vs. AAV-Control HFD	vs. AAV-miR-20b HFD	vs. AAV-Control HFD + Fenofibrate
figure			Average	SEM	p value	p value	p value	n			AAV-Control HFD	AAV-Control HFD + Fenofibrate	AAV-miR-20b HFD	AAV-miR-20b HFD + Fenofibrate
					(t-test)	(t-test)	(t-test)				217.664	182.068	247.597	225.669
7J	Serum AST	AAV-Control HFD	201.74	8.96964				3			200.931	170.7	281.618	183.26
		AAV-Control HFD + Fenofibrate	180.459	5.21011	0.0336881			5			186.624	186.794	225.414	235.036
		AAV-miR-20b HFD	241.668	15.2013	0.0478977			4				195.566	212.044	225.669
		AAV-miR-20b HFD + Fenofibrate	224.196	11.2575	0.109693	0.187849	0.00388943	5				167.165		251.344

## Sheet: Figure 7K
Source Data - Figure 7
					vs. AAV-Control HFD	vs. AAV-miR-20b HFD	vs. AAV-Control HFD + Fenofibrate
figure			Average	SEM	p value	p value	p value	n
					(t-test)	(t-test)	(t-test)				AAV-Control HFD	AAV-Control HFD + Fenofibrate	AAV-miR-20b HFD	AAV-miR-20b HFD + Fenofibrate
7K	Serum ALT	AAV-Control HFD	212.711	11.4533				3			213.662	167.804	251.983	221.667
		AAV-Control HFD + Fenofibrate	172.956	10.2912	0.0241026			5			232.056	146.983	280.724	213.875
		AAV-miR-20b HFD	248.641	12.5986	0.0492124			4			192.415	205.955	241.807	240.274
		AAV-miR-20b HFD + Fenofibrate	233.18	8.05959	0.0917474	0.158537	0.00086945	5				184.793	220.049	229.842
												159.246		260.243

## Sheet: Figure 7N
Source Data - Figure 7
					vs. AAV-Control HFD	vs. AAV-miR-20b HFD	vs. AAV-Control HFD + Fenofibrate			Fasting glucose
figure			Average	SEM	p value	p value	p value	n		98
					(t-test)	(t-test)	(t-test)			82
7N	Fasting glucose	AAV-Control HFD	101.667	12.5477				3		125
		AAV-Control HFD + Fenofibrate	71.6	1.77764	0.00957926			5		146
		AAV-miR-20b HFD	134.667	5.50757	0.0394354			4		134
		AAV-miR-20b HFD + Fenofibrate	104.8	6.96707	0.409112	0.0141073	0.000858061	5		124
										71
										77
										73
										66
										71
										83
										94
										116
										119
										112

## Sheet: Figure 7O
Source Data - Figure 7
					vs. AAV-Control HFD	vs. AAV-miR-20b HFD	vs. AAV-Control HFD + Fenofibrate
figure			Average	SEM	p value	p value	p value	n		AAV-Control HFD	AAV-Control HFD + Fenofibrate	AAV-miR-20b HFD	AAV-miR-20b HFD + Fenofibrate
					(t-test)	(t-test)	(t-test)			2.2327	1.65	2.4787	2.5044
7O	Fasting insulin	AAV-Control HFD	2.24553	0.177968				3		2.56	2.18604	2.6186	1.9842
		AAV-Control HFD + Fenofibrate	1.72443	0.13835	0.0301633			5		1.9439	1.5361	2.8555	2.4038
		AAV-miR-20b HFD	2.61227	0.0868384	0.0492303			4			1.3916	2.4963	2.2877
		AAV-miR-20b HFD + Fenofibrate	2.3642	0.111364	0.284806	0.0682632	0.00347969	5			1.8584		2.6409

## Sheet: Figure 7P
Source Data - Figure 7
					vs. AAV-Control HFD	vs. AAV-miR-20b HFD	vs. AAV-Control HFD + Fenofibrate				HOMA-IR
figure			Average	SEM	p value	p value	p value	n			13.493
					(t-test)	(t-test)	(t-test)				12.9451
7P	HOMA-IR	AAV-Control HFD	13.8074	0.609293				3			14.9842
		AAV-Control HFD + Fenofibrate	7.66396	0.785986	0.000835142			5			7.22425
		AAV-miR-20b HFD	20.9214	1.57543	0.00713782			4			10.38
		AAV-miR-20b HFD + Fenofibrate	15.3086	1.3235	0.220499	0.0142588	0.000549072	5			6.91501
											5.66381
											8.13669
											17.4253
											23.5761
											23.5959
											19.0884
											12.8184
											11.5017
											17.1952
											16.7879
											18.2398

[truncated: 1 more sheets: Figure 7Q]
