# Supplementary material for: Hepatic MIR20B promotes nonalcoholic fatty liver disease by suppressing PPARA
Source: eLife. 2021 Dec 29;10:e70472. doi: 10.7554/eLife.70472 (PMC8758141; doi:10.7554/eLife.70472)
Supplement: Figure 8—source data 1. [file elife-70472-fig8-data1.xlsx]

## Sheet: Figure 8C
Source Data - Figure 8
qPCR					vs. AAV-Control NCD	vs. AAV-Control MCD				miR-20b	U6
figure	Gene		mean	SEM	p value	p value	n		AAV-Control NCD	18.9213	21.0958
					(t-test)	(t-test)				18.5893	20.6604
8C	miR-20b	AAV-Control NCD	1	0.0972733			5			18.4637	20.4753
		AAV-anti-miR-20b NCD	0.617167	0.149487	0.0320602		5			19.1524	20.6246
		AAV-Control MCD	2.70392	0.309147	0.000576902		5			17.2674	19.6619
		AAV-anti-miR-20b MCD	1.20664	0.127349	0.116631	0.00147878	5		anti-AAV-miR-20b NCD	17.899	20.22
										17.175	18.3851
										17.8789	18.6447
										18.0559	19.1694
										18.6977	19.4213
									AAV-Control MCD	18.076	21.2185
										17.7981	20.966
										17.4693	21.1915
										17.0753	20.9035
										17.3354	20.46
									anti-AAV-miR-20b MCD	17.0361	19.5714
										16.9394	19.6066
										16.6592	18.765
										16.8297	19.218
										17.0373	18.7973

## Sheet: Figure 8E
	AAV-Control NCD	AAV-anti-miR-20b NCD	AAV-Control MCD	AAV-anti-miR-20b-5p MCD
	0.0214286	0.0212	0.0272171	0.0633772
	0.0118435	0.0264644	0.0237383	0.0461438
	0.0130508	0.0396614	0.0292793	0.0337789
Average	0.015441	0.0291086	0.0267449	0.0477666
SEM	0.00301403	0.0054909	0.00161687	0.00858274
T.TEST		0.0472648	0.0148977	0.0118609
			vs. AAV-Control MCD	0.0368987

## Sheet: Figure 8F
Source Data - Figure 8
qPCR					vs. AAV-Control NCD	vs. AAV-Control MCD
figure	Gene		mean	SEM	p value	p value	n			Ppara	TBP
					(t-test)	(t-test)			AAV-Vector	22.7299	26.3021
8F	Ppara	AAV-Control NCD	1	0.0644371			5			22.6879	26.2721
		AAV-anti-miR-20b NCD	1.80362	0.0710074	0.000145687		5			23.2004	26.3091
		AAV-Control MCD	1.43162	0.0748593	0.00235422		5			23.8785	28.0337
		AAV-anti-miR-20b MCD	2.3853	0.20099	0.000540648	0.00150596	5			22.0334	25.5154
									AAV-anti-miR-20b-5p	22.1375	26.4116
										21.1167	25.5003
										22.2039	26.2671
										22.9894	27.3942
										23.0584	27.1787
									AAV-Vector	22.8426	26.8339
										22.5487	26.6158
										22.0391	26.0535
										22.3086	25.9467
										22.6102	26.6895
									AAV-anti-miR-20b-5p	21.8083	26.0428
										21.7888	25.7757
										21.6728	26.5541
										21.7871	26.6297
										21.7406	26.5071

## Sheet: Figure 8I
Source Data - Figure 8
steatosis	1	2	3	4	5
AAV-Control NCD	0	0	0	0	0
AAV-anti-miR-20b NCD	0	0	0	0	0
AAV-Control MCD	1	1	2	2	1
AAV-anti-miR-20b MCD	1	1	0	0	0
imflammation	1	2	3	4	5
AAV-Control NCD	1	0	0	1	0
AAV-anti-miR-20b NCD	1	0	0	1	0
AAV-Control MCD	2	2	3	3	2
AAV-anti-miR-20b MCD	1	2	1	1	1
ballooning	1	2	3	4	5
AAV-Control NCD	0	0	0	0	0
AAV-anti-miR-20b NCD	0	0	0	0	0
AAV-Control MCD	0	0	1	1	2
AAV-anti-miR-20b MCD	0	1	0	0	0
NAS	1	2	3	4	5
AAV-Control NCD	1	0	0	1	0
AAV-anti-miR-20b NCD	1	0	0	1	0
AAV-Control MCD	3	3	6	6	5
AAV-anti-miR-20b MCD	2	4	1	1	1

## Sheet: Figure 8J
fibrosis score	1	2	3	4	5	6		Fibrosis score	converted fibrosis score
MCD	1b	1b	2	1c	1c	1b		0	0
MCD feno	0	1a	1b	1b	1a	1c		1a	1
MCD anti	1b	1b	1b	1c	1a	1a		1b	2
MCD anti feno	1a	0	0	0	0			1c	3
								2	4
								3	5
converted fibrosis score	1	2	3	4	5	6		4	6
MCD	2	2	4	3	3	2
MCD feno	0	1	2	2	1	3
MCD anti	2	2	2	3	1	1
MCD anti feno	1	0	0	0	0

## Sheet: Figure 8K
Source Data - Figure 8
					vs. AAV-Control NCD	vs. AAV-Control MCD				AAV-Control NCD	AAV-anti-miR-20b NCD	AAV-Control MCD	AAV-anti-miR-20b MCD
figure			Average	SEM	p value	p value	n			34.0498	39.6748	78.0898	75.1948
					(t-test)	(t-test)				28.7998	37.3198	81.8698	57.8848
8K	Triglyceride	AAV-Control NCD	32.6578	2.21941			5			37.7848	20.7148	72.3748	62.2798
		AAV-anti-miR-20b NCD	30.6448	3.76964	0.328822		5			26.2348	23.1298	94.1998	66.4048
		AAV-Control MCD	81.0988	3.61917	1.57261e-06		5			36.4198	32.3848	78.9598	52.6948
		AAV-anti-miR-20b MCD	62.8918	3.82837	6.66845e-05	0.00430941	5

## Sheet: Figure 8L
Source Data - Figure 8
					vs. AAV-Control NCD	vs. AAV-Control MCD					AAV-Control NCD	AAV-anti-miR-20b NCD	AAV-Control MCD	AAV-anti-miR-20b MCD
figure			Average	SEM	p value	p value	n				49.4343	80.6022	291.582	153.838
					(t-test)	(t-test)					31.8066	35.2555	262.074	209.787
8L	Serum AST	AAV-Control NCD	55.7275	9.91307			5				48.1144	64.9757	272.506	167.932
		AAV-anti-miR-20b NCD	50.2007	10.1456	0.353488		5				91.6727	45.9428	274.592	257.092
		AAV-Control MCD	278.833	5.97475	2.72129e-08		5				57.6095	24.2275	293.412	269.313
		AAV-anti-miR-20b MCD	211.592	23.0726	0.00012876	0.0112252	5

## Sheet: Figure 8M
Source Data - Figure 8
					vs. AAV-Control NCD	vs. AAV-Control MCD
figure			Average	SEM	p value	p value	n			AAV-Control NCD	AAV-anti-miR-20b NCD	AAV-Control MCD	AAV-anti-miR-20b MCD
					(t-test)	(t-test)				67.4878	80.1338	258.838	223.881
8M	Serum ALT	AAV-Control NCD	68.8418	6.08801			5			49.9453	85.1582	219.58	204.891
		AAV-anti-miR-20b NCD	63.6557	8.04094	0.310503		5			83.753	57.354	249.428	192.628
		AAV-Control MCD	239.592	9.1406	1.4587e-07		5			62.9745	50.7968	215.535	184.282
		AAV-anti-miR-20b MCD	210.86	11.5536	2.26176e-06	0.043475	5			80.0487	44.8358	254.58	248.619

## Sheet: Figure 8N
Source Data - Figure 8
qPCR					vs. AAV-Control NCD	vs. AAV-Control MCD
figure	Gene		mean	SEM	p value	p value	n				Ppara	Tnf	Ccl2	Il6	Il1b	TBP
					(t-test)	(t-test)				AAV-Vector	22.7299	32.8907	32.7593	25.174	30.8631	26.3021
8N	Tnf	AAV-Control NCD	1	0.44006			5				22.6879	29.9746	29.9339	20.1225	31.052	26.2721
		AAV-anti-miR-20b NCD	0.591077	0.0921115	0.194825		5				23.2004	32.0779	33.2607	23.0469	30.7525	26.3091
		AAV-Control MCD	4.2443	1.14216	0.0146151		5				23.8785	33.1577	33.2352	25.2078	28.8367	28.0337
		AAV-anti-miR-20b MCD	1.81983	0.14179	0.0570625	0.03412	5				22.0334	32.3742	33.1545	25.1578	30.4457	25.5154
										AAV-anti-miR-20b-5p	22.1375	32.2171	32.9516	26.4798	34.2324	26.4116
					vs. AAV-Control NCD	vs. AAV-Control MCD					21.1167	31.7349	30.789	24.4595	31.8781	25.5003
figure	Gene		mean	SEM	p value	p value	n				22.2039	32.1356	31.9456	24.7401	29.6491	26.2671
					(t-test)	(t-test)					22.9894	32.6665	31.9625	26.9621	30.9504	27.3942
8N	Ccl2	AAV-Control NCD	1	0.526532			5				23.0584	33.783	32.6794	26.4008	31.514	27.1787
		AAV-anti-miR-20b NCD	0.9191	0.197228	0.444575		5			AAV-Vector	22.8426	30.926	30.4876	19.9271	25.917	26.8339
		AAV-Control MCD	6.33994	1.36737	0.00417719		5				22.5487	30.6522	29.6382	18.6826	25.9241	26.6158
		AAV-anti-miR-20b MCD	4.18706	0.431076	0.000787365	0.0878141	5				22.0391	28.7279	28.0058	19.2019	24.6849	26.0535
											22.3086	28.0622	27.0685	20.6877	23.4252	25.9467
					vs. AAV-Control NCD	vs. AAV-Control MCD					22.6102	30.0225	28.9986	20.1678	25.3621	26.6895
figure	Gene		mean	SEM	p value	p value	n			AAV-anti-miR-20b-5p	21.8083	30.2531	29.4432	21.0657	25.4719	26.0428
					(t-test)	(t-test)					21.7888	29.9604	29.2711	18.8501	25.2138	25.7757
8N	Il6	AAV-Control NCD	1	0.352178			5				21.6728	31.3488	29.9748	19.9454	25.2952	26.5541
		AAV-anti-miR-20b NCD	0.355579	0.0652751	0.0556106		5				21.7871	30.736	29.3901	21.8085	25.4038	26.6297
		AAV-Control MCD	21.6605	1.34064	1.93885e-05		5				21.7406	30.6442	29.5334	21.3969	25.0457	26.5071
		AAV-anti-miR-20b MCD	9.52292	2.94523	0.0211677	0.0165051	5
					vs. AAV-Control NCD	vs. AAV-Control MCD
figure	Gene		mean	SEM	p value	p value	n
					(t-test)	(t-test)
8N	Il1b	AAV-Control NCD	1	0.730683			5
		AAV-anti-miR-20b NCD	0.337931	0.126661	0.199016		5
		AAV-Control MCD	14.7035	1.44688	3.51277e-05		5
		AAV-anti-miR-20b MCD	13.1619	1.56561	0.000109238	0.27085	5

## Sheet: Figure 8O
Source Data - Figure 8
qPCR					vs. AAV-Control NCD	vs. AAV-Control MCD
figure	Gene		mean	SEM	p value	p value	n
					(t-test)	(t-test)					Acta2	Col1a1	Col3a1	Fn	Timp1	Vim	TBP
8O	Acta2	AAV-Control NCD	1	0.214204			5			AAV-Vector	27.1651	29.9044	24.7216	18.6078	28.8519	20.9954	26.3021
		AAV-anti-miR-20b NCD	0.733725	0.0972574	0.145234		5				27.0792	27.7457	23.8762	18.9897	29.5685	20.4275	26.2721
		AAV-Control MCD	2.40048	0.224323	0.00098111		5				26.863	28.9488	25.5844	19.3081	30.5757	19.4365	26.3091
		AAV-anti-miR-20b MCD	1.38583	0.16866	0.0973707	0.00341447	5				31.0621	32.4722	24.7146	21.3398	30.9555	24.8994	28.0337
											26.9719	27.7574	24.9641	18.948	29.5167	19.1724	25.5154
					vs. AAV-Control NCD	vs. AAV-Control MCD				AAV-anti-miR-20b-5p	27.6524	30.2189	26.8849	19.9149	37.1039	19.1104	26.4116
figure	Gene		mean	SEM	p value	p value	n				27.456	29.1131	25.7063	18.8505	31.0119	19.9844	25.5003
					(t-test)	(t-test)					28.5777	28.5411	26.0579	19.5503	31.9139	19.1423	26.2671
8O	Col1a1	AAV-Control NCD	1	0.320792			5				28.736	30.8619	26.381	20.9186	32.967	19.5694	27.3942
		AAV-anti-miR-20b NCD	0.539139	0.0634978	0.125945		5				28.4907	30.1499	27.1524	20.7045	34.0307	19.353	27.1787
		AAV-Control MCD	10.6623	3.04133	0.00670273		5			AAV-Vector	26.8003	26.6899	25.4541	19.8998	27.6387	15.0449	26.8339
		AAV-anti-miR-20b MCD	3.80687	0.702009	0.00331058	0.0296654	5				26.5404	26.8028	25.4866	19.7237	27.213	15.2392	26.6158
											26.1582	24.1924	22.9479	19.4645	24.6849	15.0138	26.0535
					vs. AAV-Control NCD	vs. AAV-Control MCD					25.9657	24.6793	23.1769	19.3004	24.4912	14.8111	25.9467
figure	Gene		mean	SEM	p value	p value	n				26.1029	26.488	25.2976	19.6415	26.8113	14.8666	26.6895
					(t-test)	(t-test)				AAV-miR-20b-5p	26.9964	26.0753	24.8824	19.2844	26.1885	14.9052	26.0428
8O	Col3a1	AAV-Control NCD	1	0.182714			5				27.0108	26.0681	24.7946	19.165	26.4734	15.0063	25.7757
		AAV-anti-miR-20b NCD	0.621222	0.11332	0.093482		5				26.7941	27.0224	25.4162	19.2357	27.1109	14.9486	26.5541
		AAV-Control MCD	2.95518	0.674578	0.0480667		5				27.0226	27.8534	26.1365	19.3822	28.2869	14.9542	26.6297
		AAV-anti-miR-20b MCD	0.869937	0.115623	0.297038	0.00946085	5				27.1892	28.1061	26.4513	19.4757	28.1325	15.3969	26.5071
					vs. AAV-Control NCD	vs. AAV-Control MCD
figure	Gene		mean	SEM	p value	p value	n
					(t-test)	(t-test)
8O	Fn	AAV-Control NCD	1	0.101418			5
		AAV-anti-miR-20b NCD	0.786188	0.0280158	0.0400378		5
		AAV-Control MCD	1.03261	0.0260935	0.410709		5
		AAV-anti-miR-20b MCD	1.14212	0.0856023	0.187574	0.195558	5
					vs. AAV-Control NCD	vs. AAV-Control MCD
figure	Gene		mean	SEM	p value	p value	n
					(t-test)	(t-test)
8O	Timp1	AAV-Control NCD	1	0.212003			5
		AAV-anti-miR-20b NCD	0.139036	0.0405619	0.00200617		5
		AAV-Control MCD	14.4091	4.6295	0.0100468		5
		AAV-anti-miR-20b MCD	5.47554	1.07756	0.00177868	0.0484928	5
					vs. AAV-Control NCD	vs. AAV-Control MCD
figure	Gene		mean	SEM	p value	p value	n
					(t-test)	(t-test)
8O	Vim	AAV-Control NCD	1	0.157691			5
		AAV-anti-miR-20b NCD	1.86838	0.39242	0.0807486		5
		AAV-Control MCD	33.2466	3.72834	0.000319829		5
		AAV-anti-miR-20b MCD	29.5433	3.40519	0.000378051	0.242119	5
