# Supplementary material for: Hepatic MIR20B promotes nonalcoholic fatty liver disease by suppressing PPARA
Source: eLife. 2021 Dec 29;10:e70472. doi: 10.7554/eLife.70472 (PMC8758141; doi:10.7554/eLife.70472)
Supplement: Figure 9—source data 1. [file elife-70472-fig9-data1.xlsx]

## Sheet: Figure 9A
Source Data - Figure 9
qPCR					vs. AAV-Control MCD	vs. AAV-anti-miR-20b MCD	vs. AAV-Control MCD + Fenofibrate
figure	Gene		mean	SEM	p value	p value	p value	n
					(t-test)	(t-test)	(t-test)
9A	miR-20b	AAV-Control MCD	1	0.126633				6
		AAV-anti-miR-20b MCD	0.604437	0.0823968	0.0128378			6
		AAV-Control MCD + Fenofibrate	0.496174	0.0661775	0.00274094			6
		AAV-anti-miR-20b MCD + Fenofibrate	0.350943	0.0229066	0.000657862	0.011925	0.0442139	5
			miR-20b	U6
		AAV-Control	21.0963	26.9857
			21.2193	25.9779
			21.1617	27.2675
			20.9248	27.0327
			20.6121	26.5716
			20.7255	27.1306
		AAV-anti-miR-20b	21.5007	27.3789
			21.5305	26.7031
			21.1727	26.585
			21.3592	26.4993
			20.8918	25.7428
			21.1247	25.6326
		AAV-Control + Feno	21.9895	27.3054
			21.9383	26.7714
			21.742	26.8357
			21.711	27.1253
			21.5079	25.9491
			21.5752	25.6885
		AAV-anti-miR-20b + Feno	21.3953	25.4376
			21.5285	25.9311
			21.4467	25.9842
			21.1091	25.7273
			21.4563	25.9886

## Sheet: Figure 9B
		AAV-Control MCD	AAV-anti-miR-20b	AAV-Control HFD + Feno	AAV-anti-miR-20b + Feno
		0.0340239	0.16391	0.146245	0.343972
		0.0786026	0.145643	0.132353	0.333333
		0.0622137	0.164427	0.110331	0.226471
	Average	0.0582801	0.157993	0.129643	0.301259
	SEM	0.0130182	0.00617686	0.0104558	0.0375199
	T.TEST		0.00114423	0.00645487	0.00180712
				vs AAV-anti-miR-20b HFD	0.00982202
				vs AAV-Control MCD + Fenofibrate	0.00581789

## Sheet: Figure 9C
Source Data - Figure 9
qPCR					vs. AAV-Control MCD	vs. AAV-anti-miR-20b MCD	vs. AAV-Control MCD + Fenofibrate
figure	Gene		mean	SEM	p value	p value	p value	n
					(t-test)	(t-test)	(t-test)
9C	Ppara	AAV-Control MCD	1	0.188578				6
		AAV-anti-miR-20b MCD	1.55312	0.232262	0.047116			6
		AAV-Control MCD + Fenofibrate	1.50313	0.160593	0.0348275			6
		AAV-anti-miR-20b MCD + Fenofibrate	2.21577	0.232921	0.00132623	0.0146144	0.0384789	5
			Ppara	TBP
		AAV-Control	26.3275	27.02
			25.8049	26.72
			25.3289	26.59
			26.5876	26.08
			25.2833	27.14
			25.883	27.25
		AAV-anti-miR-20b	25.1031	26.86
			25.2453	26.63
			25.6036	26.59
			25.3263	26.95
			25.2275	27.21
			24.4162	26.5
		AAV-Control + Feno	25.5402	27.28
			24.9878	26.45
			25.5239	26.61
			25.0613	26.19
			24.5879	26.71
			24.272	26.63
		AAV-anti-miR-20b + Feno	24.4242	26.78
			25.0195	27.43
			25.315	26.98
			25.3801	27.96
			24.6803	26.7

## Sheet: Figure 9E
Source Data - Figure 9
					vs. AAV-Control MCD	vs. AAV-anti-miR-20b MCD	vs. AAV-Control MCD + Fenofibrate
figure			mean	SEM	p value	p value	p value	n		AAV-Control MCD	AAV-anti-miR-20b MCD	AAV-Control MCD + Fenofibrate	AAV-anti-miR-20b MCD + Fenofibrate
					(t-test)	(t-test)	(t-test)			85.0973	71.1585	79.011	59.4697
9E	Triglyceride	AAV-Control MCD	85.3579	4.82596				6		75.3998	89.1135	63.3623	44.4735
		AAV-anti-miR-20b MCD	70.2679	5.03075	0.0195982			6		105.359	61.4273	79.9222	48.6472
		AAV-Control MCD + Fenofibrate	69.5085	4.24022	0.0111062			6		81.2047	56.7923	65.3422	69.606
		AAV-anti-miR-20b MCD + Fenofibrate	56.5065	5.01001	0.000685982	0.0315225	0.0273096	5		77.5485	68.9423	73.3522	60.336
										87.5385	74.1735	56.061

## Sheet: Figure 9G
Source Data - Figure 9
steatosis
Mouse	#1	#2	#3	#4	#5	#6
MCD	1	1	2	2	2	1
MCD feno	1	1	1	0	0	1
MCD anti	1	1	0	1	0	1
MCD anti feno	0	0	0	0	0
imflammation
Mouse	#1	#2	#3	#4	#5	#6
MCD	3	3	3	3	3	3
MCD feno	2	2	3	3	3	3
MCD anti	2	3	2	3	1	3
MCD anti feno	1	1	1	0	2
ballooning
Mouse	#1	#2	#3	#4	#5	#6
MCD	1	2	2	2	2	1
MCD feno	1	1	1	1	1	2
MCD anti	1	1	1	2	1	2
MCD anti feno	1	1	1	1	1
Mouse	#1	#2	#3	#4	#5	#6
MCD	5	6	7	7	7	5
MCD anti	4	5	3	6	2	6
MCD feno	4	4	5	4	4	6
MCD anti feno	2	2	2	1	3

## Sheet: Figure 9H
Source Data - Figure 9
fibrosis score
Mouse	#1	#2	#3	#4	#5	#6
MCD	1b	1b	2	1c	1c	1b
MCD feno	0	1a	1b	1b	1a	1c
MCD anti	1b	1b	1b	1c	1a	1a
MCD anti feno	1a	0	0	0	0				Fibrosis score	converted fibrosis score
									0	0
converted fibrosis score									1a	1
Mouse	#1	#2	#3	#4	#5	#6			1b	2
MCD	2	2	4	3	3	2			1c	3
MCD feno	0	1	2	2	1	3			2	4
MCD anti	2	2	2	3	1	1			3	5
MCD anti feno	1	0	0	0	0				4	6

## Sheet: Figure 9I
Source Data - Figure 9
					vs. AAV-Control MCD	vs. AAV-anti-miR-20b MCD	vs. AAV-Control MCD + Fenofibrate
figure			mean	SEM	p value	p value	p value	n			AAV-Control MCD	AAV-anti-miR-20b MCD	AAV-Control MCD + Fenofibrate	AAV-anti-miR-20b MCD + Fenofibrate
					(t-test)	(t-test)	(t-test)				281.873	235.718	242.743	161.29
9I	Serum AST	AAV-Control MCD	285.039	7.59085				6			269.866	238.315	213.236	119.094
		AAV-anti-miR-20b MCD	237.059	9.67226	0.00147504			6			291.071	261.861	223.668	165.675
		AAV-Control MCD + Fenofibrate	209.163	15.9908	0.000797459			6			291.411	240.146	140.596	177.895
		AAV-anti-miR-20b MCD + Fenofibrate	166.774	14.645	1.74707e-05	0.00127268	0.0435103	5			261.606	253.09	244.574	209.915
											314.404	193.224	190.158

## Sheet: Figure 9J
Source Data - Figure 9
					vs. AAV-Control MCD	vs. AAV-anti-miR-20b MCD	vs. AAV-Control MCD + Fenofibrate
figure			mean	SEM	p value	p value	p value	n			AAV-Control MCD	AAV-anti-miR-20b MCD	AAV-Control MCD + Fenofibrate	AAV-anti-miR-20b MCD + Fenofibrate
					(t-test)	(t-test)	(t-test)				282.427	261.819	224.945	144.811
9J	Serum ALT	AAV-Control MCD	272.84	7.38774				6			274.678	213.321	199.526	136.679
		AAV-anti-miR-20b MCD	206.388	14.0424	0.000931954			6			278.978	219.836	211.107	153.455
		AAV-Control MCD + Fenofibrate	206.679	11.1004	0.000284268			6			279.191	172.573	171.125	208.254
		AAV-anti-miR-20b MCD + Fenofibrate	151.147	15.8221	2.05923e-05	0.0139355	0.00812302	5			236.612	202.549	246.916	112.536
											285.152	168.23	186.454

## Sheet: Figure 9K
Source Data - Figure 9
qPCR					vs. AAV-Control MCD	vs. AAV-anti-miR-20b MCD	vs. AAV-Control MCD + Fenofibrate
figure	Gene		mean	SEM	p value	p value	p value	n
					(t-test)	(t-test)	(t-test)				Tnf	Ccl2	Il6	Il1b	TBP
9K	Tnf	AAV-Control MCD	1	0.126809				6		AAV-Control	25	31.48	22.0179	23.47	27.02
		AAV-anti-miR-20b MCD	0.736276	0.031893	0.0356756			6			24.87	30.98	20.7401	22.93	26.72
		AAV-Control MCD + Fenofibrate	0.718796	0.0314453	0.0284194			6			23.93	28.48	21.3556	21.75	26.59
		AAV-anti-miR-20b MCD + Fenofibrate	0.582495	0.0414848	0.00913059	0.00760227	0.0128633	5			23.24	27.61	22.4241	22.88	26.08
											24.8	29.68	21.9196	23.14	27.14
					vs. AAV-Control MCD	vs. AAV-anti-miR-20b MCD	vs. AAV-Control MCD + Fenofibrate				25.48	31.29	23.2538	23.88	27.25
figure	Gene		mean	SEM	p value	p value	p value	n		AAV-Control + Feno	25.66	30.44	24.1718	23.14	27.28
					(t-test)	(t-test)	(t-test)				24.52	31.22	22.3988	22.59	26.45
9K	Ccl2	AAV-Control MCD	1	0.330341				6			24.84	30.54	22.2986	23.23	26.61
		AAV-anti-miR-20b MCD	0.291545	0.0779154	0.0317056			6			24.29	30.61	23.6585	22.62	26.19
		AAV-Control MCD + Fenofibrate	0.361538	0.0752702	0.0444361			6			24.69	31.11	22.3068	22.86	26.71
		AAV-anti-miR-20b MCD + Fenofibrate	0.262814	0.0193585	0.0372863	0.375615	0.137742	5			24.95	31.51	21.9537	22.76	26.63
										AAV-anti-miR-20b	24.77	30.1	22.4407	23.48	26.86
					vs. AAV-Control MCD	vs. AAV-anti-miR-20b MCD	vs. AAV-Control MCD + Fenofibrate				24.74	31.26	22.5415	24.65	26.63
figure	Gene		mean	SEM	p value	p value	p value	n			24.65	32.02	22.0668	22.64	26.59
					(t-test)	(t-test)	(t-test)				25.2	31.64	22.4706	22.72	26.95
9K	Il6	AAV-Control MCD	1	0.224269				6			25.54	31.89	22.8592	23.84	27.21
		AAV-anti-miR-20b MCD	0.565938	0.0680687	0.0468665			6			24.71	31.62	23.4448	23.25	26.5
		AAV-Control MCD + Fenofibrate	0.491133	0.0941948	0.0314601			6		AAV-anti-miR-20b + Feno	25.31	31.25	22.4894	23.14	26.78
		AAV-anti-miR-20b MCD + Fenofibrate	0.38282	0.065958	0.0192916	0.0443496	0.19504	5			26.13	31.83	23.5301	23.01	27.43
											25.43	31.62	24.1948	23.53	26.98
					vs. AAV-Control MCD	vs. AAV-anti-miR-20b MCD	vs. AAV-Control MCD + Fenofibrate				26.59	32.45	24.6913	24.55	27.96
figure	Gene		mean	SEM	p value	p value	p value	n			24.84	31.75	23.0742	22.96	26.7
					(t-test)	(t-test)	(t-test)
9K	Il1b	AAV-Control MCD	1	0.194874				6
		AAV-anti-miR-20b MCD	0.762736	0.14025	0.17318			6
		AAV-Control MCD + Fenofibrate	0.930497	0.0683798	0.371709			6
		AAV-anti-miR-20b MCD + Fenofibrate	0.920155	0.13218	0.376593	0.22089	0.471618	5

## Sheet: Figure 9L
Source Data - Figure 9
qPCR					vs. AAV-Control MCD	vs. AAV-anti-miR-20b MCD	vs. AAV-Control MCD + Fenofibrate
figure	Gene		mean	SEM	p value	p value	p value	n
					(t-test)	(t-test)	(t-test)				Acta2	Col1a1	Col3a1	Fn	Timp1	Vim	TBP
9L	Acta2	AAV-Control MCD	1	0.122694				6		AAV-Control	25.56	28.05	30.96	27.54	26.1791	26.1147	27.02
		AAV-anti-miR-20b MCD	0.680339	0.0612596	0.0209908			6			25.87	29.1	30.98	27.92	25.6026	26.6291	26.72
		AAV-Control MCD + Fenofibrate	0.695279	0.0543835	0.0232642			6			25.78	28.58	30.79	26.33	25.9872	25.9694	26.59
		AAV-anti-miR-20b MCD + Fenofibrate	0.532415	0.0445447	0.00457821	0.0465428	0.0254308	5			25.8	28.79	29.18	27.94	25.9415	25.1824	26.08
											25.64	28.56	31.11	26.14	25.6357	25.3716	27.14
					vs. AAV-Control MCD	vs. AAV-anti-miR-20b MCD	vs. AAV-Control MCD + Fenofibrate				26.18	28.53	31.17	27.93	25.7919	25.6611	27.25
figure	Gene		mean	SEM	p value	p value	p value	n		AAV-Control + Feno	26.86	29.18	30.69	26.71	26.9006	25.9996	27.28
					(t-test)	(t-test)	(t-test)				25.78	28.7	30.57	27.13	25.967	26.8911	26.45
9L	Col1a1	AAV-Control MCD	1	0.174278				6			25.7	29.57	30.82	28.76	26.3935	26.3274	26.61
		AAV-anti-miR-20b MCD	0.63239	0.10338	0.0498614			6			25.63	28.99	30.13	28.01	25.6491	26.5418	26.19
		AAV-Control MCD + Fenofibrate	0.586315	0.0697995	0.0260637			6			26.61	29.02	30.06	27.15	26.0059	25.9651	26.71
		AAV-anti-miR-20b MCD + Fenofibrate	0.405669	0.0454412	0.00727412	0.0473667	0.0343423	5			26.25	29.41	30.63	28.33	27.6147	28.2755	26.63
										AAV-anti-miR-20b	26.52	29.97	30.72	27.53	27.1291	26.2141	26.86
					vs. AAV-Control MCD	vs. AAV-anti-miR-20b MCD	vs. AAV-Control MCD + Fenofibrate				26.23	28.95	31.93	27.9	27.1694	26.4595	26.63
figure	Gene		mean	SEM	p value	p value	p value	n			26.31	28.65	30.62	27.49	25.6824	25.7156	26.59
					(t-test)	(t-test)	(t-test)				25.95	29.55	31.06	27.95	26.3716	26.5527	26.95
9L	Col3a1	AAV-Control MCD	1	0.138863				6			26.62	28.81	31.17	28.94	27.1611	26.3859	27.21
		AAV-anti-miR-20b MCD	0.767987	0.0951452	0.0990809			6			26.28	29.41	31.02	27.4	26.4996	25.7281	26.5
		AAV-Control MCD + Fenofibrate	1.03129	0.112252	0.432194			6		AAV-anti-miR-20b + Feno	26.75	30.28	31.08	30.25	27.8911	27.6694	26.78
		AAV-anti-miR-20b MCD + Fenofibrate	0.829951	0.0722387	0.16729	0.314305	0.092388	5			26.96	30.06	31.17	28.4	27.9274	27.0885	27.43
											27.12	29.96	31.25	30.2	26.9418	26.5179	26.98
					vs. AAV-Control MCD	vs. AAV-anti-miR-20b MCD	vs. AAV-Control MCD + Fenofibrate				27.63	30.66	31.93	31.41	27.8651	26.7801	27.96
figure	Gene		mean	SEM	p value	p value	p value	n			26.77	29.99	31.08	29.72	26.89	26.8176	26.7
					(t-test)	(t-test)	(t-test)
9L	Fn	AAV-Control MCD	1	0.297468				6
		AAV-anti-miR-20b MCD	0.557652	0.0532503	0.0869843			6
		AAV-Control MCD + Fenofibrate	0.70025	0.222392	0.219203			6
		AAV-anti-miR-20b MCD + Fenofibrate	0.211755	0.0937392	0.0226955	0.0042239	0.0464993	5
					vs. AAV-Control MCD	vs. AAV-anti-miR-20b MCD	vs. AAV-Control MCD + Fenofibrate
figure	Gene		mean	SEM	p value	p value	p value	n
					(t-test)	(t-test)	(t-test)
9L	Timp1	AAV-Control MCD	1	0.138554				6
		AAV-anti-miR-20b MCD	0.569007	0.0898867	0.0130295			6
		AAV-Control MCD + Fenofibrate	0.61241	0.0791182	0.0177482			6
		AAV-anti-miR-20b MCD + Fenofibrate	0.408672	0.0548221	0.00256358	0.0912773	0.0366267	5
					vs. AAV-Control MCD	vs. AAV-anti-miR-20b MCD	vs. AAV-Control MCD + Fenofibrate
figure	Gene		mean	SEM	p value	p value	p value	n
					(t-test)	(t-test)	(t-test)
9L	Vim	AAV-Control MCD	1	0.172302				6
		AAV-anti-miR-20b MCD	0.730657	0.0535235	0.0831714			6
		AAV-Control MCD + Fenofibrate	0.56151	0.146281	0.0405385			6
		AAV-anti-miR-20b MCD + Fenofibrate	0.599545	0.13542	0.0553148	0.179779	0.427667	5
