# Supplementary material for: Hepatic MIR20B promotes nonalcoholic fatty liver disease by suppressing PPARA
Source: eLife. 2021 Dec 29;10:e70472. doi: 10.7554/eLife.70472 (PMC8758141; doi:10.7554/eLife.70472)
Supplement: Figure 10—source data 1. [file elife-70472-fig10-data1.xlsx]

## Sheet: Figure 10A
Source Data - Figure 10
qPCR					vs. Normal	vs. Steatosis					E2F1	TBP
figure	Gene	Patients	mean	SEM	p value	p value	n			Normal	27.5591	28.6359
					(t-test)	(t-test)					28.2051	28.3843
10A	E2F1	Normal	1	0.188484			11				28.1598	26.9026
		Steatosis	2.32905	0.160802	0.00109201		4				26.8393	27.2531
		NASH	2.1712	0.526725	0.0117952	0.410299	6				27.1966	27.5575
											27.9435	28.152
											26.9209	25.6161
											26.4564	27.6758
											27.3783	29.2712
											29.9818	30.3001
											27.169	27.0256
										Steatosis	24.5243	26.2618
											24.7739	26.8239
											25.4733	27.027
											26.4128	28.0755
										NASH	20.9339	23.2596
											21.5828	22.7157
											21.1401	21.174
											20.9968	22.3745
											24.8659	26.0309
											22.541	25.1053

## Sheet: Figure 10B
Source Data - Figure 10
qPCR									E2F1	TBP
figure	Gene	HepG2	mean	SEM	p value	n		NT	24.2059	19.8592
					(t-test)				24.2004	20.1314
10B	E2F1	NT	1	0.311303		3			23.7577	20.3679
		OA	2.04613	0.332204	0.0415683	3			23.8403	21.444
									23.8875	21.2961
									23.6902	21.476
								OA	22.0329	21.6313
									22.6957	19.9847
									22.2286	19.9775
									22.3433	20.0015
									21.742	20.0052
									22.2287	19.7186

## Sheet: Figure 10C
Source Data - Figure 10
qPCR
figure	Gene	Huh7	mean	SEM	p value	n
					(t-test)				E2F1	TBP
10C	E2F1	NT	1	0.0977257		3		NT	23.8253	26.2478
		OA	1.47905	0.125717	0.0198046	3			23.9573	25.8441
									23.7039	25.6406
									23.568	25.6518
									24.7263	26.2617
									24.6307	26.4183
								OA	21.7575	23.5607
									22.7303	25.9556
									21.3012	23.708
									22.8441	25.8822
									24.0491	26.2178
									24.0659	26.4888

## Sheet: Figure 10D
Source Data - Figure 10
qPCR
figure	Gene		mean	SEM	p value	n			E2F1	TBP
					(t-test)			AAV-Vector	27.5484	25.8752
10D	E2f1	NCD	1	0.190298		5			27.4738	25.7847
		HFD	2.28739	0.30712	0.00368295	5			27.3801	27.4552
									28.163	27.3631
									27.6448	26.7127
									27.5297	26.6576
									27.3756	27.1328
									27.6767	27.2122
									27.6186	25.3656
									27.7893	26.7585
								AAV-Vector HFD	25.843	26.3094
									25.6292	26.5338
									25.7954	26.3359
									25.387	26.3725
									26.5429	26.4135
									26.4308	26.7048
									25.9641	26.0536
									26.3674	25.973
									25.5547	25.7068
									26.3049	26.1038

## Sheet: Figure 10E
Source Data - Figure 10
qPCR										E2f1	TBP
figure	Gene		mean	SEM	p value	n			AAV-Vector	27.7158	26.3352
					(t-test)					28.5657	26.269
10E	E2f1	NCD	1	0.0774436		5				27.6278	26.1272
		MCD	3.82552	0.300376	8.4819e-06	5				28.2059	26.417
										27.8898	26.3142
										28.6124	26.304
										29.4928	27.9406
										29.9051	28.1268
										27.5013	25.54
										28.1356	25.4907
									AAV-Vector	26.582	26.827
										26.5535	26.8408
										26.0628	26.5834
										26.5746	26.6481
										25.8877	26.051
										26.0792	26.0561
										25.8185	25.9756
										26.0071	25.9179
										27.0129	26.6526
										27.1386	26.7263
